# Supplementary material for: Transition-metal catalyzed reactions of diazo compounds and N,N-dialkylnitrosoamines
Source: Royal Society of Chemistry journal article supplement (doi:10.1039/d3qo01607b), 2023-11-21

## Supporting information

### Transition-metal catalyzed reactions of diazo compounds and *N,N*-dialkylnitrosoamines

Yuan Chen, Rui-jun Peng, Xue-jing Zhang, Ming Yan\*

*Guangdong Provincial Key Laboratory of Chiral Molecules and Drug Discovery, School of Pharmaceutical Sciences, Sun Yat-sen University, Guangzhou 510006, China*

E-mail: yanming@mail.sysu.edu.cn

|                                                                                        |    |
|----------------------------------------------------------------------------------------|----|
| 1. General information .....                                                           | 2  |
| 2. Optimization of reaction conditions .....                                           | 3  |
| 3. General procedure for the preparation of substrates .....                           | 7  |
| 4. General procedure for the preparation of products .....                             | 12 |
| 5. Gram-scale synthesis and derivatizations of the products .....                      | 13 |
| 6. Reaction of nitrosoamine with ethyl diazoacetate and methyl phenyldiazoacetate..... | 15 |
| 7. Competition experiments .....                                                       | 16 |
| 8. Characterization data for products .....                                            | 18 |
| 9. X-ray structure of the products .....                                               | 33 |
| 10. References.....                                                                    | 37 |
| 11. NMR spectra of products .....                                                      | 38 |

## 1. General information

$^1\text{H}$  NMR and  $^{13}\text{C}$  NMR spectra were recorded on Bruker AVANCE 400 MHz or 500 MHz spectrometer. Chemical shifts of protons are reported in parts per million downfield from tetramethylsilane. Chemical shifts of carbon are referenced to the center line of a triplet at 77.0 ppm of chloroform- $d_3$ . Peaks are labeled as single (s), broad singlet (bs), doublet (d), triplet (t), quartet (q), double doublet (dd), triple doublet (td), multiplet (m). Melting points were determined with a commercially available melting point apparatus. High-resolution mass spectra (HRMS) were acquired using an electron spray ionization time of flight (ESI-TOF) mass spectrometer in positive mode. All reagents were used without further purification as received from commercial suppliers unless otherwise noted. All solvents were dried and distilled prior to use according to the standard protocols. Substrates **1k**, **2q** was purchased from commercial suppliers without further purification. Substrates **1a-1j**,<sup>1</sup> **1l-1y**,<sup>1</sup> **2a-2k**,<sup>2</sup> **2l-2p**,<sup>3</sup> **2r**<sup>3</sup> were synthesized according to the reported procedures. Their NMR data were identical to those reported in the literature.

## 2. Optimization of reaction conditions

### 2.1 Optimization of rearrangement reaction conditions

**Table S1.** Screening of catalyst and optimization of rearrangement reaction conditions<sup>a</sup>

Reaction scheme: 1a + 2a  $\xrightarrow[\text{solvent, N}_2, \text{T, 12 h}]{\text{Catalyst, Additive}}$  3a

| Entry     | <b>1a:2a</b> | Catalyst (mol%)                                              | Additive (mol%)                       | solvent    | T (°C)    | Yield (%)                  |
|-----------|--------------|--------------------------------------------------------------|---------------------------------------|------------|-----------|----------------------------|
| 1         | 1:1.5        | [Cp*RhCl <sub>2</sub> ] <sub>2</sub> (2.5)                   | AgSbF <sub>6</sub> (15)<br>AgOAc (15) | DCE        | rt.       | 0                          |
| 2         | 1:1.5        | [Cp*RhCl <sub>2</sub> ] <sub>2</sub> (2.5)                   | AgSbF <sub>6</sub> (15)<br>AgOAc (15) | DCE        | 60        | 60                         |
| 3         | 1:1.5        | [Cp*RhCl <sub>2</sub> ] <sub>2</sub> (2.5)                   | AgSbF <sub>6</sub> (15)               | DCE        | 60        | 64                         |
| 4         | 1:1.5        | Cu(OTf) <sub>2</sub> (2.5)                                   | none                                  | DCE        | rt.       | 0                          |
| 5         | 1:1.5        | Rh <sub>2</sub> (OAc) <sub>4</sub> (2.5)                     | none                                  | DCE        | rt.       | 0                          |
| 6         | 1:1.5        | Pd(OAc) <sub>2</sub> (2.5)                                   | none                                  | DCE        | 80        | 0                          |
| 7         | 1:1.5        | [IPrAuCl] (2.5)                                              | AgSbF <sub>6</sub> (15)               | DCE        | 60        | trace                      |
| 8         | 1:1.5        | [Cp*IrCl <sub>2</sub> ] <sub>2</sub> (2.5)                   | AgSbF <sub>6</sub> (15)               | DCE        | 60        | 20                         |
| 9         | 1:1.5        | Cp*Co(CO)I <sub>2</sub> (2.5)                                | AgSbF <sub>6</sub> (15)               | DCE        | 60        | 0                          |
| 10        | 1:1.5        | [RuCl <sub>2</sub> ( <i>p</i> -cymene)] <sub>2</sub> (2.5)   | AgSbF <sub>6</sub> (15)               | DCE        | 60        | 81                         |
| 11        | 1:1.5        | none                                                         | AgSbF <sub>6</sub> (15)               | DCE        | 60        | 0                          |
| 12        | 1:1.5        | [RuCl <sub>2</sub> ( <i>p</i> -cymene)] <sub>2</sub> (2.5)   | none                                  | DCE        | 60        | 0                          |
| 13        | 2:1          | [RuCl <sub>2</sub> ( <i>p</i> -cymene)] <sub>2</sub> (2.5)   | AgSbF <sub>6</sub> (15)               | DCE        | 60        | 82                         |
| <b>14</b> | <b>1.5:1</b> | <b>[RuCl<sub>2</sub>(<i>p</i>-cymene)]<sub>2</sub> (2.5)</b> | <b>AgSbF<sub>6</sub> (15)</b>         | <b>DCE</b> | <b>60</b> | <b>96 (96<sup>b</sup>)</b> |
| 15        | 1:1          | [RuCl <sub>2</sub> ( <i>p</i> -cymene)] <sub>2</sub> (2.5)   | AgSbF <sub>6</sub> (15)               | DCE        | 60        | 68                         |
| 16        | 1:2          | [RuCl <sub>2</sub> ( <i>p</i> -cymene)] <sub>2</sub> (2.5)   | AgSbF <sub>6</sub> (15)               | DCE        | 60        | 72                         |
| 17        | 1.5:1        | [RuCl <sub>2</sub> ( <i>p</i> -cymene)] <sub>2</sub> (2.5)   | AgOAc (15)                            | DCE        | 60        | 35                         |
| 18        | 1.5:1        | [RuCl <sub>2</sub> ( <i>p</i> -cymene)] <sub>2</sub> (2.5)   | AgNTf <sub>2</sub> (15)               | DCE        | 60        | 78                         |
| 19        | 1.5:1        | [RuCl <sub>2</sub> ( <i>p</i> -cymene)] <sub>2</sub> (2.5)   | AgOTf (15)                            | DCE        | 60        | 87                         |
| 20        | 1.5:1        | [RuCl <sub>2</sub> ( <i>p</i> -cymene)] <sub>2</sub> (2.5)   | AgBF <sub>4</sub> (15)                | DCE        | 60        | 72                         |
| 21        | 1.5:1        | [RuCl <sub>2</sub> ( <i>p</i> -cymene)] <sub>2</sub> (2.5)   | AgSbF <sub>6</sub> (15)               | Toluene    | 60        | 60                         |

|    |       |                                                             |                          |                    |     |       |
|----|-------|-------------------------------------------------------------|--------------------------|--------------------|-----|-------|
| 22 | 1.5:1 | [RuCl <sub>2</sub> ( <i>p</i> -cymene)] <sub>2</sub> (2.5)  | AgSbF <sub>6</sub> (15)  | MeOH               | 60  | trace |
| 23 | 1.5:1 | [RuCl <sub>2</sub> ( <i>p</i> -cymene)] <sub>2</sub> (2.5)  | AgSbF <sub>6</sub> (15)  | Dioxane            | 60  | 0     |
| 24 | 1.5:1 | [RuCl <sub>2</sub> ( <i>p</i> -cymene)] <sub>2</sub> (2.5)  | AgSbF <sub>6</sub> (15)  | THF                | 60  | 42    |
| 25 | 1.5:1 | [RuCl <sub>2</sub> ( <i>p</i> -cymene)] <sub>2</sub> (2.5)  | AgSbF <sub>6</sub> (15)  | CH <sub>3</sub> CN | 60  | trace |
| 26 | 1.5:1 | [RuCl <sub>2</sub> ( <i>p</i> -cymene)] <sub>2</sub> (2.5)  | AgSbF <sub>6</sub> (15)  | DMSO               | 60  | 0     |
| 27 | 1.5:1 | [RuCl <sub>2</sub> ( <i>p</i> -cymene)] <sub>2</sub> (2.5)  | AgSbF <sub>6</sub> (15)  | DCE                | rt. | 82    |
| 28 | 1.5:1 | [RuCl <sub>2</sub> ( <i>p</i> -cymene)] <sub>2</sub> (2.5)  | AgSbF <sub>6</sub> (15)  | DCE                | 80  | 76    |
| 29 | 1.5:1 | [RuCl <sub>2</sub> ( <i>p</i> -cymene)] <sub>2</sub> (1.25) | AgSbF <sub>6</sub> (7.5) | DCE                | 60  | 87    |
| 30 | 1.5:1 | [RuCl <sub>2</sub> ( <i>p</i> -cymene)] <sub>2</sub> (5)    | AgSbF <sub>6</sub> (30)  | DCE                | 60  | 67    |

<sup>a</sup>Reaction conditions: **1a**, **2a**, solvent (0.1 M) for 12 h under a N<sub>2</sub> atmosphere; Yield determined by <sup>1</sup>H NMR using dimethyl terephthalate as the internal standard.

<sup>b</sup>Isolated yield after column chromatography.

## 2.2 Optimization of ylide reaction conditions

**Table S2.** Screening of catalyst and optimization of ylide reaction conditions<sup>a</sup>

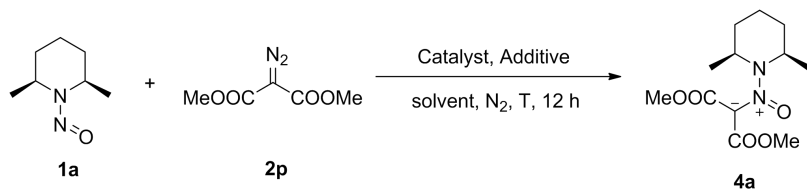

| Entry | 1a:2a | Catalyst (mol%)                                            | Additive (mol%)         | solvent | T (°C) | Yield (%)             |
|-------|-------|------------------------------------------------------------|-------------------------|---------|--------|-----------------------|
| 1     | 1.5:1 | [RuCl <sub>2</sub> ( <i>p</i> -cymene)] <sub>2</sub> (2.5) | AgSbF <sub>6</sub> (15) | DCE     | 60     | 38                    |
| 2     | 1.5:1 | [Cp*RhCl <sub>2</sub> ] <sub>2</sub> (2.5)                 | AgSbF <sub>6</sub> (15) | DCE     | 60     | 51                    |
| 3     | 1.5:1 | Cu(OTf) <sub>2</sub> (2.5)                                 | none                    | DCE     | rt.    | 0                     |
| 4     | 1.5:1 | Rh <sub>2</sub> (OAc) <sub>4</sub> (2.5)                   | none                    | DCE     | rt.    | 0                     |
| 5     | 1.5:1 | Pd(OAc) <sub>2</sub> (2.5)                                 | none                    | DCE     | 80     | 0                     |
| 6     | 1.5:1 | [IPrAuCl] (2.5)                                            | AgSbF <sub>6</sub> (15) | DCE     | 60     | 0                     |
| 7     | 1.5:1 | [Cp*IrCl <sub>2</sub> ] <sub>2</sub> (2.5)                 | AgSbF <sub>6</sub> (15) | DCE     | 60     | 10                    |
| 8     | 1.5:1 | Cp*Co(CO)I <sub>2</sub> (2.5)                              | AgSbF <sub>6</sub> (15) | DCE     | 60     | 0                     |
| 9     | 1.5:1 | none                                                       | AgSbF <sub>6</sub> (15) | DCE     | 60     | 0                     |
| 10    | 2:1   | [Cp*RhCl <sub>2</sub> ] <sub>2</sub> (2.5)                 | AgSbF <sub>6</sub> (15) | DCE     | 60     | 45                    |
| 11    | 1:1   | [Cp*RhCl <sub>2</sub> ] <sub>2</sub> (2.5)                 | AgSbF <sub>6</sub> (15) | DCE     | 60     | 30                    |
| 12    | 1:1.5 | [Cp*RhCl <sub>2</sub> ] <sub>2</sub> (2.5)                 | AgSbF <sub>6</sub> (15) | DCE     | 60     | 43                    |
| 13    | 1:2   | [Cp*RhCl <sub>2</sub> ] <sub>2</sub> (2.5)                 | AgSbF <sub>6</sub> (15) | DCE     | 60     | 69 (67 <sup>b</sup> ) |
| 14    | 1:3   | [Cp*RhCl <sub>2</sub> ] <sub>2</sub> (2.5)                 | AgSbF <sub>6</sub> (15) | DCE     | 60     | 68                    |
| 15    | 1:2   | [Cp*RhCl <sub>2</sub> ] <sub>2</sub> (2.5)                 | AgOAc (15)              | DCE     | 60     | trace                 |
| 16    | 1:2   | [Cp*RhCl <sub>2</sub> ] <sub>2</sub> (2.5)                 | AgNTf <sub>2</sub> (15) | DCE     | 60     | 20                    |
| 17    | 1:2   | [Cp*RhCl <sub>2</sub> ] <sub>2</sub> (2.5)                 | AgOTf (15)              | DCE     | 60     | trace                 |
| 18    | 1:2   | [Cp*RhCl <sub>2</sub> ] <sub>2</sub> (2.5)                 | AgF (15)                | DCE     | 60     | trace                 |
| 19    | 1:2   | [Cp*RhCl <sub>2</sub> ] <sub>2</sub> (2.5)                 | AgBF <sub>4</sub> (15)  | DCE     | 60     | 10                    |
| 20    | 1:2   | [Cp*RhCl <sub>2</sub> ] <sub>2</sub> (2.5)                 | AgSbF <sub>6</sub> (15) | Toluene | 60     | trace                 |
| 21    | 1:2   | [Cp*RhCl <sub>2</sub> ] <sub>2</sub> (2.5)                 | AgSbF <sub>6</sub> (15) | MeOH    | 60     | trace                 |
| 22    | 1:2   | [Cp*RhCl <sub>2</sub> ] <sub>2</sub> (2.5)                 | AgSbF <sub>6</sub> (15) | Dioxane | 60     | trace                 |
| 23    | 1:2   | [Cp*RhCl <sub>2</sub> ] <sub>2</sub> (2.5)                 | AgSbF <sub>6</sub> (15) | THF     | 60     | trace                 |

|    |     |                                             |                          |                    |     |    |
|----|-----|---------------------------------------------|--------------------------|--------------------|-----|----|
| 24 | 1:2 | [Cp*RhCl <sub>2</sub> ] <sub>2</sub> (2.5)  | AgSbF <sub>6</sub> (15)  | CH <sub>3</sub> CN | 60  | 0  |
| 25 | 1:2 | [Cp*RhCl <sub>2</sub> ] <sub>2</sub> (2.5)  | AgSbF <sub>6</sub> (15)  | DMSO               | 60  | 0  |
| 26 | 1:2 | [Cp*RhCl <sub>2</sub> ] <sub>2</sub> (2.5)  | AgSbF <sub>6</sub> (15)  | DCE                | rt. | 64 |
| 27 | 1:2 | [Cp*RhCl <sub>2</sub> ] <sub>2</sub> (2.5)  | AgSbF <sub>6</sub> (15)  | DCE                | 80  | 45 |
| 28 | 1:2 | [Cp*RhCl <sub>2</sub> ] <sub>2</sub> (1.25) | AgSbF <sub>6</sub> (7.5) | DCE                | 60  | 64 |
| 29 | 1:2 | [Cp*RhCl <sub>2</sub> ] <sub>2</sub> (5)    | AgSbF <sub>6</sub> (30)  | DCE                | 60  | 52 |

<sup>a</sup>Reaction conditions: **1a**, **2p**, solvent (0.1 M) for 12 h under a N<sub>2</sub> atmosphere; Yield determined by <sup>1</sup>H NMR using dimethyl terephthalate as the internal standard.

<sup>b</sup>Isolated yield after column chromatography.

### 3. General procedure for the preparation of substrates

#### 3.1 Preparation of nitrosoamines **1a-1c**, **1e**, **1g-1h**, **1l-1o**, **1q-1s**, **1x-1y** (taking **1a** as an example)<sup>1a</sup>

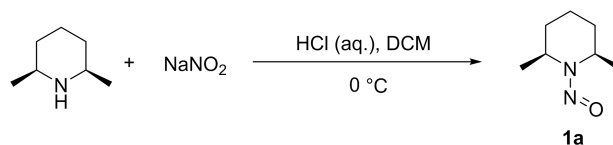

Scheme S1. Preparation of **1a**

*cis*-2,6-Dimethylpiperidine (1.35 mL, 1.13 g, 10 mmol) and  $\text{NaNO}_2$  (2.07 g, 30 mmol) were dissolved in DCM (50 mL, 0.2 M) at  $0\text{ }^\circ\text{C}$  in an ice bath and 2 M HCl (10 mL) was added dropwise to this solution. The solution was stirred at the same temperature for 3 h and quenched by adding water. The crude mixture was extracted with DCM and the combined organic layers were washed with brine, dried over anhydrous  $\text{Na}_2\text{SO}_4$ , filtered, and concentrated under reduced pressure. The residue was purified by flash column chromatography (*n*-hexane:ethyl acetate = 20:1) to give a yellow oil **1a** (1.25 g, 88%).

#### 3.2 Preparation of nitrosoamines **1d**, **1f**, **1i**, **1t**, **1u-1w** (taking **1d** as an example)<sup>1b</sup>

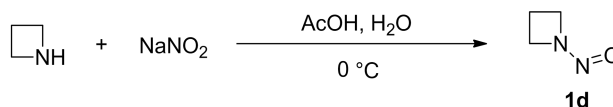

Scheme S2. Preparation of **1d**

To a solution of azetidine (0.67 mL, 570.9 mg, 10 mmol) in a mixture of acetic acid (6 mL) and water (1.2 mL), an aqueous solution of  $\text{NaNO}_2$  (1.04 g, 15 mmol) in water (3 mL) was added at  $0\text{ }^\circ\text{C}$  in an ice-water bath. The reaction mixture was stirred for 3 h, then extracted with DCM. The organic layer was washed with brine, and dried over anhydrous  $\text{Na}_2\text{SO}_4$ . The solvent was evaporated to give a residue, which was purified by flash column chromatography (*n*-hexane:ethyl acetate = 2:1) to give a yellow oil **1d** (282.6 mg, 33%).

#### 3.3 Preparation of *N,N*-dimethyl nitrosoamine **1j**<sup>1c</sup>

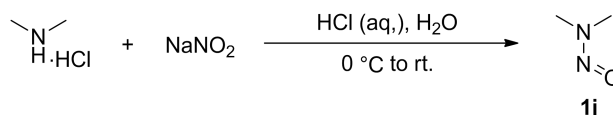

Scheme S3. Preparation of **1j**

Dimethylamine hydrochloride (815.4 mg, 10 mmol) was dissolved in 2 M HCl (3 mL) at  $0\text{ }^\circ\text{C}$  in

an ice bath. Next,  $\text{NaNO}_2$  (1.04 g, 15 mmol) was dissolved in water (5 mL) and added dropwise to this solution. Following the complete addition of  $\text{NaNO}_2$ , the reaction mixture was stirred at 0 °C for 3 h and then at room temperature overnight. The crude mixture was extracted with DCM and the combined organic layers were dried over anhydrous  $\text{Na}_2\text{CO}_3$  and  $\text{Na}_2\text{SO}_4$ , filtered, and concentrated under reduced pressure below 30 °C to give a yellow oil **1j** (253.7 mg, 34%).

### 3.4 Preparation of *N,N*-dibenzyl nitrosoamine **1p**<sup>1d</sup>

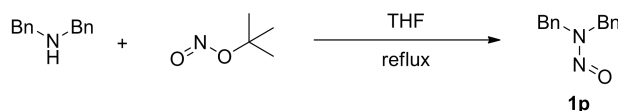

**Scheme S4.** Preparation of **1p**

Dibenzylamine (0.96 mL, 986.4 mg, 5 mmol) was dissolved in THF (10 mL) at room temperature and the tertbutyl nitrite (0.89 mL, 773.4 mg, 7.5 mmol) was added. The resulting cloudy mixture was refluxed for 17 h then cooled to room temperature. The solvent was evaporated to give a residue, which was purified by flash column chromatography (*n*-hexane:ethyl acetate = 20:1) to give a yellow crystal **1p** (998.4 mg, 88%).

### 3.5 Preparation of diazoindandione **2a**<sup>2a</sup>

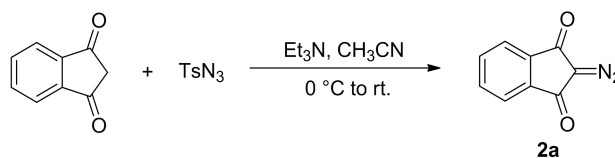

**Scheme S5.** Preparation of **2a**

To a stirred solution of *1H*-indene-1,3(2*H*)-dione (1.46 g, 10 mmol) and  $\text{TsN}_3$  (3.29 mL, 2.96 g, 15 mmol) in  $\text{CH}_3\text{CN}$  (20 mL) at 0 °C was added  $\text{Et}_3\text{N}$  (2.78 mL, 2.02 g, 20 mmol) dropwise. The reaction mixture was allowed to warm to room temperature and stirred overnight. Then the reaction mixture was purified by flash column chromatography (*n*-hexane:ethyl acetate = 100:1 to 10:1) to afford a yellow solid **2a** (1.58 g, 92%).

### 3.6 Preparation of diazoindandiones **2b-2h** (taking **2b** as an example)<sup>2a</sup>

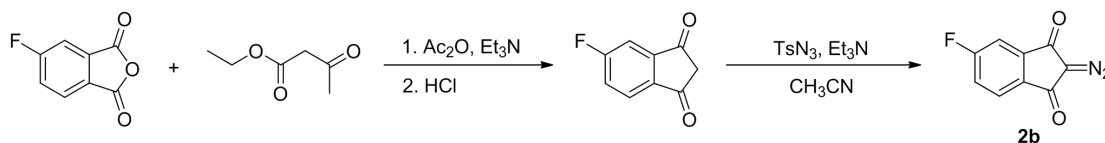

**Scheme S6.** Preparation of **2b**

5-Fluoro-1,3-isobenzofurandione (732.5 mg, 4.41 mmol) was added to a solution of Ac<sub>2</sub>O (2.4 mL) and Et<sub>3</sub>N (1.3 mL). To the resulting orange suspension, ethyl acetoacetate (0.61 mL, 629.9 mg, 4.84 mmol) was added. The red solution was stirred at room temperature for 22 h. Ice (1.7 g) and concentrate HCl (1.6 mL) were added followed by the addition of 2 M HCl (17.5 mL). The resulting mixture was stirred at 80 °C for 15 min. After cooling down to room temperature, the mixture was extracted with DCM. The combined organic extract was washed with brine, dried over anhydrous Na<sub>2</sub>SO<sub>4</sub> and the solvent was removed under reduced pressure. Then, to the solution of 5-fluoro-1*H*-indene-1,3(2*H*)-dione in CH<sub>3</sub>CN (5 mL), TsN<sub>3</sub> (1.45 mL, 1.30 g, 6.6 mmol) and Et<sub>3</sub>N (1.11 mL, 809.5 mg, 8 mmol) was added at 0 °C. The reaction mixture was allowed to warm to room temperature and stirred overnight. Afterwards, the reaction mixture was purified by flash column chromatography (*n*-hexane:ethyl acetate = 100:1 to 20:1) to afford a yellow powder **2b** (567.8 mg, 68%).

### 3.7 Preparation of diazoindandiones **2i**, **2k** (taking **2i** as an example)<sup>2b</sup>

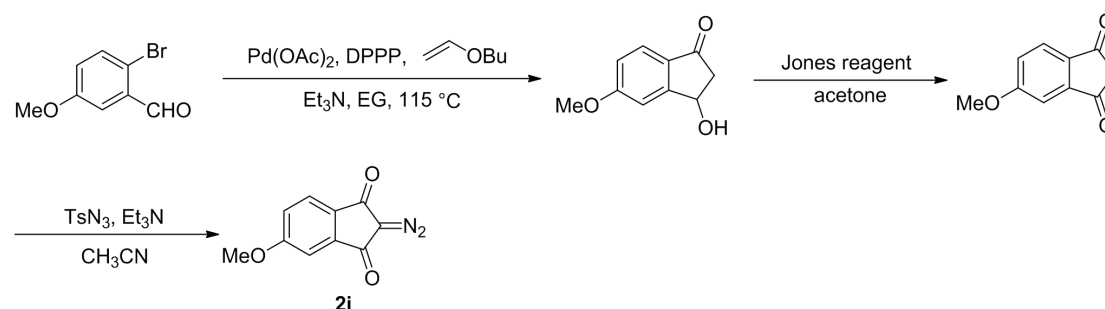

Scheme S7. Preparation of **2i**

To a two-neck round bottom flask was successively added 2-bromo-5-methoxybenzaldehyde (2.15 g, 10 mmol), Pd(OAc)<sub>2</sub> (45.3 mg, 0.2 mmol), and 1,3-bis(diphenylphosphino)propane (dppp, 123.7 mg, 0.3 mmol). The mixture was evacuated and refilled with Ar for 3 times. To the resulting mixture was added ethylene glycol (40 mL), *n*-butyl vinyl ether (3.88 mL, 3.00 g, 30 mmol), and Et<sub>3</sub>N (2.08 mL, 1.52 g, 15 mmol) under Ar and the reaction was vigorously stirred at 115 °C in an oil bath for 16 h. After cooling down to room temperature, 2 M HCl (30 mL) and EtOAc (100 mL) were added; the mixture was stirred for 1 h. After separation of the EtOAc phase, the aqueous layer was extracted with EtOAc and the combined organic layers were washed with brine, dried over anhydrous Na<sub>2</sub>SO<sub>4</sub>, filtered, and concentrated under reduced pressure. The crude residue was

purified by flash column chromatography (*n*-hexane:ethyl acetate = 20:1 to 4:1) to afford the 3-hydroxy-5-methoxy-2,3-dihydro-*1H*-inden-1-one as an orange oil (1.15 g, 65%).

3-Hydroxy-5-methoxy-2,3-dihydro-*1H*-inden-1-one (1.15g, 6.5 mmol) was dissolved in acetone (20 mL) in around bottom flask, to the mixture was added 2 M Jones reagent (6.5 mL, 13 mmol) dropwise, and the reaction mixture was stirred at room temperature for 30 min. Afterwards, the mixture was diluted with EtOAc, the mixture was washed with water, dried over anhydrous Na<sub>2</sub>SO<sub>4</sub> and removed under reduced pressure to get the 5-methoxy-*1H*-indene-1,3(2*H*)-dione as a yellow solid (1.13 g, 99%).

5-Methoxy-*1H*-indene-1,3(2*H*)-dione (1.13g, 6.4 mmol) was dissolved in CH<sub>3</sub>CN (10 mL) in a round-bottom flask. To the mixture were added TsN<sub>3</sub> (2.10 mL, 1.89 g, 9.6 mmol) and Et<sub>3</sub>N (3.56 mL, 2.59 g, 25.6 mmol) in an ice bath. After the addition, the ice bath was removed and the reaction mixture was stirred at room temperature overnight. Solvent was removed under reduced pressure, and the crude residue was further purified by flash column chromatography (*n*-hexane:ethyl acetate = 50:1 to 20:1) to afford the desired product **2i** as a yellow solid (728.8 mg, 56%).

### 3.8 Preparation of dimethoxy-diazoindandione **2j**<sup>2b</sup>

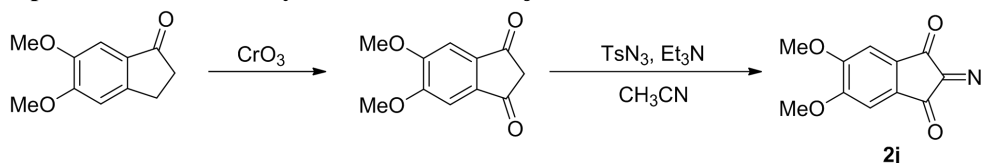

Scheme S8. Preparation of **2j**

5, 6-Dimethoxyindan-1-one (1.92 g, 10 mmol) was dissolved in a mixture of acetic acid (100 mL) and water (20 mL) in a round bottom flask. To the mixture was added chromium trioxide (5.00 g, 50 mmol) in small portions over 1 h in an ice bath. After the addition, ice bath was removed and the reaction mixture was stirred at room temperature for 24 h. 2-Propanol (20 mL) was added, and the mixture was stirred for an additional 30 min. The reaction mixture was poured into water and extracted with DCM. The combined organic layers were washed with brine, dried over anhydrous Na<sub>2</sub>SO<sub>4</sub>, filtered, and concentrated under reduced pressure to give 5,6-dimethoxy-*1H*-indene-1,3(2*H*)-dione as a pale green solid (872.6 mg, 42%).

5,6-Dimethoxy-*1H*-indene-1,3(2*H*)-dione (824.2 mg, 4 mmol) was dissolved in CH<sub>3</sub>CN (10 mL)

in a round-bottom flask. To the mixture were added TsN<sub>3</sub> (1.31 mL, 1.18 g, 6 mmol) and Et<sub>3</sub>N (2.22 mL, 1.62 g, 16 mmol) in an ice bath. After the addition, the ice bath was removed and the reaction mixture was stirred at room temperature overnight. Solvent was removed under reduced pressure, and the crude residue was further purified by flash column chromatography (*n*-hexane:ethyl acetate = 10:1 to 6:1) to afford the desired product **2j** as a yellow solid (778.3 mg, 84%).

### 3.9 Preparation of other diazo compounds **2l-2p**, **2r**<sup>3</sup>

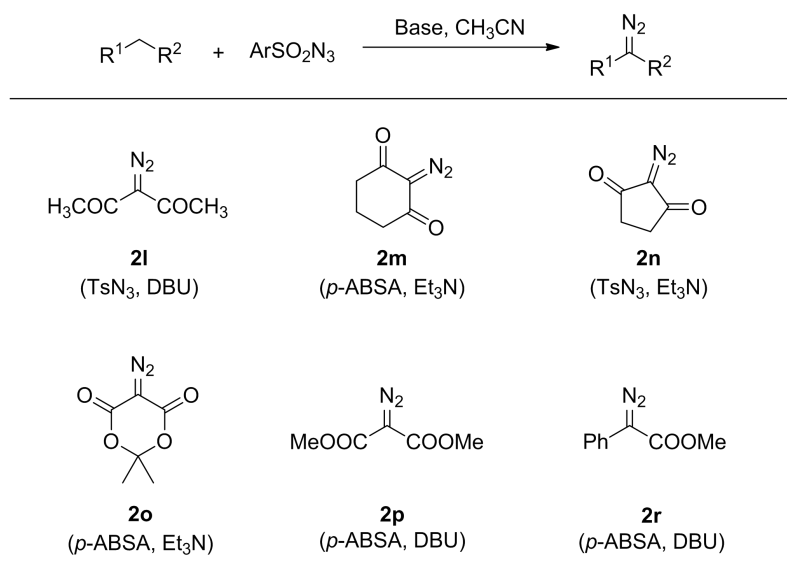

**Scheme S9.** Preparation of other diazo compounds

To a solution of the substrate (10 mmol) in anhydrous CH<sub>3</sub>CN (20 mL) at 0 °C, were added the sulfonyl azide (12 mmol) and the base (15 mmol). The mixture was stirred at room temperature until full conversion of the starting material. After the solvent was evaporated under vacuum, the residue was purified through flash column chromatography to afford corresponding diazo compounds.

## 4. General procedure for the preparation of products

### 4.1 General procedure for the synthesis of 3 (taking 3a as an example)

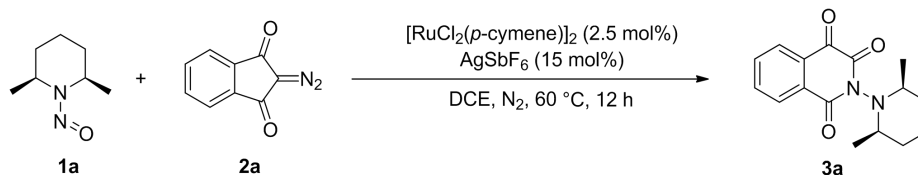

Scheme S10. Preparation of 3a

A 25 mL reaction tube equipped with a magnetic stirrer bar were charged with **2a** (34.4 mg, 0.2 mmol), [RuCl<sub>2</sub>(*p*-cymene)]<sub>2</sub> (3.1 mg, 2.5 mol%), AgSbF<sub>6</sub> (10.3 mg, 15 mol%). The mixture was evacuated and refilled with N<sub>2</sub> for 3 times. To the mixture was then added **1a** (42.6 mg, 0.3 mmol) in DCE (2 mL). The reaction mixture was stirred at 60 °C under a N<sub>2</sub> atmosphere for 12 h. The crude mixture was filtered through celite and concentrated under reduced pressure. The residue was then purified by flash column chromatography (*n*-hexane:ethyl acetate = 20:1) to give the desired product **3a** as an orange solid (54.7 mg, 96%).

### 4.2 General procedure for the synthesis of 4 (taking 4a as an example)

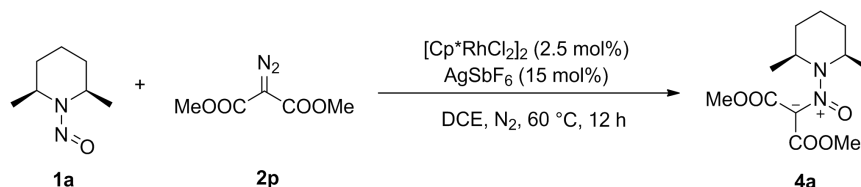

Scheme S11. Preparation of 4a

A 25 mL reaction tube equipped with a magnetic stirrer bar were charged with [Cp\*RhCl<sub>2</sub>]<sub>2</sub> (3.1 mg, 2.5 mol%), AgSbF<sub>6</sub> (10.3 mg, 15 mol%). The mixture was evacuated and refilled with N<sub>2</sub> for 3 times. To the mixture was then added **1a** (28.4 mg, 0.2 mmol) in DCE (1 mL) and **2p** (63.2 mg, 0.4 mmol) in DCE (1 mL). The reaction mixture was stirred at 60 °C under a N<sub>2</sub> atmosphere for 12 h. The crude mixture was filtered through celite and concentrated under reduced pressure. The residue was then purified by flash column chromatography (*n*-hexane:ethyl acetate = 30:1) to give the desired product **4a** as a pale yellow solid (36.2 mg, 67%).

## 5. Gram-scale synthesis and derivatizations of the products

### 5.1 Gram-scale synthesis of 3m

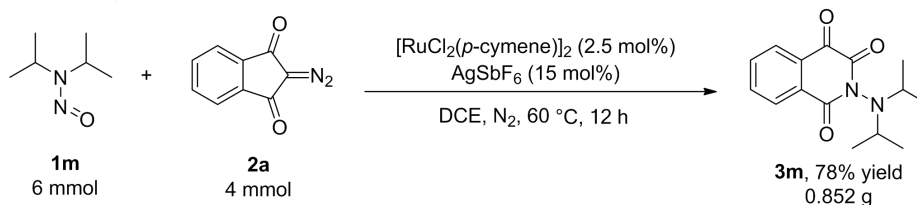

Scheme S12. Gram-scale synthesis of **3m**

A 50 mL flask equipped with a magnetic stirrer bar were charged with **2a** (688.1 mg, 4 mmol),  $[\text{RuCl}_2(p\text{-cymene})]_2$  (61.2 mg, 2.5 mol%),  $\text{AgSbF}_6$  (206.2 mg, 15 mol%). The mixture was evacuated and refilled with  $\text{N}_2$  for 3 times. To the mixture was then added **1a** (780.7 mg, 6 mmol) in DCE (20 mL). The reaction mixture was stirred at 60 °C under a  $\text{N}_2$  atmosphere for 12 h. The crude mixture was filtered through celite and concentrated under reduced pressure. The residue was then purified by flash column chromatography (*n*-hexane:ethyl acetate = 20:1) to give the desired product **3m** as an orange solid (851.7 mg, 78%).

### 5.2 Gram-scale synthesis of 4a

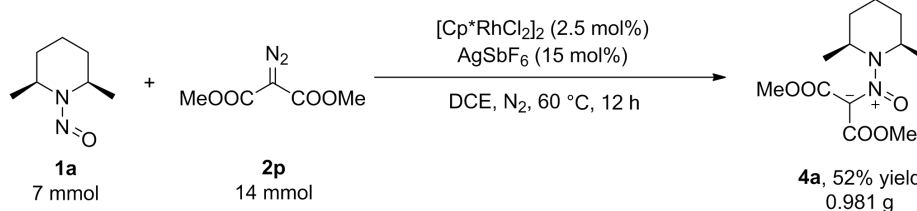

Scheme S13. Gram-scale synthesis of **4a**

A 50 mL flask equipped with a magnetic stirrer bar were charged with  $[\text{Cp}^*\text{RhCl}_2]_2$  (108.2 mg, 2.5 mol%),  $\text{AgSbF}_6$  (360.8 mg, 15 mol%). The mixture was evacuated and refilled with  $\text{N}_2$  for 3 times. To the mixture was then added **1a** (994.8 mg, 7 mmol) in DCE (5 mL) and **2p** (2.2 g, 14 mmol) in DCE (5 mL). The reaction mixture was stirred at 60 °C under a  $\text{N}_2$  atmosphere for 12 h. The crude mixture was filtered through celite and concentrated under reduced pressure. The residue was then purified by flash column chromatography (*n*-hexane:ethyl acetate = 30:1) to give the desired product **4a** as a pale yellow solid (980.9 mg, 52%).

### 5.3 Transformation of 3m to compound 5<sup>4</sup>

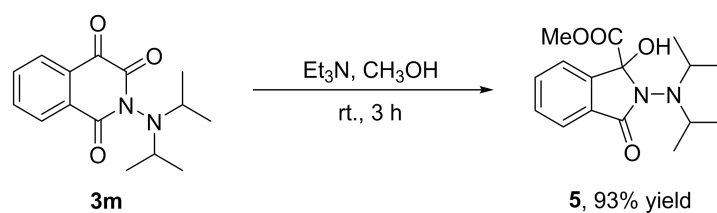

**Scheme S14.** Preparation of **5**

To the stirred solution of **3m** (137.1 mg, 0.5 mmol) in CH<sub>3</sub>OH (20 mL) was added catalytic amount of Et<sub>3</sub>N (5 drops) at room temperature and the reaction mixture was further stirred for 3 h. The crude mixture was concentrated under reduced pressure. The residue was then purified by flash column chromatography (*n*-hexane:ethyl acetate = 20:1) to give the desired product **5** as a white solid (142.1 mg, 93%).

#### 5.4 Transformation of **3m** to compound **6**<sup>5</sup>

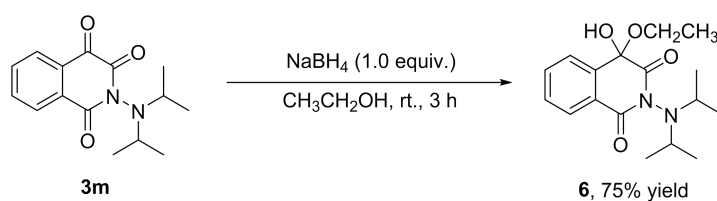

**Scheme S15.** Preparation of **6**

To a solution of **3m** (54.8 mg, 0.2 mmol) in ethanol (30 mL) was added NaBH<sub>4</sub> (7.6 mg, 0.2 mmol). The mixture was stirred at room temperature until all the starting material is consumed, approximately 3 h. Then the reaction mixture was reduced under vacuum, diluted with DCM (50 mL) and neutralized with 2 M HCl. The reaction mixture was further washed with water and brine. Then, the organic layer was dried over anhydrous Na<sub>2</sub>SO<sub>4</sub> and reduced under vacuum. The residue was then purified by flash column chromatography (*n*-hexane:ethyl acetate = 20:1) to give the desired product **6** as a yellow oil (47.8 mg, 75%).

## 6. Reaction of nitrosoamine with ethyl diazoacetate and methyl phenyldiazoacetate

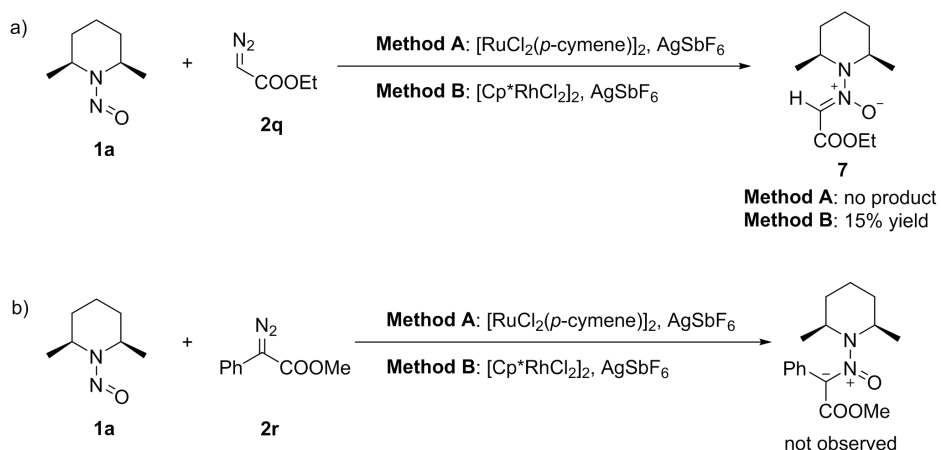

**Scheme S16.** Reaction of nitrosoamine **1a** with ethyl diazoacetate **2q** and methyl phenyldiazoacetate **2r**

A 25 mL reaction tube equipped with a magnetic stirrer bar were charged with  $[\text{Cp}^*\text{RhCl}_2]_2$  (3.1 mg, 2.5 mol%),  $\text{AgSbF}_6$  (10.3 mg, 15 mol%). The mixture was evacuated and refilled with  $\text{N}_2$  for 3 times. To the mixture was then added **1a** (28.4 mg, 0.2 mmol) in DCE (1 mL) and **2q** (21  $\mu\text{L}$ , 22.8 mg, 0.4 mmol) in DCE (1 mL). The reaction mixture was stirred at 60  $^\circ\text{C}$  under a  $\text{N}_2$  atmosphere for 12 h. The crude mixture was filtered through celite and concentrated under reduced pressure. The residue was then purified by flash column chromatography (*n*-hexane:ethyl acetate = 50:1 to 20:1) to give the desired product **7** as a yellow liquid (6.8 mg, 15%).

## 7. Competition experiments

### 7.1 Electronic effect

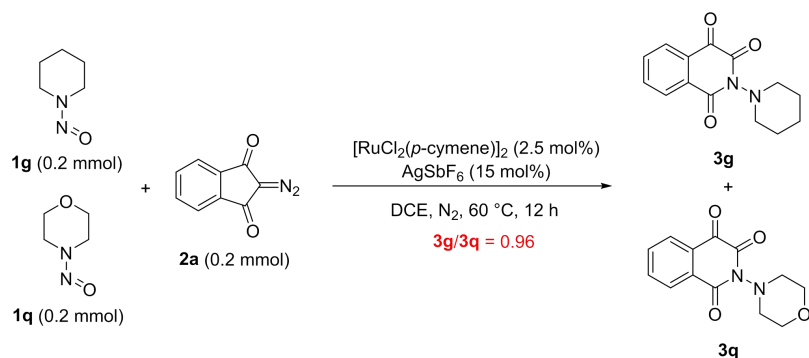

**Scheme S17.** Competition experiment of **1g**, **1q** with **2a**

A 25 mL reaction tube equipped with a magnetic stirrer bar were charged with **2a** (34.4 mg, 0.2 mmol),  $[\text{RuCl}_2(p\text{-cymene})]_2$  (3.1 mg, 2.5 mol%),  $\text{AgSbF}_6$  (10.3 mg, 15 mol%). The mixture was evacuated and refilled with  $\text{N}_2$  for 3 times. To the mixture was then added **1g** (22.8 mg, 0.2 mmol) in DCE (1 mL) and **1q** (23.2 mg, 0.2 mmol) in DCE (1 mL). The reaction mixture was stirred at 60 °C under a  $\text{N}_2$  atmosphere for 12 h. The crude mixture was filtered through celite and concentrated under reduced pressure. The residue was then purified by flash column chromatography. The ratio of **3g** and **3q** was determined to be 0.96:1 by  $^1\text{H}$  NMR analysis.

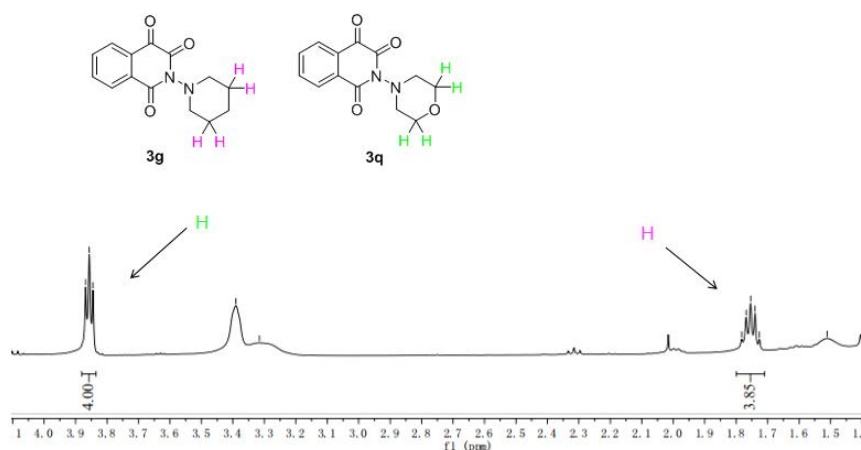

**Figure S1.**  $^1\text{H}$  NMR spectra of the mixture of **3g** and **3q**

## 7.2 Steric effect

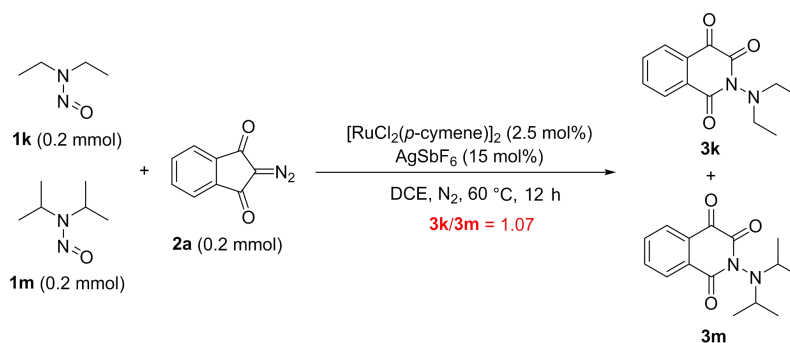

**Scheme S18.** Competition experiment of **1k**, **1m** with **2a**

A 25 mL reaction tube equipped with a magnetic stirrer bar were charged with **2a** (34.4 mg, 0.2 mmol),  $[\text{RuCl}_2(p\text{-cymene})]_2$  (3.1 mg, 2.5 mol%),  $\text{AgSbF}_6$  (10.3 mg, 15 mol%). The mixture was evacuated and refilled with  $\text{N}_2$  for 3 times. To the mixture was then added **1k** (21.5  $\mu\text{L}$ , 20.4 mg, 0.2 mmol) in DCE (1 mL) and **1m** (26.0 mg, 0.2 mmol) in DCE (1 mL). The reaction mixture was stirred at 60 °C under a  $\text{N}_2$  atmosphere for 12 h. The crude mixture was filtered through celite and concentrated under reduced pressure. The ratio of **3k** and **3m** was determined to be 1.07:1 by  $^1\text{H}$  NMR analysis.

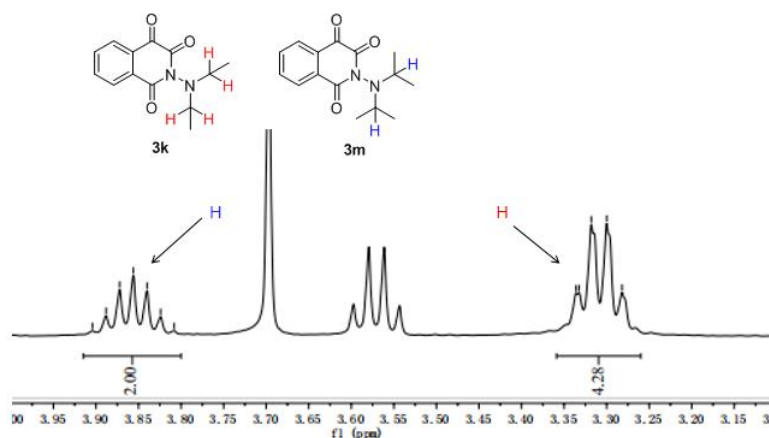

**Figure S2.**  $^1\text{H}$  NMR spectra of the mixture of **3k** and **3m**

## 8. Characterization data for products

### 2-(*cis*-2,6-Dimethylpiperidin-1-yl)isoquinoline-1,3,4(2*H*)-trione (3a)

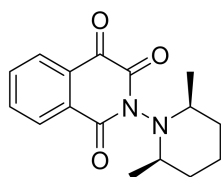

Orange solid (54.7 mg, 96% yield). By  $^{13}\text{C}$  NMR, the ratio of stereoisomers was determined to be approximately 1:1. The  $^1\text{H}$  NMR data listed here represent peak information only for the major isomer. The  $^{13}\text{C}$  NMR data listed here represent peak information for the mixture. **Mp**: 132.9-133.7 °C;  $^1\text{H}$  NMR (400 MHz,  $\text{CDCl}_3$ ):  $\delta$  8.42-8.32 (m, 1H), 8.21 (d,  $J$  = 7.6 Hz, 1H), 7.94-7.88 (m, 1H), 7.86-7.79 (m, 1H), 3.76-3.63 (m, 2H), 1.77-1.60 (m, 4H), 1.53-1.47 (m, 2H), 1.00-0.89 (m, 6H);  $^{13}\text{C}$  NMR (101 MHz,  $\text{CDCl}_3$ ):  $\delta$  175.6, 175.0, 163.2, 162.4, 158.8, 157.2, 136.2, 136.0, 134.4, 134.2, 131.3, 131.1, 130.7, 129.8, 129.7(3), 129.6(7), 127.9, 127.6, 56.2, 55.4, 34.8, 34.7, 24.2, 24.0, 19.4; **HRMS** (ESI): calculated for  $\text{C}_{16}\text{H}_{18}\text{N}_2\text{O}_3\text{Na}$   $[\text{M}+\text{Na}]^+$ : 309.1210, found: 309.1204.

### 2-(1,4-Dioxo-8-azaspiro[4.5]decan-8-yl)isoquinoline-1,3,4(2*H*)-trione (3b)

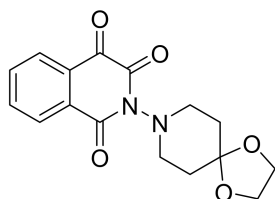

Yellow solid (36.4 mg, 58% yield). **Mp**: 123.5-124.0 °C;  $^1\text{H}$  NMR (500 MHz,  $\text{CDCl}_3$ ):  $\delta$  8.34 (d,  $J$  = 7.8 Hz, 1H), 8.17 (d,  $J$  = 7.6 Hz, 1H), 7.89 (t,  $J$  = 7.5 Hz, 1H), 7.81 (t,  $J$  = 7.4 Hz, 1H), 3.98 (s, 4H), 3.48-3.40 (m, 4H), 1.91 (t,  $J$  = 5.2 Hz, 4H);  $^{13}\text{C}$  NMR (126 MHz,  $\text{CDCl}_3$ ):  $\delta$  175.4, 161.6, 156.9, 136.1, 134.3, 130.8, 130.1, 130.0, 127.8, 106.2, 64.4, 49.2, 35.0; **HRMS** (ESI): calculated for  $\text{C}_{16}\text{H}_{16}\text{N}_2\text{O}_5\text{Na}$   $[\text{M}+\text{Na}]^+$ : 339.0951, found: 339.0949.

### 2-(2,2,6,6-Tetramethylpiperidin-1-yl)isoquinoline-1,3,4(2*H*)-trione (3c)

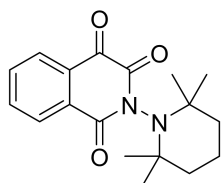

Red solid (47.1 mg, 75% yield). **Mp**: 121.0-121.5 °C; **<sup>1</sup>H NMR** (400 MHz, CDCl<sub>3</sub>): δ 8.38 (dd, *J* = 7.8, 0.8 Hz, 1H), 8.20 (dd, *J* = 7.7, 1.0 Hz, 1H), 7.91 (td, *J* = 7.6, 1.4 Hz, 1H), 7.82 (td, *J* = 7.6, 1.3 Hz, 1H), 1.85-1.77 (m, 2H), 1.68 (t, *J* = 5.9 Hz, 4H), 1.22 (s, 6H), 1.19 (s, 6H); **<sup>13</sup>C NMR** (101 MHz, CDCl<sub>3</sub>): δ 176.1, 165.4, 161.3, 136.0, 134.3, 131.2, 130.5, 130.0, 127.6, 58.3, 40.8, 28.8, 28.7, 18.3; **HRMS** (ESI): calculated for C<sub>18</sub>H<sub>22</sub>N<sub>2</sub>O<sub>3</sub>Na [M+Na]<sup>+</sup>: 337.1523, found: 337.1519.

**2-(Pyrrolidin-1-yl)isoquinoline-1,3,4(2*H*)-trione (3e)**

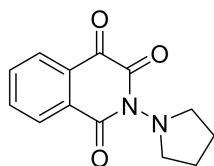

Yellow solid (27.5 mg, 56% yield). **Mp**: 157.3-158.0 °C; **<sup>1</sup>H NMR** (500 MHz, CDCl<sub>3</sub>): δ 8.35 (d, *J* = 7.8 Hz, 1H), 8.18 (d, *J* = 7.6 Hz, 1H), 7.89 (t, *J* = 7.6 Hz, 1H), 7.81 (t, *J* = 7.5 Hz, 1H), 3.34-3.29 (m, 4H), 2.05-2.01 (m, 4H); **<sup>13</sup>C NMR** (126 MHz, CDCl<sub>3</sub>): δ 175.4, 161.8, 157.1, 136.0, 134.3, 130.8, 130.1, 130.0, 127.8, 50.9, 24.5; **HRMS** (ESI): calculated for C<sub>13</sub>H<sub>12</sub>N<sub>2</sub>O<sub>3</sub>Na [M+Na]<sup>+</sup>: 267.0740, found: 267.0750.

**2-(2,5-Dihydro-1*H*-pyrrol-1-yl)isoquinoline-1,3,4(2*H*)-trione (3f)**

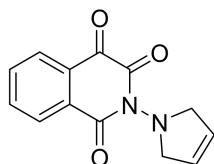

Orange solid (17.8 mg, 37% yield). **Mp**: 174.5-174.8 °C; **<sup>1</sup>H NMR** (500 MHz, CDCl<sub>3</sub>): δ 8.37 (dd, *J* = 7.8, 0.5 Hz, 1H), 8.20 (dd, *J* = 7.7, 0.8 Hz, 1H), 7.91 (td, *J* = 7.7, 1.2 Hz, 1H), 7.83 (td, *J* = 7.6, 1.1 Hz, 1H), 5.87-5.83 (m, 2H), 4.13-4.11 (m, 4H); **<sup>13</sup>C NMR** (126 MHz, CDCl<sub>3</sub>): δ 175.3, 161.8, 157.2, 136.1, 134.5, 130.9, 130.0(4), 129.9(7), 127.9, 126.1, 58.7; **HRMS** (ESI): calculated for C<sub>13</sub>H<sub>10</sub>N<sub>2</sub>O<sub>3</sub>Na [M+Na]<sup>+</sup>: 265.0584, found: 265.0587.

**2-(Piperidin-1-yl)isoquinoline-1,3,4(2*H*)-trione (3g)**

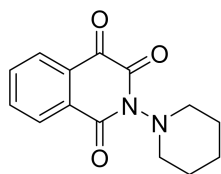

Yellow solid (24.8 mg, 48% yield). **Mp**: 114.9-115.6 °C; **<sup>1</sup>H NMR** (400 MHz, CDCl<sub>3</sub>): δ 8.34 (dd, *J* = 7.8, 0.6 Hz, 1H), 8.17 (dd, *J* = 7.7, 0.9 Hz, 1H), 7.89 (td, *J* = 7.7, 1.2 Hz, 1H), 7.80 (td, *J* = 7.6, 1.1 Hz, 1H), 3.39-3.21 (m, 4H), 1.79-1.71 (m, 4H), 1.56-1.45 (m, 2H); **<sup>13</sup>C NMR** (101 MHz, CDCl<sub>3</sub>): δ 175.6, 161.7, 157.0, 136.0, 134.2, 130.9, 130.3, 130.0, 127.7, 52.2, 26.3, 23.2; **HRMS** (ESI): calculated for C<sub>14</sub>H<sub>14</sub>N<sub>2</sub>O<sub>3</sub>Na [M+Na]<sup>+</sup>: 281.0897, found: 281.0901.

**2-(Azepan-1-yl)isoquinoline-1,3,4(2*H*)-trione (3h)**

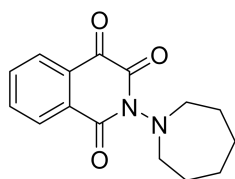

Orange solid (31.0 mg, 57% yield). **Mp**: 117.9-118.7 °C; **<sup>1</sup>H NMR** (500 MHz, CDCl<sub>3</sub>): δ 8.33 (d, *J* = 7.8 Hz, 1H), 8.16 (d, *J* = 7.7 Hz, 1H), 7.89 (t, *J* = 7.5 Hz, 1H), 7.80 (t, *J* = 7.4 Hz, 1H), 3.33-3.23 (m, 4H), 1.77-1.72 (m, 4H), 1.70-1.65 (m, 4H); **<sup>13</sup>C NMR** (126 MHz, CDCl<sub>3</sub>): δ 175.8, 161.7, 157.1, 136.0, 134.2, 130.9, 130.1, 129.9, 127.7, 55.0, 28.7, 27.5; **HRMS** (ESI): calculated for C<sub>15</sub>H<sub>16</sub>N<sub>2</sub>O<sub>3</sub>Na [M+Na]<sup>+</sup>: 295.1053, found: 295.1050.

**2-(Azocan-1-yl)isoquinoline-1,3,4(2*H*)-trione (3i)**

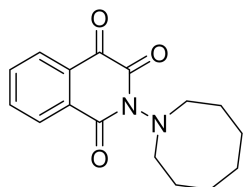

Yellow solid (39.5 mg, 69% yield). **Mp**: 117.5-118.1 °C; **<sup>1</sup>H NMR** (500 MHz, CDCl<sub>3</sub>): δ 8.35 (d, *J* = 7.8 Hz, 1H), 8.18 (d, *J* = 7.7 Hz, 1H), 7.89 (t, *J* = 7.6 Hz, 1H), 7.81 (t, *J* = 7.6 Hz, 1H), 3.29-3.24 (m, 2H), 3.23-3.16 (m, 2H), 1.97-1.88 (m, 2H), 1.73-1.68 (m, 4H), 1.67-1.61 (m, 4H); **<sup>13</sup>C NMR** (126 MHz, CDCl<sub>3</sub>): δ 175.8, 161.9, 157.3, 136.0, 134.2, 131.0, 130.2, 129.9, 127.8, 54.9, 27.8, 26.4, 25.7; **HRMS** (ESI): calculated for C<sub>16</sub>H<sub>18</sub>N<sub>2</sub>O<sub>3</sub>Na [M+Na]<sup>+</sup>: 309.1210, found: 309.1213.

**2-(Dimethylamino)isoquinoline-1,3,4(2*H*)-trione (3j)**

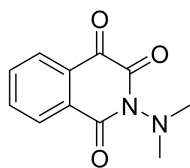

Yellow solid (16.7 mg, 38% yield). **Mp**: 175.6-176.1 °C; **<sup>1</sup>H NMR** (400 MHz, CDCl<sub>3</sub>): δ 8.35 (dd, *J* = 7.8, 0.6 Hz, 1H), 8.17 (dd, *J* = 7.7, 0.8 Hz, 1H), 7.89 (td, *J* = 7.6, 1.1 Hz, 1H), 7.81 (td, *J* = 7.6, 1.1 Hz, 1H), 3.01 (s, 6H); **<sup>13</sup>C NMR** (101 MHz, CDCl<sub>3</sub>): δ 175.3, 161.6, 156.8, 136.1, 134.4, 130.8, 130.0, 129.5, 127.8, 43.8; **HRMS** (ESI): calculated for C<sub>11</sub>H<sub>10</sub>N<sub>2</sub>O<sub>3</sub>Na [M+Na]<sup>+</sup>: 241.0584, found: 241.0590.

**2-(Diethylamino)isoquinoline-1,3,4(2H)-trione (3k)**

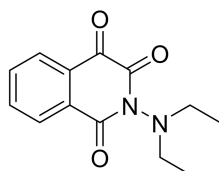

Orange solid (35.4 mg, 72% yield). **Mp**: 95.1-95.4 °C; **<sup>1</sup>H NMR** (400 MHz, CDCl<sub>3</sub>): δ 8.38 (dd, *J* = 7.8, 0.8 Hz, 1H), 8.22 (dd, *J* = 7.7, 0.9 Hz, 1H), 7.92 (td, *J* = 7.6, 1.3 Hz, 1H), 7.84 (td, *J* = 7.6, 1.2 Hz, 1H), 3.38-3.30 (m, 4H), 1.06 (t, *J* = 7.2 Hz, 6H); **<sup>13</sup>C NMR** (101 MHz, CDCl<sub>3</sub>): δ 175.2, 162.7, 157.8, 136.1, 134.4, 131.1, 130.2, 129.8, 127.8, 48.6, 12.5; **HRMS** (ESI): calculated for C<sub>13</sub>H<sub>14</sub>N<sub>2</sub>O<sub>3</sub>Na [M+Na]<sup>+</sup>: 269.0897, found: 269.0896.

**2-(Dipropylamino)isoquinoline-1,3,4(2H)-trione (3l)**

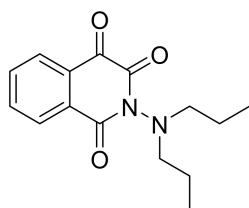

Orange liquid (49.8 mg, 91% yield). **<sup>1</sup>H NMR** (400 MHz, CDCl<sub>3</sub>): δ 8.35 (dd, *J* = 7.8, 0.8 Hz, 1H), 8.18 (dd, *J* = 7.7, 1.0 Hz, 1H), 7.90 (td, *J* = 7.6, 1.3 Hz, 1H), 7.81 (td, *J* = 7.6, 1.2 Hz, 1H), 3.21-3.14 (m, 4H), 1.45-1.38 (m, 4H), 0.89 (t, *J* = 7.4 Hz, 6H); **<sup>13</sup>C NMR** (101 MHz, CDCl<sub>3</sub>): δ 175.3, 162.4, 157.6, 136.1, 134.3, 131.0, 130.1, 129.9, 127.8, 56.7, 21.0, 11.5; **HRMS** (ESI): calculated for C<sub>15</sub>H<sub>18</sub>N<sub>2</sub>O<sub>3</sub>Na [M+Na]<sup>+</sup>: 297.1210, found: 297.1212.

**2-(Diisopropylamino)isoquinoline-1,3,4(2H)-trione (3m)**

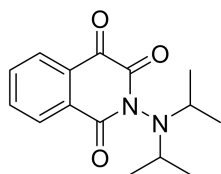

Yellow solid (54.4 mg, 99% yield). **Mp**: 93.6-94.3 °C; **<sup>1</sup>H NMR** (500 MHz, CDCl<sub>3</sub>): δ 8.36 (dd, *J* = 7.7, 0.4 Hz, 1H), 8.19 (dd, *J* = 7.7, 0.9 Hz, 1H), 7.89 (td, *J* = 7.6, 1.2 Hz, 1H), 7.81 (td, *J* = 7.6, 1.1 Hz, 1H), 3.90-3.83 (m, 2H), 1.13-1.09 (m, 12H); **<sup>13</sup>C NMR** (126 MHz, CDCl<sub>3</sub>): δ 175.8, 164.0, 159.7, 135.9, 134.2, 131.4, 130.3, 130.2, 127.7, 51.1, 21.3, 21.2; **HRMS** (ESI): calculated for C<sub>15</sub>H<sub>18</sub>N<sub>2</sub>O<sub>3</sub>Na [M+Na]<sup>+</sup>: 297.1210, found: 297.1206.

**2-(Dibutylamino)isoquinoline-1,3,4(2H)-trione (3n)**

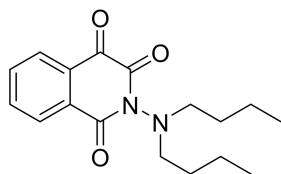

Yellow liquid (59.7 mg, 99% yield). **<sup>1</sup>H NMR** (500 MHz, CDCl<sub>3</sub>): δ 8.37 (d, *J* = 7.8 Hz, 1H), 8.19 (dd, *J* = 7.7, 0.7 Hz, 1H), 7.89 (td, *J* = 7.7, 1.2 Hz, 1H), 7.81 (td, *J* = 7.6, 1.1 Hz, 1H), 3.26-3.20 (m, 4H), 1.43-1.34 (m, 8H), 0.86 (t, *J* = 7.1 Hz, 6H); **<sup>13</sup>C NMR** (101 MHz, CDCl<sub>3</sub>): δ 175.4, 162.5, 157.6, 136.1, 134.4, 131.1, 130.2, 129.9, 127.8, 54.7, 29.8, 20.2, 13.9; **HRMS** (ESI): calculated for C<sub>17</sub>H<sub>22</sub>N<sub>2</sub>O<sub>3</sub>Na [M+Na]<sup>+</sup>: 325.1523, found: 325.1523.

**2-(Dicyclohexylamino)isoquinoline-1,3,4(2H)-trione (3o)**

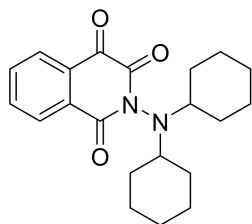

Orange solid (70.6 mg, 99% yield). **Mp**: 134.9-135.4 °C; **<sup>1</sup>H NMR** (400 MHz, CDCl<sub>3</sub>): δ 8.36 (dd, *J* = 7.8, 0.8 Hz, 1H), 8.20 (dd, *J* = 7.7, 1.0 Hz, 1H), 7.90 (td, *J* = 7.6, 1.3 Hz, 1H), 7.82 (td, *J* = 7.6, 1.2 Hz, 1H), 3.56-3.44 (m, 2H), 1.97-1.85 (m, 4H), 1.74-1.66 (m, 4H), 1.59-1.52 (m, 2H), 1.27-1.13 (m, 8H), 1.12-1.02 (m, 2H); **<sup>13</sup>C NMR** (101 MHz, CDCl<sub>3</sub>): δ 175.7, 164.1, 159.7, 136.0, 134.2, 131.2, 130.4, 130.0, 127.7, 58.6, 31.4, 31.3, 25.9, 25.5, 25.4; **HRMS** (ESI): calculated for

C<sub>21</sub>H<sub>26</sub>N<sub>2</sub>O<sub>3</sub>Na [M+Na]<sup>+</sup>: 377.1836, found: 377.1838.

**2-(Dibenzylamino)isoquinoline-1,3,4(2H)-trione (3p)**

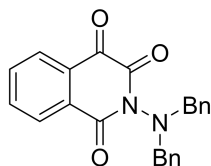

Yellow solid (57.7 mg, 78% yield). **Mp**: 131.5-132.2 °C; **<sup>1</sup>H NMR** (500 MHz, CDCl<sub>3</sub>): δ 8.24 (d, *J* = 7.7 Hz, 1H), 8.06 (d, *J* = 7.5 Hz, 1H), 7.82 (t, *J* = 7.4 Hz, 1H), 7.73 (t, *J* = 7.4 Hz, 1H), 7.48 (d, *J* = 7.3 Hz, 4H), 7.25 (t, *J* = 7.0 Hz, 4H), 7.19 (t, *J* = 7.0 Hz, 2H), 4.44 (s, 4H); **<sup>13</sup>C NMR** (126 MHz, CDCl<sub>3</sub>): δ 175.1, 162.1, 157.3, 136.6, 135.9, 134.2, 130.7, 129.8, 129.6, 129.2, 128.3, 127.7(0), 127.6(8), 58.1; **HRMS** (ESI): calculated for C<sub>23</sub>H<sub>18</sub>N<sub>2</sub>O<sub>3</sub>Na [M+Na]<sup>+</sup>: 393.1210, found: 393.1205.

**2-Morpholinoisoquinoline-1,3,4(2H)-trione (3q)**

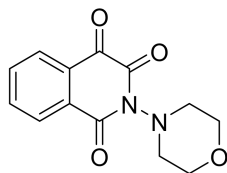

Yellow solid (25.6 mg, 49% yield). **Mp**: 227.2-228.0 °C; **<sup>1</sup>H NMR** (400 MHz, CDCl<sub>3</sub>): δ 8.37 (dd, *J* = 7.7, 0.7 Hz, 1H), 8.20 (dd, *J* = 7.6, 1.0 Hz, 1H), 7.91 (td, *J* = 7.6, 1.3 Hz, 1H), 7.83 (td, *J* = 7.6, 1.1 Hz, 1H), 3.89-3.85 (m, 4H), 3.45-3.36 (m, 4H); **<sup>13</sup>C NMR** (126 MHz, CDCl<sub>3</sub>): δ 174.3, 160.6, 155.8, 135.2, 133.5, 129.9, 129.1, 129.0, 126.9, 66.2, 50.4; **HRMS** (ESI): calculated for C<sub>13</sub>H<sub>12</sub>N<sub>2</sub>O<sub>4</sub>Na [M+Na]<sup>+</sup>: 283.0689, found: 283.0688.

**Ethyl 4-(1,3,4-trioxo-3,4-dihydroisoquinolin-2(1H)-yl)piperazine-1-carboxylate (3r)**

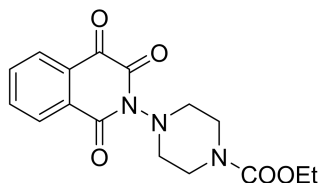

Yellow solid (29.0 mg, 44% yield). **Mp**: 170.6-171.6 °C; **<sup>1</sup>H NMR** (400 MHz, CDCl<sub>3</sub>): δ 8.33 (d, *J* = 7.4 Hz, 1H), 8.18 (dd, *J* = 7.6, 0.7 Hz, 1H), 7.90 (td, *J* = 7.6, 1.2 Hz, 1H), 7.82 (td, *J* = 7.6, 1.0 Hz, 1H), 4.14 (q, *J* = 7.1 Hz, 2H), 3.80-3.52 (m, 4H), 3.44-3.20 (m, 4H), 1.26 (t, *J* = 7.1 Hz, 3H);

**<sup>13</sup>C NMR** (101 MHz, CDCl<sub>3</sub>): δ 175.2, 161.6, 156.8, 155.2, 136.1, 134.5, 130.8, 130.0, 129.9, 127.9, 61.5, 50.8, 44.0, 14.6; **HRMS** (ESI): calculated for C<sub>16</sub>H<sub>17</sub>N<sub>3</sub>O<sub>5</sub>Na [M+Na]<sup>+</sup>: 354.1060, found: 354.1044.

**3',4'-Dihydro-1*H*,1'*H*-[2,2'-biisoquinoline]-1,3,4-trione (3s)**

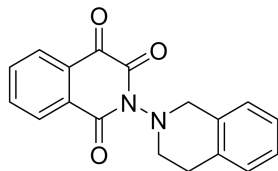

Yellow solid (25.3 mg, 41% yield). **Mp**: 214.6-215.3 °C; **<sup>1</sup>H NMR** (400 MHz, CDCl<sub>3</sub>): δ 8.37 (dd, *J* = 7.8, 0.8 Hz, 1H), 8.21 (dd, *J* = 7.7, 1.0 Hz, 1H), 7.91 (td, *J* = 7.6, 1.3 Hz, 1H), 7.83 (td, *J* = 7.6, 1.2 Hz, 1H), 7.17-7.12 (m, 3H), 7.01-6.97 (m, 1H), 4.53 (s, 2H), 3.75-3.57 (m, 2H), 3.14-3.05 (m, 2H); **<sup>13</sup>C NMR** (101 MHz, CDCl<sub>3</sub>): δ 175.4, 161.7, 157.0, 136.1, 134.4, 133.5, 133.4, 130.9, 130.1, 128.8, 127.9, 126.4, 126.3, 125.8, 52.1, 49.8, 30.5; **HRMS** (ESI): calculated for C<sub>18</sub>H<sub>14</sub>N<sub>2</sub>O<sub>3</sub>Na [M+Na]<sup>+</sup>: 329.0897, found: 329.0899.

**2-(Isoindolin-2-yl)isoquinoline-1,3,4(2*H*)-trione (3t)**

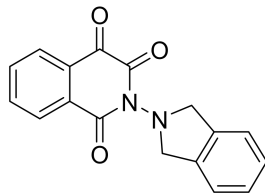

Orange solid (16.4 mg, 28% yield). The <sup>1</sup>H NMR data listed here represent peak information only for the major isomer. The <sup>13</sup>C NMR data listed here represent peak information for the mixture. **Mp**: 230.3-230.6 °C; **<sup>1</sup>H NMR** (400 MHz, CDCl<sub>3</sub>): δ 8.38 (d, *J* = 7.7 Hz, 1H), 8.23 (dd, *J* = 7.6, 0.9 Hz, 1H), 7.91 (td, *J* = 7.6, 1.3 Hz, 1H), 7.84 (td, *J* = 7.6, 1.2 Hz, 1H), 7.25-7.19 (m, 4H), 4.69 (s, 4H); **<sup>13</sup>C NMR** (126 MHz, CDCl<sub>3</sub>): δ 175.3, 175.1, 161.8, 161.6, 157.2, 155.8, 137.4, 136.2, 136.1, 134.9, 134.6, 131.4, 130.9, 130.2, 130.0, 129.5, 129.2, 128.3, 128.1, 127.2, 127.1, 122.5, 122.4, 57.2. **HRMS** (ESI): calculated for C<sub>17</sub>H<sub>12</sub>N<sub>2</sub>O<sub>3</sub>Na [M+Na]<sup>+</sup>: 315.0740, found: 315.0741.

**2-(4-(2-((2,4-Dimethylphenyl)thio)phenyl)piperazin-1-yl)isoquinoline-1,3,4(2*H*)-trione (3x)**

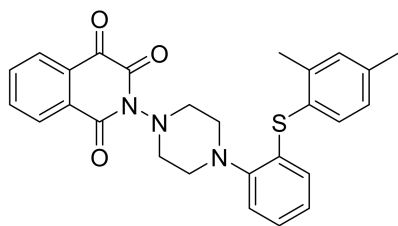

Yellow solid (39.3 mg, 42% yield). **Mp**: 122.6-123.1 °C; **<sup>1</sup>H NMR** (400 MHz, CDCl<sub>3</sub>): δ 8.39 (d, *J* = 7.7 Hz, 1H), 8.21 (d, *J* = 7.4 Hz, 1H), 7.95-7.90 (m, 1H), 7.86-7.80 (m, 1H), 7.40 (d, *J* = 7.8 Hz, 1H), 7.14 (d, *J* = 9.2 Hz, 2H), 7.10-7.02 (m, 2H), 6.91-6.85 (m, 1H), 6.54 (d, *J* = 7.8 Hz, 1H), 3.68-3.56 (m, 4H), 3.35-3.27 (m, 4H), 2.36 (s, 3H), 2.34 (s, 3H); **<sup>13</sup>C NMR** (101 MHz, CDCl<sub>3</sub>): δ 175.4, 161.8, 156.9, 148.7, 142.5, 139.2, 136.3, 136.1, 134.9, 134.4, 131.7, 130.9, 130.2, 130.0, 127.9, 127.8(4), 127.7(5), 126.1, 125.4, 124.6, 120.1, 51.9, 51.5, 21.2, 20.6; **HRMS** (ESI): calculated for C<sub>27</sub>H<sub>25</sub>N<sub>3</sub>O<sub>3</sub>SNa [M+Na]<sup>+</sup>: 494.1509, found: 494.1497.

**(*S*)-2-(8-Chloro-1-methyl-1,2,4,5-tetrahydro-3*H*-benzo[*d*]azepin-3-yl)isoquinoline-1,3,4(2*H*)-trione (3y)**

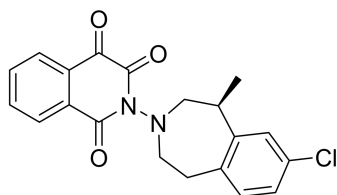

Yellow solid (43.1 mg, 59% yield). The <sup>1</sup>H NMR data listed here represent peak information only for the major isomer. The <sup>13</sup>C NMR data listed here represent peak information for the mixture. **Mp**: 184.2-185.0 °C; **<sup>1</sup>H NMR** (400 MHz, CDCl<sub>3</sub>): δ 8.39-8.29 (m, 1H), 8.18 (d, *J* = 7.7 Hz, 1H), 7.93-7.87 (m, 1H), 7.82 (t, *J* = 7.5 Hz, 1H), 7.15 (d, *J* = 1.7 Hz, 1H), 7.14-7.09 (m, 1H), 7.04 (d, *J* = 8.0 Hz, 1H), 3.47-3.28 (m, 4H), 3.25-3.17 (m, 1H), 3.15-2.98 (m, 2H), 1.44 (t, *J* = 7.7 Hz, 3H); **<sup>13</sup>C NMR** (101 MHz, CDCl<sub>3</sub>): δ 175.6, 175.5, 161.6, 161.5, 156.8, 156.7, 146.5(8), 146.5(6), 138.6(1), 138.5(9), 136.1, 134.4, 132.2, 131.2, 131.1, 130.9, 130.1, 129.9(9), 129.9(6), 127.9, 127.1, 126.9, 126.2, 61.4, 61.3, 55.0, 54.9, 39.6, 39.3, 35.6, 35.5, 17.8(4), 17.7(8); **HRMS** (ESI): calculated for C<sub>20</sub>H<sub>17</sub>N<sub>2</sub>O<sub>3</sub>ClNa [M+Na]<sup>+</sup>: 391.0820, found: 391.0821.

**2-(Diisopropylamino)-7-fluoroisoquinoline-1,3,4(2*H*)-trione (3mb) and 2-(diisopropylamino)-6-fluoroisoquinoline-1,3,4(2*H*)-trione (3mb')**

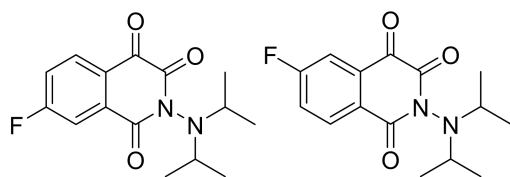

Orange solid (50.0 mg, 86% yield). By  $^1\text{H}$  NMR, the ratio of two regioisomers was determined to be approximately 5:2. The NMR data listed here represent peak information for the mixture.  **$^1\text{H}$  NMR** (500 MHz,  $\text{CDCl}_3$ ):  $\delta$  8.40 (dd,  $J = 8.7, 5.0$  Hz, 1H), 8.25 (dd,  $J = 8.6, 5.2$  Hz, 0.4H), 8.01 (dd,  $J = 8.5, 2.5$  Hz, 0.4H), 7.82 (dd,  $J = 7.6, 2.6$  Hz, 1H), 7.58 (td,  $J = 8.2, 2.6$  Hz, 1H), 7.50 (td,  $J = 8.2, 2.5$  Hz, 0.4H), 3.90-3.84 (m, 2.8H), 1.11-1.06 (m, 16.8H);  **$^{13}\text{C}$  NMR** (126 MHz,  $\text{CDCl}_3$ ):  $\delta$  174.8, 174.1, 167.4 ( $J = 261.8$  Hz), 166.0 ( $J = 260.1$  Hz), 163.0, 162.9, 159.2, 159.1, 133.5 ( $J = 9.0$  Hz), 133.4 ( $J = 8.2$  Hz), 133.0 ( $J = 9.2$  Hz), 131.1 ( $J = 9.6$  Hz), 127.8 ( $J = 2.9$  Hz), 126.3 ( $J = 3.1$  Hz), 123.7 ( $J = 22.7$  Hz), 122.1 ( $J = 22.9$  Hz), 117.2 ( $J = 24.6$  Hz), 114.0 ( $J = 23.5$  Hz), 50.8, 21.1, 21.0(2), 20.9(9);  **$^{19}\text{F}$  NMR** (470 MHz,  $\text{CDCl}_3$ ):  $\delta$  -96.68, -100.82; **HRMS** (ESI): calculated for  $\text{C}_{15}\text{H}_{17}\text{N}_2\text{O}_3\text{FNa}$   $[\text{M}+\text{Na}]^+$ : 315.1115, found: 315.1110.

**7-Chloro-2-(diisopropylamino)isoquinoline-1,3,4(2H)-trione (3mc) and 6-chloro-2-(diisopropylamino)isoquinoline-1,3,4(2H)-trione (3mc')**

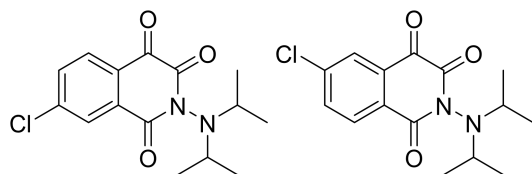

Orange solid (50.7 mg, 82% yield). By  $^1\text{H}$  NMR, the ratio of two regioisomers was determined to be approximately 2:1. The NMR data listed here represent peak information for the mixture.  **$^1\text{H}$  NMR** (500 MHz,  $\text{CDCl}_3$ ):  $\delta$  8.32 (d,  $J = 2.0$  Hz, 0.5H), 8.30 (d,  $J = 8.4$  Hz, 1H), 8.17-8.11 (m, 1.5H), 7.85 (dd,  $J = 8.4, 2.1$  Hz, 1H), 7.77 (dd,  $J = 8.3, 2.0$  Hz, 0.5H), 3.90-3.83 (m, 3H), 1.11-1.06 (m, 18H);  **$^{13}\text{C}$  NMR** (126 MHz,  $\text{CDCl}_3$ ):  $\delta$  174.8, 174.5, 163.1, 163.0, 159.1, 159.0, 143.5, 141.5, 136.2, 134.6, 132.1, 131.9, 131.3, 130.3, 129.3, 129.2, 128.1, 127.4, 50.8, 50.7, 21.0(9), 21.0(7), 21.0(1), 20.9(9); **HRMS** (ESI): calculated for  $\text{C}_{15}\text{H}_{17}\text{N}_2\text{O}_3\text{ClNa}$   $[\text{M}+\text{Na}]^+$ : 331.0820, found: 331.0821.

**7-Bromo-2-(diisopropylamino)isoquinoline-1,3,4(2H)-trione (3md) and 6-bromo-2-(diisopr**

**opylamino)isoquinoline-1,3,4(2H)-trione (3md')**

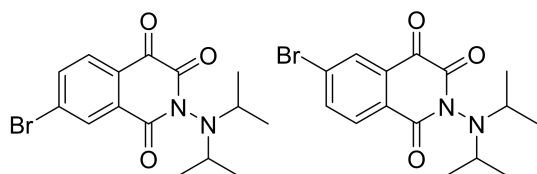

Orange solid (62.2 mg, 88% yield). By  $^1\text{H}$  NMR, the ratio of two regioisomers was determined to be approximately 5:3. The NMR data listed here represent peak information for the mixture.  **$^1\text{H}$  NMR** (400 MHz,  $\text{CDCl}_3$ ):  $\delta$  8.50 (d,  $J = 1.5$  Hz, 0.6H), 8.30 (d,  $J = 1.7$  Hz, 1H), 8.22 (d,  $J = 8.4$  Hz, 1H), 8.04 (d,  $J = 8.3$  Hz, 0.6H), 8.01 (dd,  $J = 8.4, 1.8$  Hz, 1H), 7.94 (dd,  $J = 8.2, 1.7$  Hz, 0.6H), 3.90-3.83 (m, 3.2H), 1.11-1.06 (m, 19.2H);  **$^{13}\text{C}$  NMR** (101 MHz,  $\text{CDCl}_3$ ):  $\delta$  174.8, 174.7, 163.3, 162.9, 159.1, 159.0, 139.1, 137.6, 133.3, 132.1, 132.0, 131.9, 131.1, 130.4, 129.9, 129.7, 129.0, 128.5, 50.8, 21.0(8), 21.0(6), 21.0; **HRMS** (ESI): calculated for  $\text{C}_{15}\text{H}_{17}\text{N}_2\text{O}_3\text{BrNa}$   $[\text{M}+\text{Na}]^+$ : 375.0315, found: 375.0322.

**2-(Diisopropylamino)-8-fluoroisoquinoline-1,3,4(2H)-trione (3me) and 2-(diisopropylamino)-5-fluoroisoquinoline-1,3,4(2H)-trione (3me')**

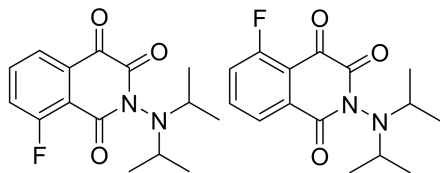

Orange solid (42.0 mg, 72% yield). By  $^1\text{H}$  NMR, the ratio of two regioisomers was determined to be approximately 5:3. The NMR data listed here represent peak information for the mixture.  **$^1\text{H}$  NMR** (500 MHz,  $\text{CDCl}_3$ ):  $\delta$  8.22 (d,  $J = 7.8$  Hz, 0.6H), 8.05 (d,  $J = 7.7$  Hz, 1H), 7.88 (td,  $J = 8.1, 4.9$  Hz, 0.6H), 7.81 (td,  $J = 8.0, 4.4$  Hz, 1H), 7.64-7.58 (m, 1H), 7.51 (t,  $J = 9.0$  Hz, 0.6H), 3.89-3.83 (m, 3.2H), 1.11-1.06 (m, 19.2H);  **$^{13}\text{C}$  NMR** (126 MHz,  $\text{CDCl}_3$ ):  $\delta$  175.2(2), 175.1(9), 163.1 ( $J = 3.3$  Hz), 162.5 ( $J = 270.8$  Hz), 161.4 ( $J = 272.5$  Hz), 160.7 ( $J = 5.5$  Hz), 158.9, 158.8, 137.4 ( $J = 9.9$  Hz), 135.7 ( $J = 9.9$  Hz), 132.4, 131.3, 126.6 ( $J = 3.6$  Hz), 125.2 ( $J = 22.5$  Hz), 124.2 ( $J = 3.9$  Hz), 122.6 ( $J = 20.4$  Hz), 119.5 ( $J = 7.2$  Hz), 117.3 ( $J = 3.9$  Hz), 50.8, 50.7, 21.1(4), 21.1(0), 21.0(8), 21.0;  **$^{19}\text{F}$  NMR** (376 MHz,  $\text{CDCl}_3$ ):  $\delta$  -106.69, -108.36; **HRMS** (ESI): calculated for  $\text{C}_{15}\text{H}_{17}\text{N}_2\text{O}_3\text{FNa}$   $[\text{M}+\text{Na}]^+$ : 315.1115, found: 315.1113.

**8-Chloro-2-(diisopropylamino)isoquinoline-1,3,4(2H)-trione (3mf) and 5-chloro-2-(diisopropylamino)isoquinoline-1,3,4(2H)-trione (3mf')**

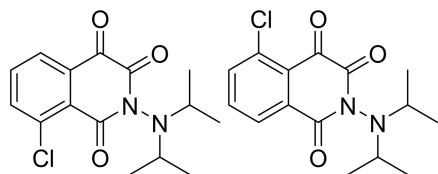

Orange liquid (37.5 mg, 61% yield). By  $^1\text{H}$  NMR, the ratio of two regioisomers was determined to be approximately 4:1. The NMR data listed here represent peak information for the mixture.  $^1\text{H}$  NMR (500 MHz,  $\text{CDCl}_3$ ):  $\delta$  8.34 (dd,  $J = 7.5, 1.4$  Hz, 0.25H), 8.16 (dd,  $J = 7.7, 1.0$  Hz, 1H), 7.92 (dd,  $J = 8.0, 1.0$  Hz, 1H), 7.81 (dd,  $J = 8.0, 1.4$  Hz, 0.25H), 7.77 (t,  $J = 7.8$  Hz, 0.25H), 7.71 (t,  $J = 7.9$  Hz, 1H), 3.90-3.83 (m, 2.5H), 1.13-1.07 (m, 15H);  $^{13}\text{C}$  NMR (126 MHz,  $\text{CDCl}_3$ ):  $\delta$  175.9, 174.0, 163.2, 161.9, 159.3, 158.6, 139.7, 137.5, 137.2, 136.0, 135.3, 133.9, 133.2, 132.4, 129.4, 127.9, 127.0, 126.4, 50.8, 50.7, 21.1(3), 21.0(5), 21.0; HRMS (ESI): calculated for  $\text{C}_{15}\text{H}_{17}\text{N}_2\text{O}_3\text{ClNa}$   $[\text{M}+\text{Na}]^+$ : 331.0820, found: 331.0814.

**8-Bromo-2-(diisopropylamino)isoquinoline-1,3,4(2H)-trione (3mg) and 5-bromo-2-(diisopropylamino)isoquinoline-1,3,4(2H)-trione (3mg')**

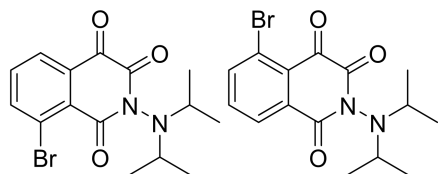

Orange liquid (48.7 mg, 69% yield). By  $^1\text{H}$  NMR, the ratio of two regioisomers was determined to be approximately 4:1. The NMR data listed here represent peak information for the mixture.  $^1\text{H}$  NMR (400 MHz,  $\text{CDCl}_3$ ):  $\delta$  8.39 (dd,  $J = 7.8, 1.2$  Hz, 0.25H), 8.19 (dd,  $J = 7.7, 1.3$  Hz, 1H), 8.16 (dd,  $J = 8.0, 1.3$  Hz, 1H), 8.03 (dd,  $J = 8.0, 1.2$  Hz, 0.25H), 7.67 (t,  $J = 7.9$  Hz, 0.25H), 7.61 (t,  $J = 7.8$  Hz, 1H), 3.91-3.82 (m, 2.5H), 1.13-1.07 (m, 15H);  $^{13}\text{C}$  NMR (101 MHz,  $\text{CDCl}_3$ ):  $\delta$  176.0, 174.4, 163.2, 162.2, 159.2, 158.6, 143.2, 140.8, 135.3, 133.9, 133.5, 132.8, 130.1, 129.2, 127.9, 127.6, 125.2, 123.5, 50.9, 50.8, 21.2, 21.1, 21.0; HRMS (ESI): calculated for  $\text{C}_{15}\text{H}_{17}\text{N}_2\text{O}_3\text{BrNa}$   $[\text{M}+\text{Na}]^+$ : 375.0315, found: 375.0317.

**2-(Diisopropylamino)-7-methylisoquinoline-1,3,4(2H)-trione (3mh) and 2-(diisopropylamin**

**o)-6-methylisoquinoline-1,3,4(2*H*)-trione (3mh')**

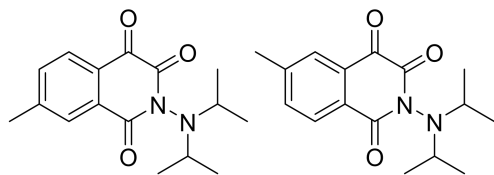

Orange solid (51.3 mg, 89% yield). By  $^1\text{H}$  NMR, the ratio of two regioisomers was determined to be approximately 4:3. The NMR data listed here represent peak information for the mixture.  **$^1\text{H}$  NMR** (500 MHz,  $\text{CDCl}_3$ ):  $\delta$  8.23 (d,  $J = 8.0$  Hz, 1H), 8.16-8.13 (m, 0.75H), 8.08 (d,  $J = 7.9$  Hz, 0.75H), 8.00-7.97 (m, 1H), 7.69 (d,  $J = 8.0$  Hz, 1H), 7.61 (d,  $J = 7.9$  Hz, 0.75H), 3.89-3.84 (m, 3.5H), 2.55 (s, 2.25H), 2.52 (s, 3H), 1.10-1.06 (m, 21H);  **$^{13}\text{C}$  NMR** (126 MHz,  $\text{CDCl}_3$ ):  $\delta$  175.8, 175.2, 164.1, 163.9, 159.7(0), 159.6(6), 148.0, 145.7, 137.0, 135.1, 131.0, 130.6, 130.4, 129.9, 128.9, 127.9, 127.8, 127.5, 50.6(8), 50.6(6), 22.1, 21.6, 21.1, 21.0(2), 21.0(0); **HRMS** (ESI): calculated for  $\text{C}_{16}\text{H}_{20}\text{N}_2\text{O}_3\text{Na}$   $[\text{M}+\text{Na}]^+$ : 311.1366, found: 311.1369.

**2-(Diisopropylamino)-7-methoxyisoquinoline-1,3,4(2*H*)-trione (3mi) and 2-(diisopropylamino)-6-methoxyisoquinoline-1,3,4(2*H*)-trione (3mi')**

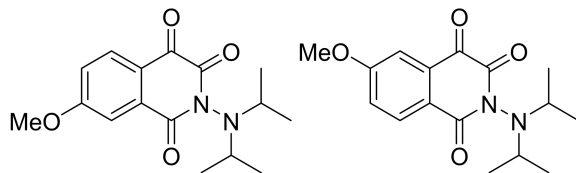

Orange solid (41.5 mg, 68% yield). By  $^1\text{H}$  NMR, the ratio of two regioisomers was determined to be approximately 3:1. The NMR data listed here represent peak information for the mixture.  **$^1\text{H}$  NMR** (500 MHz,  $\text{CDCl}_3$ ):  $\delta$  8.25 (d,  $J = 8.7$  Hz, 1H), 8.13 (d,  $J = 8.7$  Hz, 0.33H), 7.76 (d,  $J = 2.5$  Hz, 0.33H), 7.57 (d,  $J = 2.6$  Hz, 1H), 7.36 (dd,  $J = 8.7, 2.6$  Hz, 1H), 7.27-7.25 (m, 0.33H), 3.99 (s, 1H), 3.95 (s, 3H), 3.89-3.83 (m, 2.66H), 1.10-1.06 (m, 15.96H);  **$^{13}\text{C}$  NMR** (126 MHz,  $\text{CDCl}_3$ ):  $\delta$  175.7, 173.9, 166.0, 164.2, 164.0, 163.6, 159.9, 159.7, 132.8, 132.4, 132.3, 130.3, 124.6, 123.7, 122.8, 121.5, 113.3, 109.7, 56.2(3), 56.1(7), 50.6(9), 50.6(6), 21.0(8), 21.0(6), 21.0(3), 21.0(0); **HRMS** (ESI): calculated for  $\text{C}_{16}\text{H}_{20}\text{N}_2\text{O}_4\text{Na}$   $[\text{M}+\text{Na}]^+$ : 327.1315, found: 327.1317.

**2-(Diisopropylamino)-6,7-dimethoxyisoquinoline-1,3,4(2*H*)-trione (3mj)**

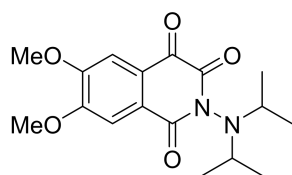

Yellow liquid (46.8 mg, 70% yield). **<sup>1</sup>H NMR** (500 MHz, CDCl<sub>3</sub>): δ 7.68 (s, 1H), 7.51 (s, 1H), 4.03 (s, 3H), 3.98 (s, 3H), 3.84-3.79 (m, 2H), 1.07-1.02 (m, 12H); **<sup>13</sup>C NMR** (126 MHz, CDCl<sub>3</sub>): δ 174.2, 163.8, 159.8, 155.6, 153.8, 125.5, 124.8, 111.0, 108.0, 56.7, 56.6, 50.6, 21.0, 20.9; **HRMS** (ESI): calculated for C<sub>17</sub>H<sub>22</sub>N<sub>2</sub>O<sub>5</sub>Na [M+Na]<sup>+</sup>: 357.1421, found: 357.1423.

**6-(Diisopropylamino)-[1,3]dioxolo[4,5-g]isoquinoline-5,7,8(6*H*)-trione (3mk)**

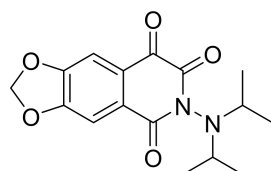

Yellow solid (35.1 mg, 55% yield). **Mp**: 122.8-123.6 °C; **<sup>1</sup>H NMR** (500 MHz, CDCl<sub>3</sub>): δ 7.68 (s, 1H), 7.50 (s, 1H), 6.21 (s, 2H), 3.88-3.82 (m, 2H), 1.10-1.05 (m, 12H); **<sup>13</sup>C NMR** (126 MHz, CDCl<sub>3</sub>): δ 173.9, 163.3, 159.4, 154.6, 152.9, 128.0, 127.5, 109.2, 106.0, 103.4, 50.7, 21.0(4), 20.9(8); **HRMS** (ESI): calculated for C<sub>16</sub>H<sub>18</sub>N<sub>2</sub>O<sub>5</sub>Na [M+Na]<sup>+</sup>: 341.1108, found: 341.1108.

**2-((*cis*-2,6-Dimethylpiperidin-1-yl)(oxo)ammonio)-1,3-dimethoxy-1,3-dioxopropan-2-ide (4a)**

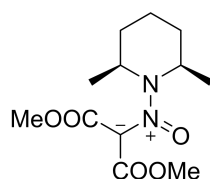

Pale Yellow solid (36.2 mg, 67% yield). **<sup>1</sup>H NMR** (400 MHz, CDCl<sub>3</sub>): δ 3.86 (s, 3H), 3.83 (s, 3H), 3.08-3.00 (m, 2H), 1.76-1.71 (m, 2H), 1.43-1.22 (m, 4H), 1.09 (d, *J* = 6.2 Hz, 6H); **<sup>13</sup>C NMR** (101 MHz, CDCl<sub>3</sub>): δ 160.9, 159.2, 128.3, 58.5, 52.8, 52.7, 33.5, 23.7, 18.5; **HRMS** (ESI): calculated for C<sub>12</sub>H<sub>20</sub>N<sub>2</sub>O<sub>5</sub>Na [M+Na]<sup>+</sup>: 295.1264, found: 295.1273.

**1,3-Dimethoxy-2-((2-methylpiperidin-1-yl)(oxo)ammonio)-1,3-dioxopropan-2-ide (4b)**

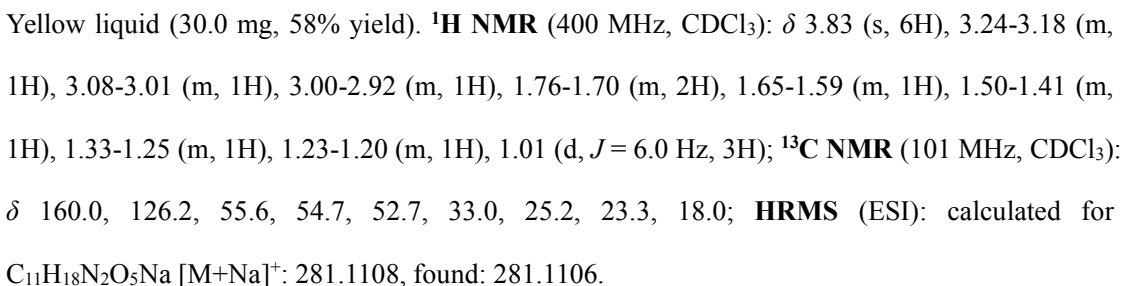CCN(CC)C(=O)OC1C(=O)OC(=O)C1

**1,3-Dimethoxy-1,3-dioxo-2-(1-oxo-2,2-dipropylhydrazin-1-ium-1-yl)propan-2-ide (4d)**

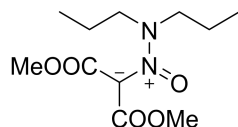

**Methyl 2-(diisopropylamino)-1-hydroxy-3-oxoisindoline-1-carboxylate (5)**

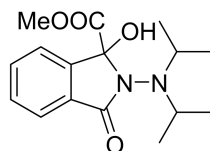

White solid (142.1 mg, 93% yield). **Mp**: 127.6-128.3 °C; **<sup>1</sup>H NMR** (400 MHz, CDCl<sub>3</sub>): δ 7.78 (d, *J* = 6.7 Hz, 1H), 7.58 (td, *J* = 7.5, 1.3 Hz, 1H), 7.53 (td, *J* = 7.5, 1.2 Hz, 1H), 7.38 (d, *J* = 7.2 Hz,

1H), 4.77 (s, 1H), 3.71 (s, 3H), 3.69-3.62 (m, 1H), 3.54-3.47 (m, 1H), 1.28 (d,  $J = 6.6$  Hz, 3H), 1.21 (d,  $J = 6.4$  Hz, 3H), 1.07-1.03 (m, 6H);  $^{13}\text{C}$  NMR (101 MHz,  $\text{CDCl}_3$ ):  $\delta$  171.2, 168.3, 141.4, 132.7, 130.8, 130.2, 123.5, 122.2, 87.7, 55.8, 53.5, 52.3, 24.3, 22.9, 22.5, 21.6; **HRMS** (ESI): calculated for  $\text{C}_{16}\text{H}_{22}\text{N}_2\text{O}_4\text{Na}$   $[\text{M}+\text{Na}]^+$ : 329.1472, found: 329.1472.

**2-(Diisopropylamino)-4-ethoxy-4-hydroxyisoquinoline-1,3(2H,4H)-dione (6)**

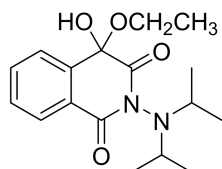

Yellow liquid (47.8 mg, 75% yield).  $^1\text{H}$  NMR (500 MHz,  $\text{CDCl}_3$ ):  $\delta$  7.77 (d,  $J = 7.4$  Hz, 1H), 7.57 (t,  $J = 7.1$  Hz, 1H), 7.52 (t,  $J = 7.3$  Hz, 1H), 7.36 (d,  $J = 7.4$  Hz, 1H), 4.79 (s, 1H), 4.28-4.20 (m, 1H), 4.15-4.08 (m, 1H), 3.70-3.63 (m, 1H), 3.55-3.48 (m, 1H), 1.29 (d,  $J = 6.6$  Hz, 3H), 1.21 (d,  $J = 6.4$  Hz, 3H), 1.12 (t,  $J = 7.1$  Hz, 3H), 1.08-1.03 (m, 6H);  $^{13}\text{C}$  NMR (126 MHz,  $\text{CDCl}_3$ ):  $\delta$  170.7, 168.4, 141.7, 132.6, 130.8, 130.1, 123.4, 122.0, 87.7, 63.1, 55.9, 52.2, 24.4, 23.1, 22.4, 21.6, 13.7; **HRMS** (ESI): calculated for  $\text{C}_{17}\text{H}_{24}\text{N}_2\text{O}_4\text{Na}$   $[\text{M}+\text{Na}]^+$ : 343.1628, found: 343.1628.

**(Z)-N-(cis-2,6-Dimethylpiperidin-1-yl)-2-ethoxy-2-oxoethan-1-imine oxide (7)**

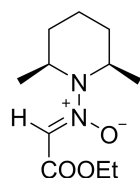

Yellow liquid (6.8 mg, 15% yield).  $^1\text{H}$  NMR (500 MHz,  $\text{CDCl}_3$ ):  $\delta$  7.16 (s, 1H), 4.29-4.24 (m, 2H), 3.11-3.03 (m, 2H), 1.77-1.72 (m, 2H), 1.37-1.29 (m, 7H), 1.02 (d,  $J = 6.0$  Hz, 6H);  $^{13}\text{C}$  NMR (126 MHz,  $\text{CDCl}_3$ ):  $\delta$  160.5, 122.2, 61.1, 56.3, 33.4, 23.5, 19.4, 14.1; **HRMS** (ESI): calculated for  $\text{C}_{11}\text{H}_{20}\text{N}_2\text{O}_3\text{Na}$   $[\text{M}+\text{Na}]^+$ : 251.1366, found: 251.1367.

## 9. X-ray structure of the products

### 9.1 X-ray structure of **3a**

The structure of **3a** was determined by single crystal X-ray analysis (ellipsoid contour at 50% probability). **CCDC 2289572** contains the supplementary crystallographic data for this structure. These data can be obtained free of charge from The Cambridge Crystallographic Data Centre.

#### Experimental

Single crystals of **3a** (C<sub>16</sub>H<sub>18</sub>N<sub>2</sub>O<sub>3</sub>) were grown by slow evaporation in petroleum ether/CH<sub>2</sub>Cl<sub>2</sub> under an air atmosphere. A suitable crystal was selected and mounted on a XtaLAB Synergy R, DW system, HyPix diffractometer. The crystal was kept at 100.00(10) K during data collection. Using Olex2, the structure was solved with the ShelXT structure solution program using Intrinsic Phasing and refined with the ShelXL refinement package using Least Squares minimisation.

#### Crystal structure determination of **3a**

Crystal Data for C<sub>16</sub>H<sub>18</sub>N<sub>2</sub>O<sub>3</sub> (*M* = 286.32 g/mol): triclinic, space group P-1 (no. 2), *a* = 7.2046(3) Å, *b* = 7.9726(4) Å, *c* = 14.0906(6) Å, *α* = 94.512(4)°, *β* = 100.887(4)°, *γ* = 112.127(4)°, *V* = 726.20(6) Å<sup>3</sup>, *Z* = 2, *T* = 100.00(10) K, *μ*(Cu Kα) = 0.746 mm<sup>-1</sup>, *D*<sub>calc</sub> = 1.309 g/cm<sup>3</sup>, 7556 reflections measured (6.476° ≤ 2Θ ≤ 150.518°), 2855 unique (*R*<sub>int</sub> = 0.0287, *R*<sub>sigma</sub> = 0.0361) which were used in all calculations. The final *R*<sub>1</sub> was 0.0850 (*I* > 2σ(*I*)) and *wR*<sub>2</sub> was 0.2466 (all data).

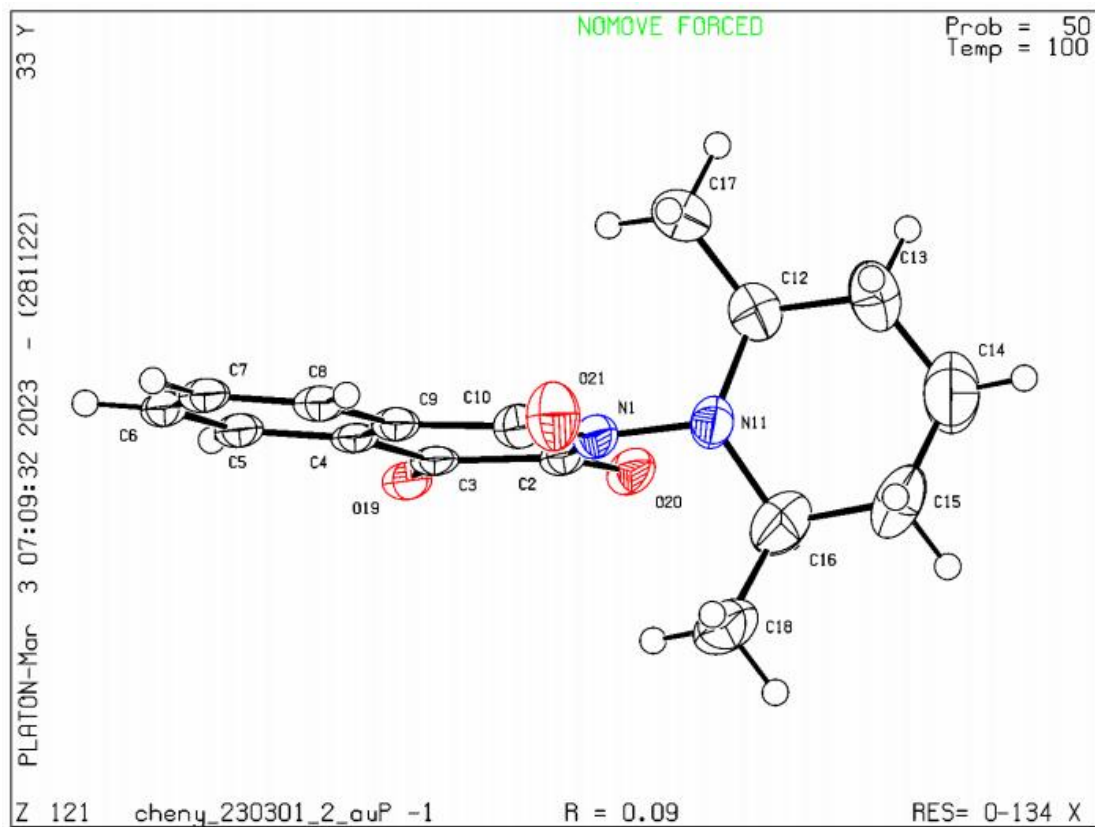

## 9.2 X-ray structure of 4a

The structure of **4a** was determined by single crystal X-ray analysis (ellipsoid contour at 50% probability). **CCDC 2290196** contains the supplementary crystallographic data for this structure. These data can be obtained free of charge from The Cambridge Crystallographic Data Centre.

### Experimental

Single crystals of **4a** ( $\text{C}_{12}\text{H}_{20}\text{N}_2\text{O}_5$ ) were grown by slow evaporation in petroleum ether/ $\text{CH}_2\text{Cl}_2$  under an air atmosphere. A suitable crystal was selected and mounted on a XtaLAB Synergy R, DW system, HyPix diffractometer. The crystal was kept at 100.00(10) K during data collection. Using Olex2, the structure was solved with the ShelXT structure solution program using Intrinsic Phasing and refined with the ShelXL refinement package using Least Squares minimisation.

### Crystal structure determination of 4a

Crystal data for  $\text{C}_{12}\text{H}_{20}\text{N}_2\text{O}_5$  ( $M = 272.30$  g/mol): monoclinic, space group  $\text{P2}_1/\text{n}$  (no. 14),  $a = 7.78740(10)$  Å,  $b = 21.7474(2)$  Å,  $c = 8.41450(10)$  Å,  $\beta = 100.6710(10)^\circ$ ,  $V = 1400.40(3)$  Å<sup>3</sup>,  $Z = 4$ ,  $T = 100.00(10)$  K,  $\mu(\text{Cu K}\alpha) = 0.845$  mm<sup>-1</sup>,  $D_{\text{calc}} = 1.292$  g/cm<sup>3</sup>, 28400 reflections measured ( $8.132^\circ \leq 2\theta \leq 157.086^\circ$ ), 2992 unique ( $R_{\text{int}} = 0.0446$ ,  $R_{\text{sigma}} = 0.0213$ ) which were used in all calculations. The final  $R_1$  was 0.0331 ( $I > 2\sigma(I)$ ) and  $wR_2$  was 0.0872 (all data).

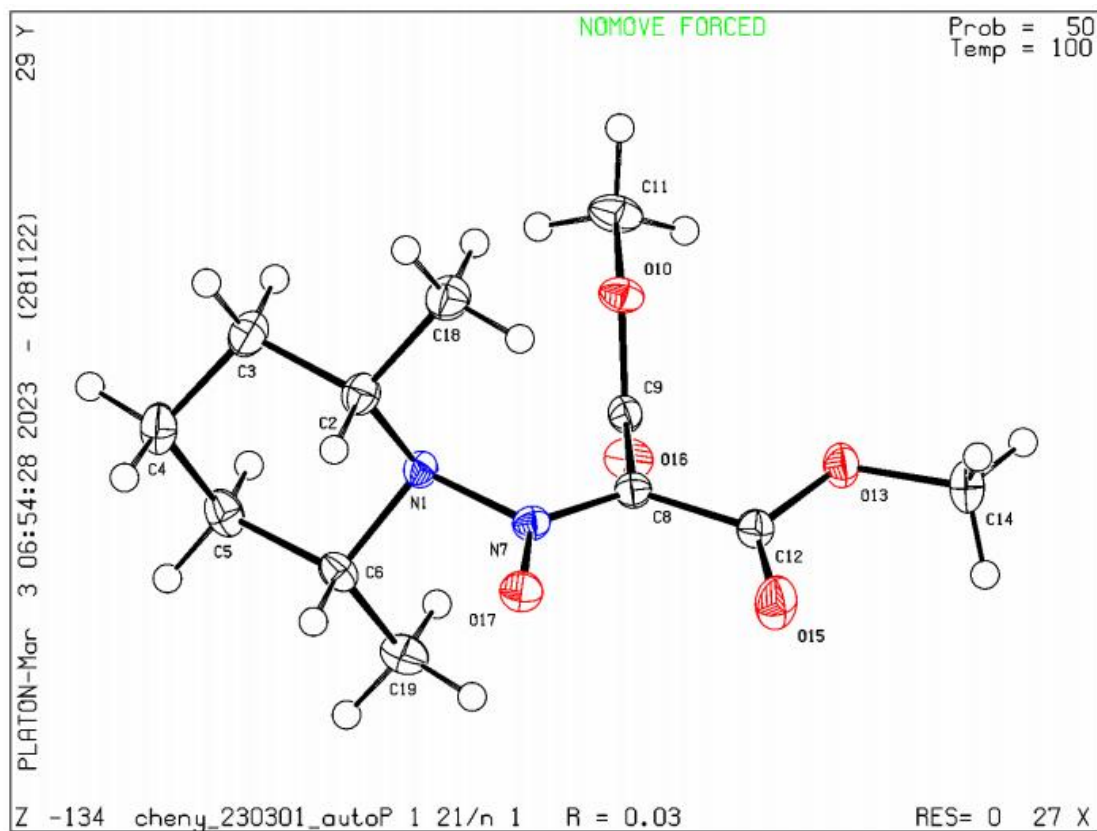

## 10. References

- [1] (a) D. V. Patil, Y. Lee, H. Y. Kim and K. Oh, Visible-Light-Promoted Photoaddition of N-Nitrosopiperidines to Alkynes: Continuous Flow Chemistry Approach to Tetrahydroimidazo [1,2-*a*]pyridine 1-Oxides, *Org. Lett.*, 2022, **24**, 5840-5844; (b) T. Ohwada, M. Miura, H. Tanaka, S. Sakamoto, K. Yamaguchi, H. Ikeda and S. Inagaki, Structural Features of Aliphatic N-Nitrosamines of 7-Azabicyclo[2.2.1]heptanes That Facilitate N-NO Bond Cleavage, *J. Am. Chem. Soc.*, 2001, **123**, 10164-10172; (c) M. M. Maguta, Y. Stenström and C. J. Nielsen, Kinetic and Theoretical Study of the Nitrate (NO<sub>3</sub>) Radical Gas Phase Reactions with N-Nitrosodimethylamine and N-Nitrosodiethylamine, *J. Phys. Chem. A*, 2016, **120**, 6970-6977; (d) B. B. Touré and D. G. Hall, Three-Component Aza[4+2]/Allylboration/Retro-sulfinyl-ene Sequential Reaction: a New Stereocontrolled Entry to Palustrine Alkaloids and other 2,6-Disubstituted Piperidines, *Angew. Chem.*, 2004, **116**, 2035-2038.
- [2] (a) G. W. Xu, Y. Q. Yang, Y. M. Yang, G. Song, S. S. Li, J. J. Zhang, W. M. Yang, L. L. Wang, Z. Y. Weng and Z. L. Zuo, The Discovery, Design and Synthesis of Potent Agonists of Adenylyl Cyclase Type 2 by Virtual Screening Combining Biological Evaluation, *Eur J Med Chem*, 2020, **191**, 112-115; (b) J. Li, H. Li, D. Q. Fang, L. J. Liu, X. Han, J. N. Sun, C. P. Li, Y. Zhou, D. J. Ye and H. Liu, Sulfoximines Assisted Rh(III)-Catalyzed C-H Activation/Annulation Cascade to Synthesize Highly Fused Indeno-1,2-benzothiazines, *J. Org. Chem.*, 2021, **86**, 15217-15227.
- [3] (a) P. Zhang, J. Zeng, P. Pan, X. J. Zhang and M. Yan, Palladium-Catalyzed Migratory Insertion of Carbenes and C-C Cleavage of Cycloalkanecarboxamides, *Org. Lett.*, 2022, **24**, 536-541; (b) M. Presset, D. Mailhol, Y. Coquerel and J. Rodriguez, Diazo-Transfer Reactions to 1,3-Dicarbonyl Compounds with Tosyl Azide, *Synthesis.*, 2011, **16**, 2549-2552.
- [4] P. B. Wakchaure, S. Easwar, V. G. Puranik and N. P. Argade, Facile air-oxidation of N-homopiperonyl-5,6-dimethoxyhomophthalimide: simple and efficient access to nuevamine, *Tetrahedron.*, 2008, **64**, 1786-1791.
- [5] S. Maniam, S. Sandanayake, E. I. Izgorodina and S. J. Langford, Unusual Products from Oxidation of Naphthalene Diimides, *Asian J. Org. Chem.*, 2016, **5**, 490-493.

## 11. NMR spectra of products

### $^1\text{H}$ NMR (400 MHz) Spectrum of 3a in $\text{CDCl}_3$

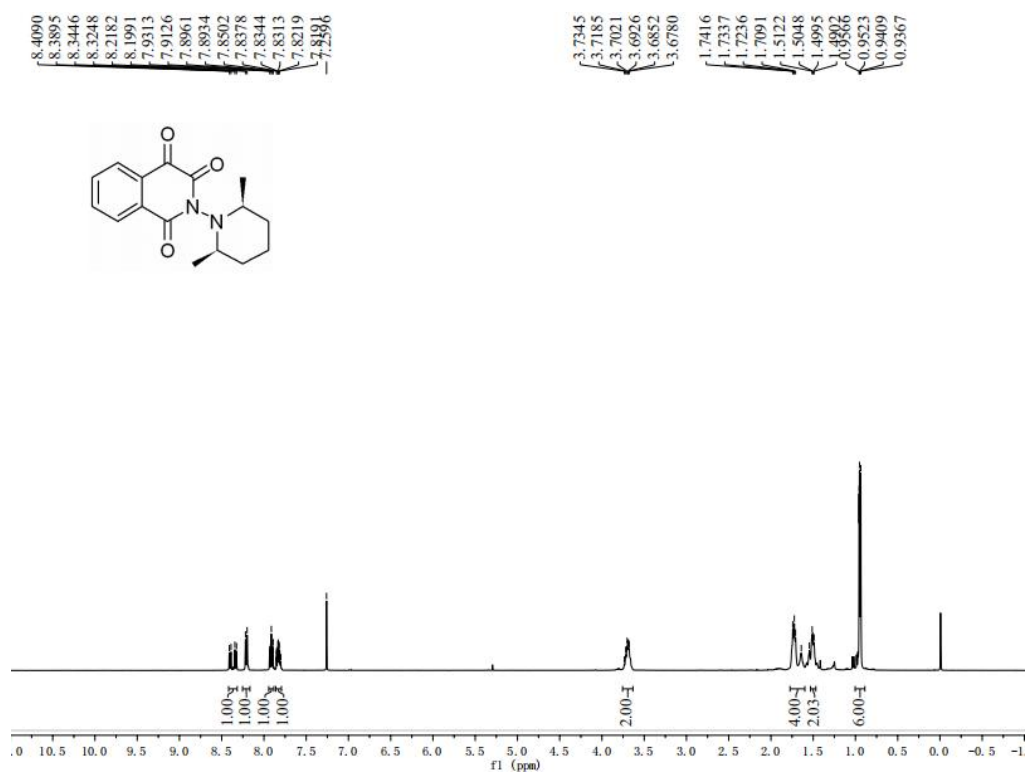

### $^{13}\text{C}$ NMR (101 MHz) Spectrum of 3a in $\text{CDCl}_3$

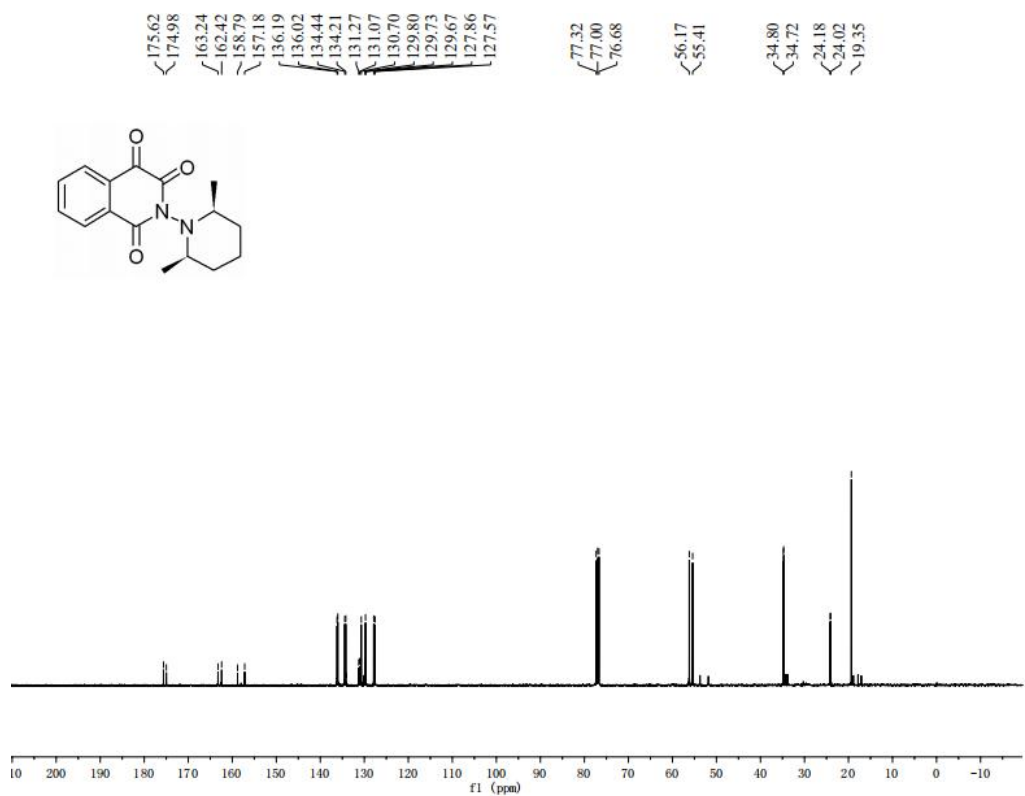

**<sup>1</sup>H NMR (500 MHz) Spectrum of 3b in CDCl<sub>3</sub>**

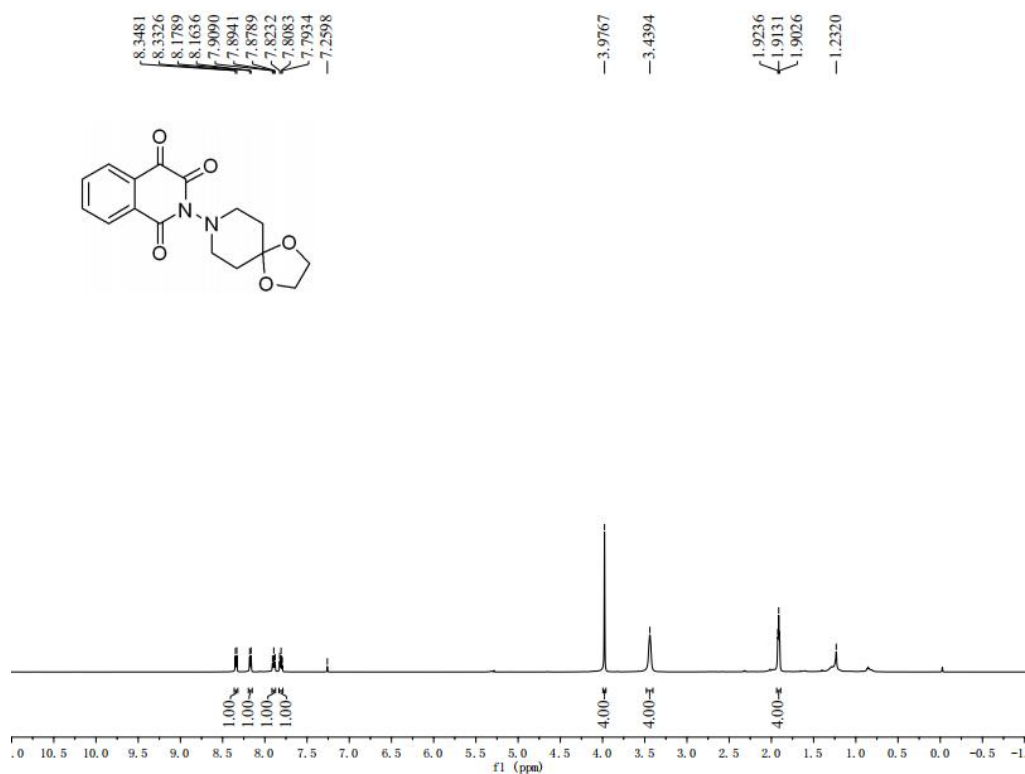

**<sup>13</sup>C NMR (126 MHz) Spectrum of 3b in CDCl<sub>3</sub>**

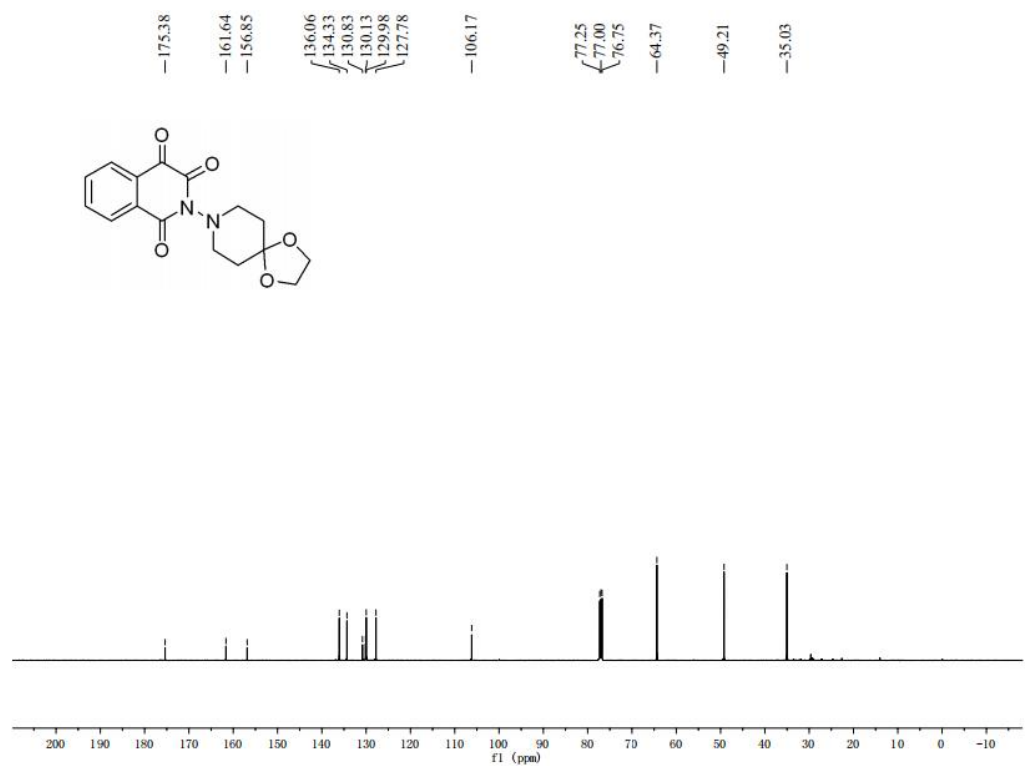

**<sup>1</sup>H NMR (400 MHz) Spectrum of 3c in CDCl<sub>3</sub>**

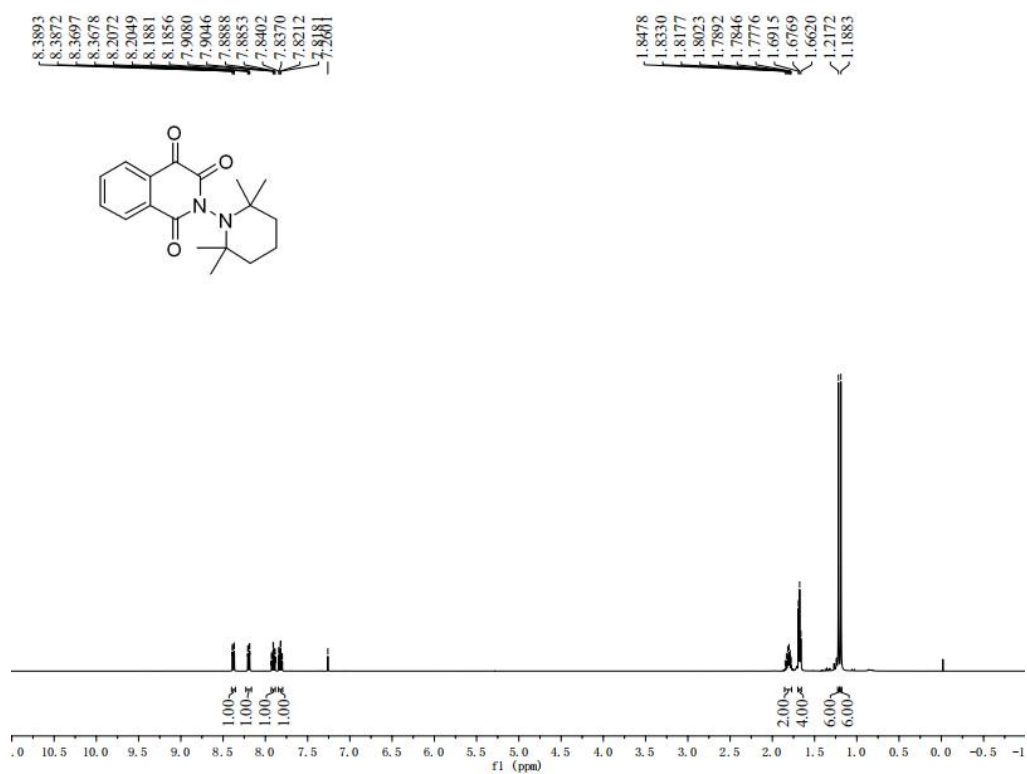

**<sup>13</sup>C NMR (101 MHz) Spectrum of 3c in CDCl<sub>3</sub>**

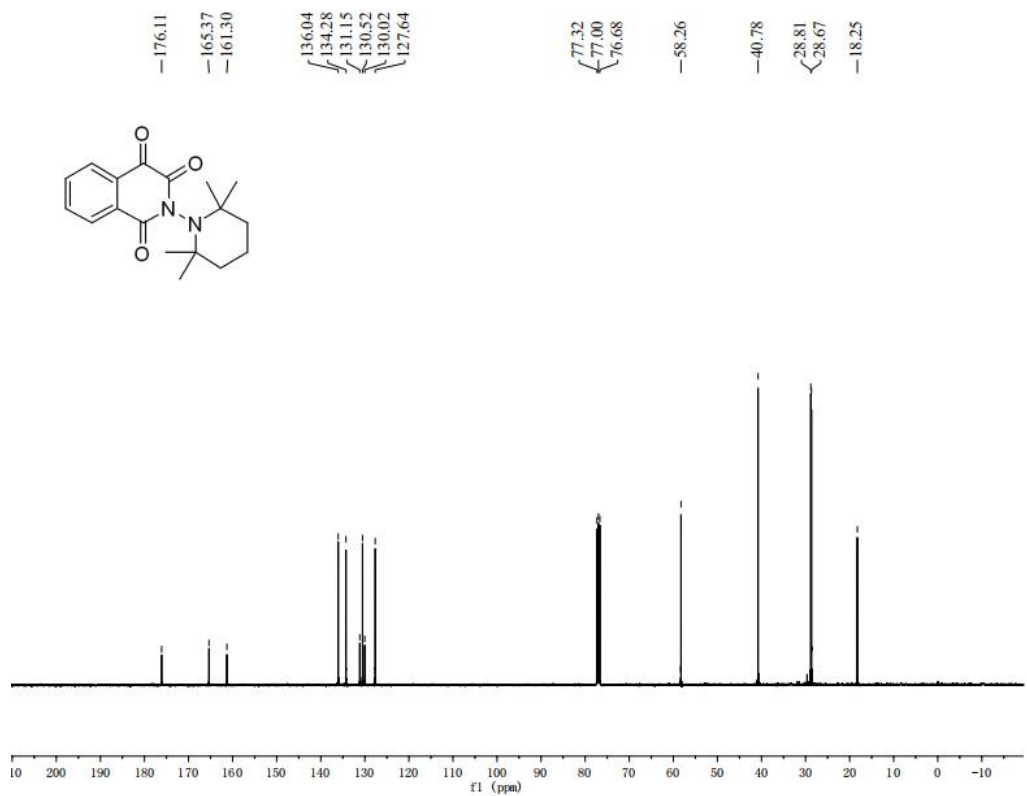

**<sup>1</sup>H NMR (500 MHz) Spectrum of 3e in CDCl<sub>3</sub>**

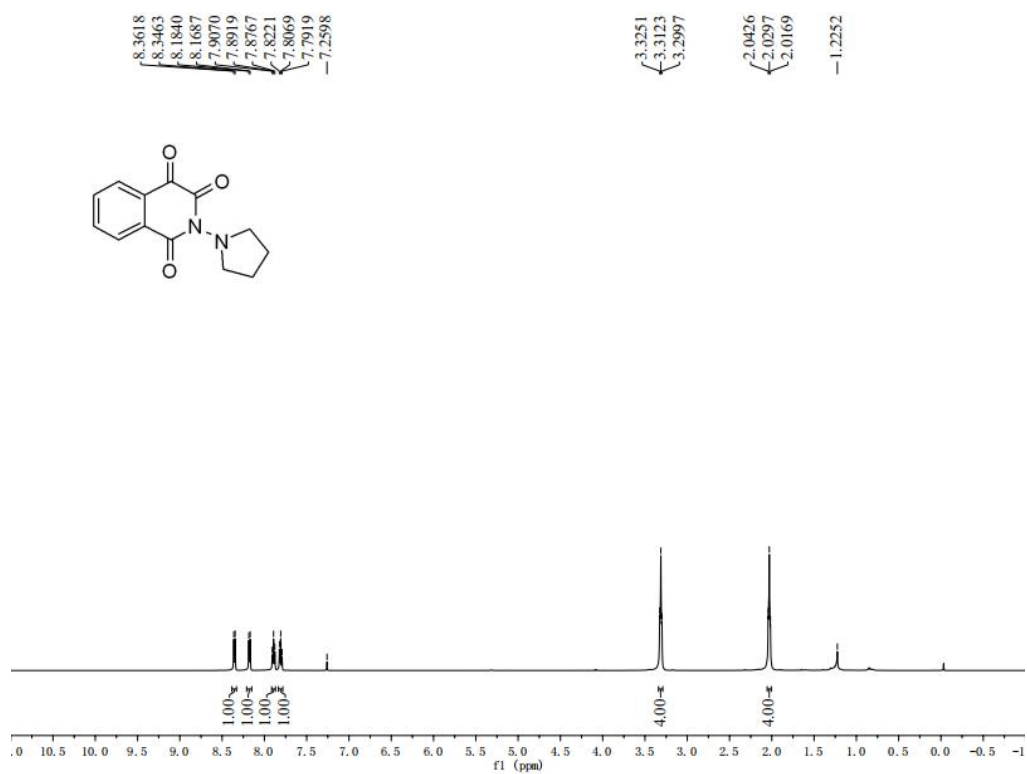

**<sup>13</sup>C NMR (126 MHz) Spectrum of 3e in CDCl<sub>3</sub>**

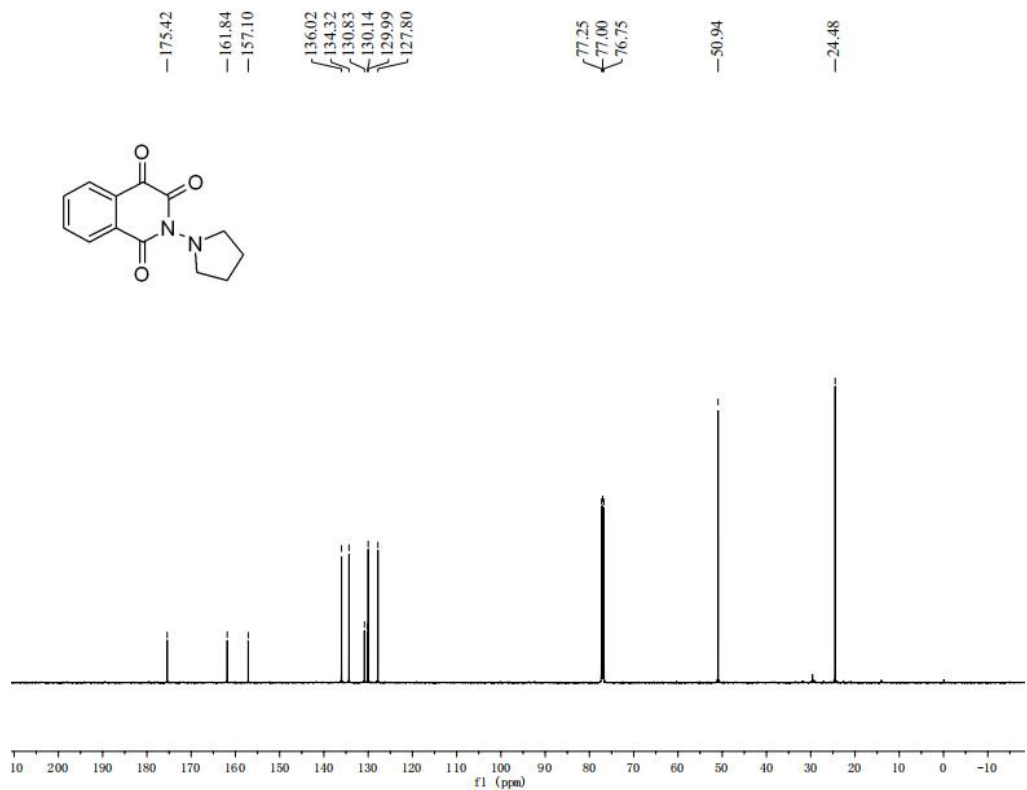

**<sup>1</sup>H NMR (500 MHz) Spectrum of 3f in CDCl<sub>3</sub>**

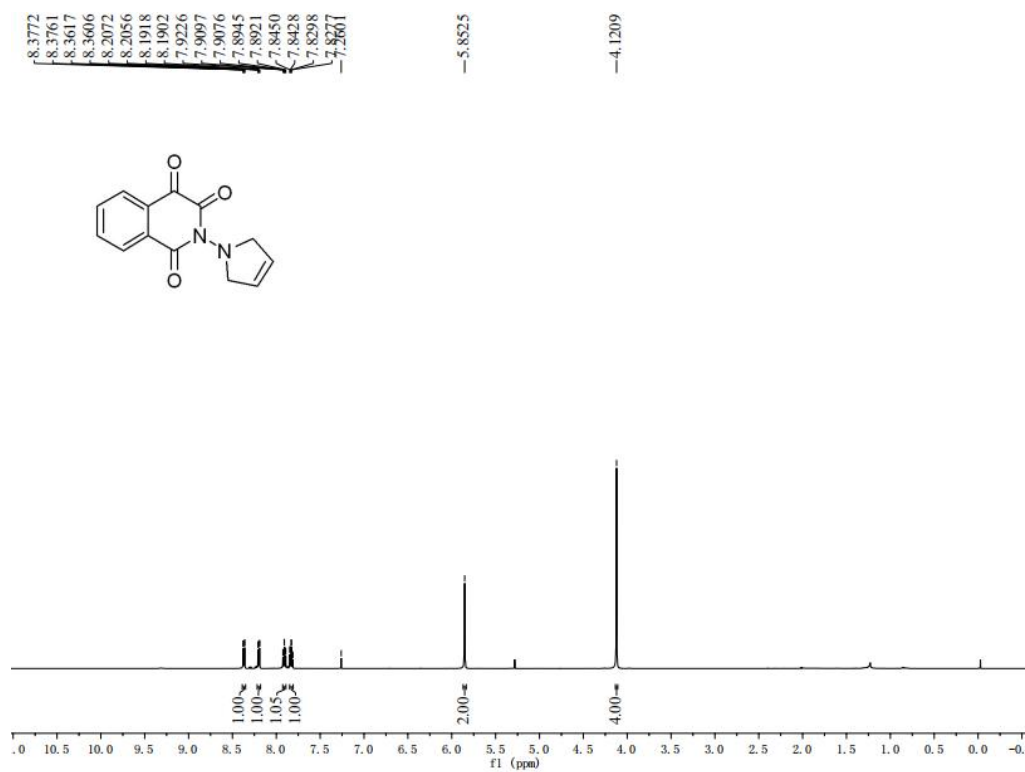

**<sup>13</sup>C NMR (126 MHz) Spectrum of 3f in CDCl<sub>3</sub>**

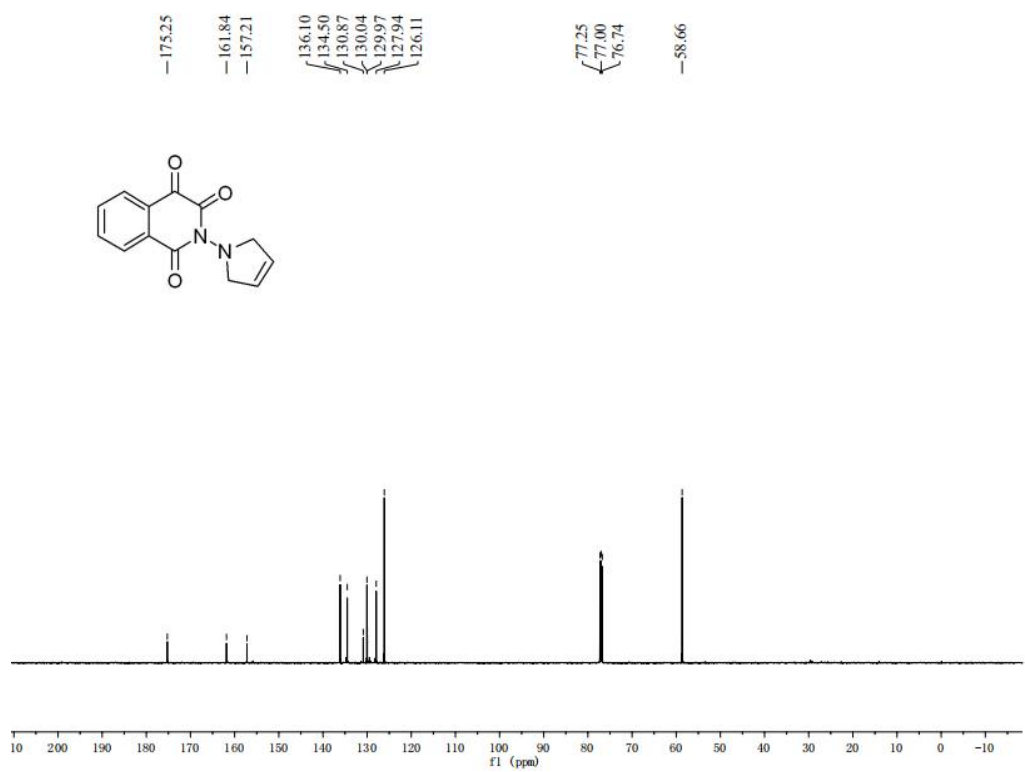

**<sup>1</sup>H NMR (400 MHz) Spectrum of 3g in CDCl<sub>3</sub>**

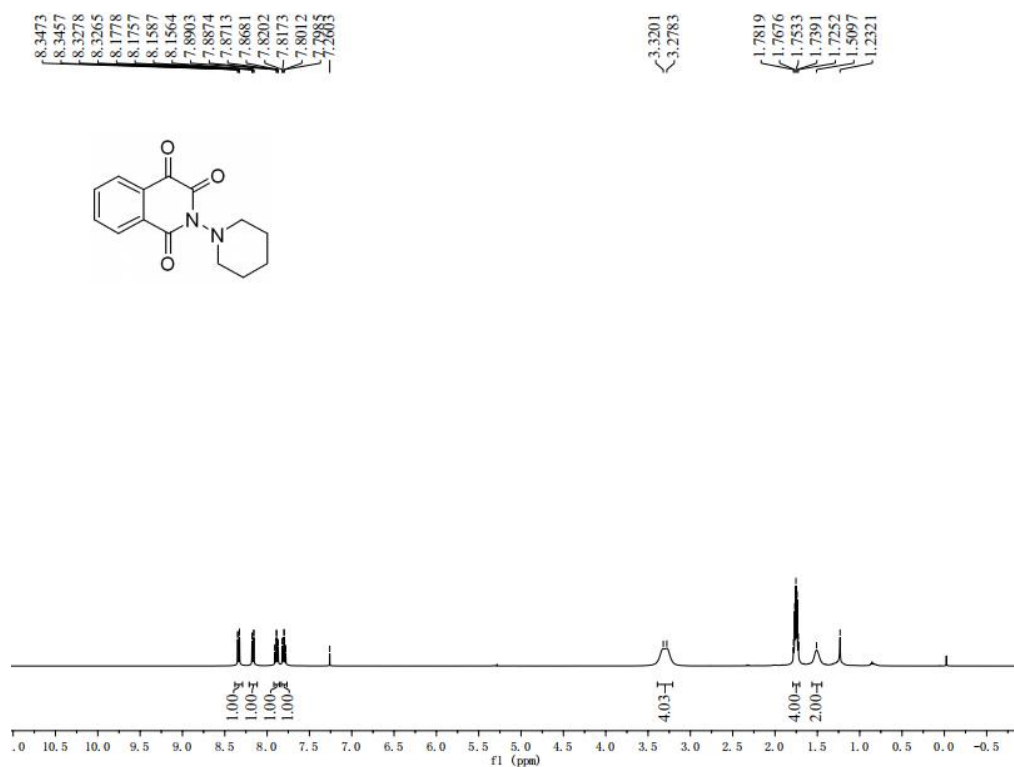

**<sup>13</sup>C NMR (101 MHz) Spectrum of 3g in CDCl<sub>3</sub>**

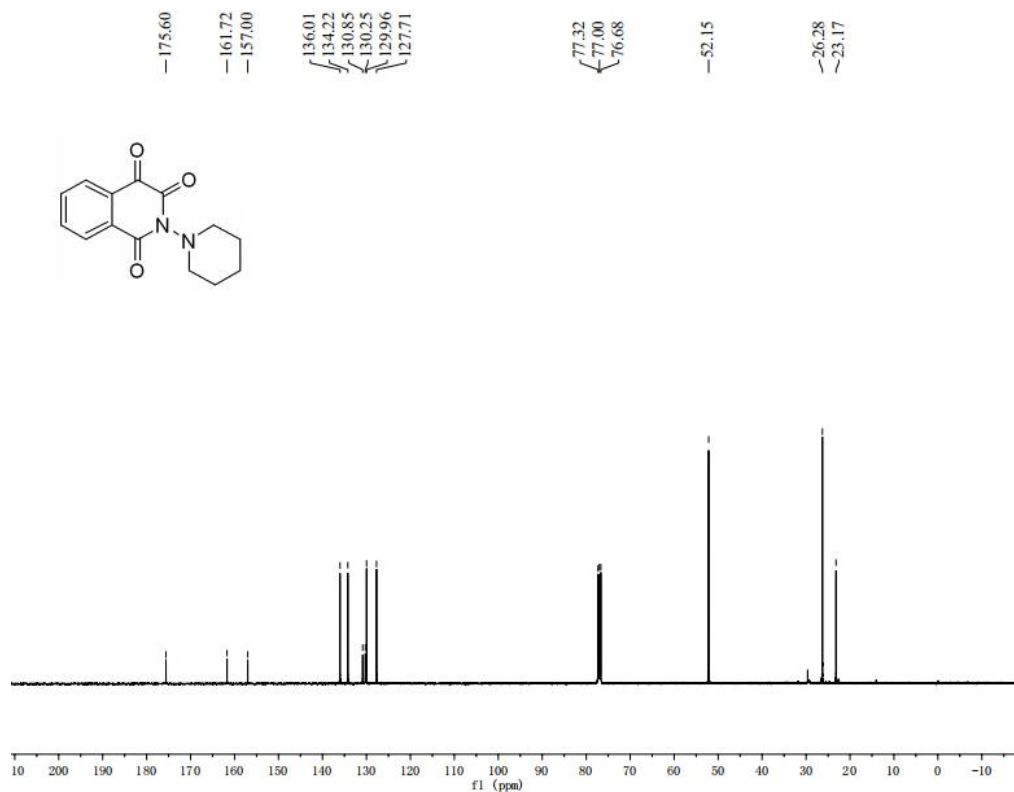

**<sup>1</sup>H NMR (500 MHz) Spectrum of 3h in CDCl<sub>3</sub>**

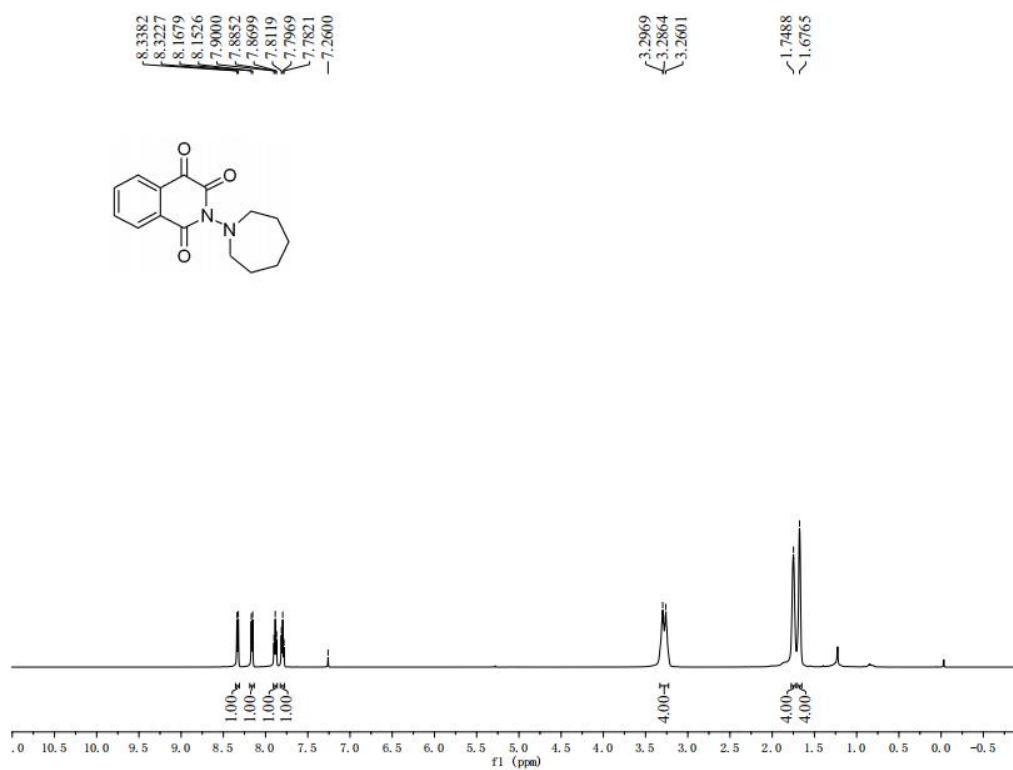

**<sup>13</sup>C NMR (126 MHz) Spectrum of 3h in CDCl<sub>3</sub>**

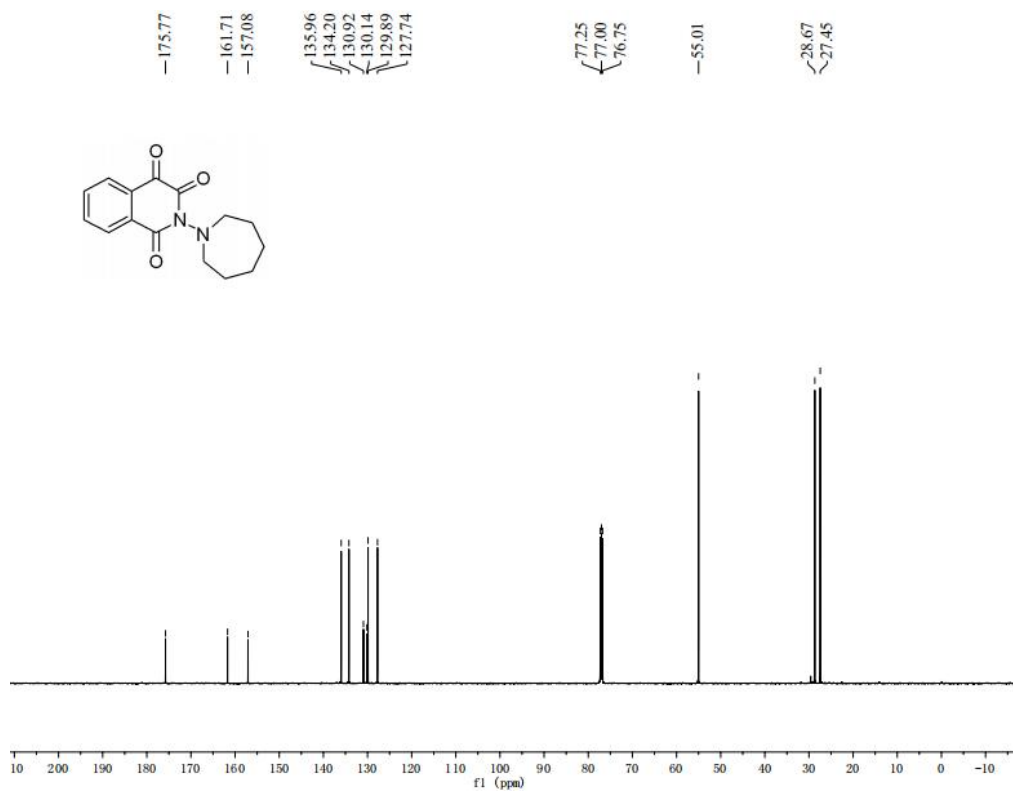

**<sup>1</sup>H NMR (500 MHz) Spectrum of 3i in CDCl<sub>3</sub>**

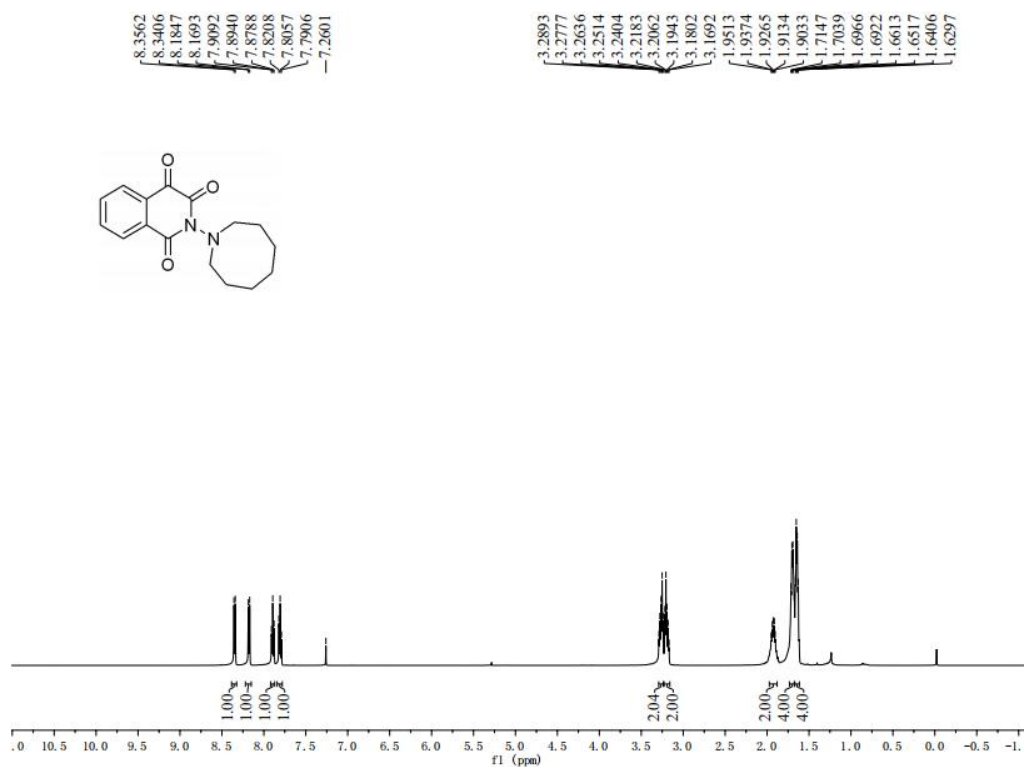

**<sup>13</sup>C NMR (126 MHz) Spectrum of 3i in CDCl<sub>3</sub>**

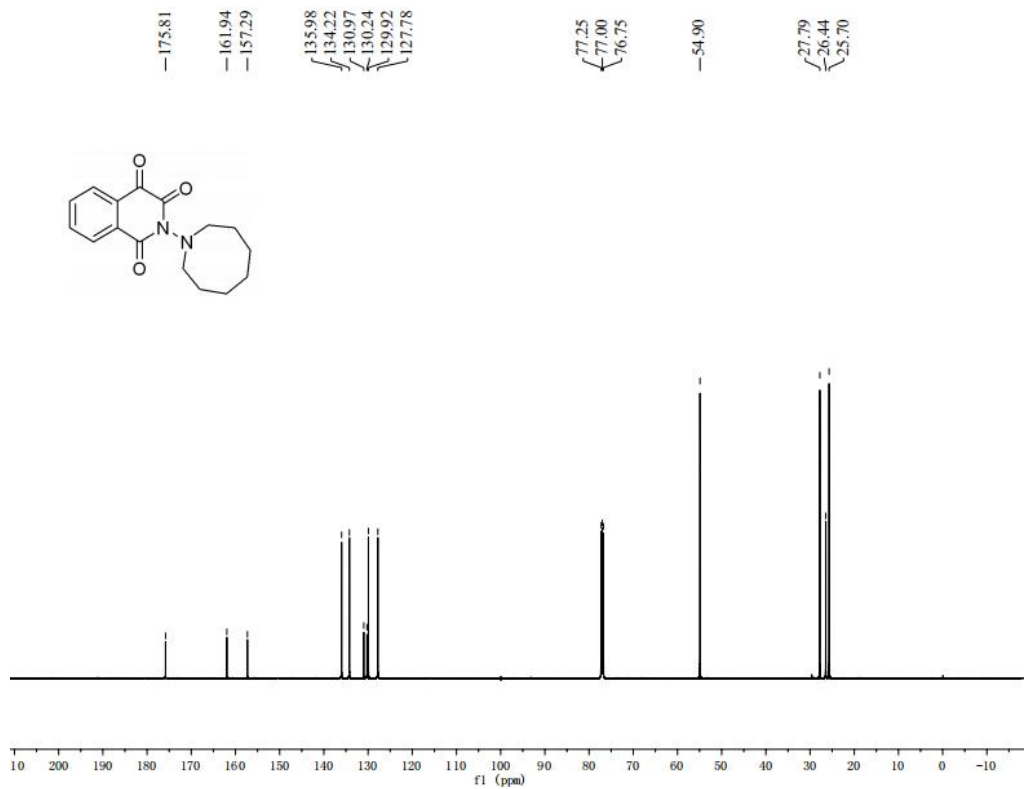

**<sup>1</sup>H NMR (400 MHz) Spectrum of 3j in CDCl<sub>3</sub>**

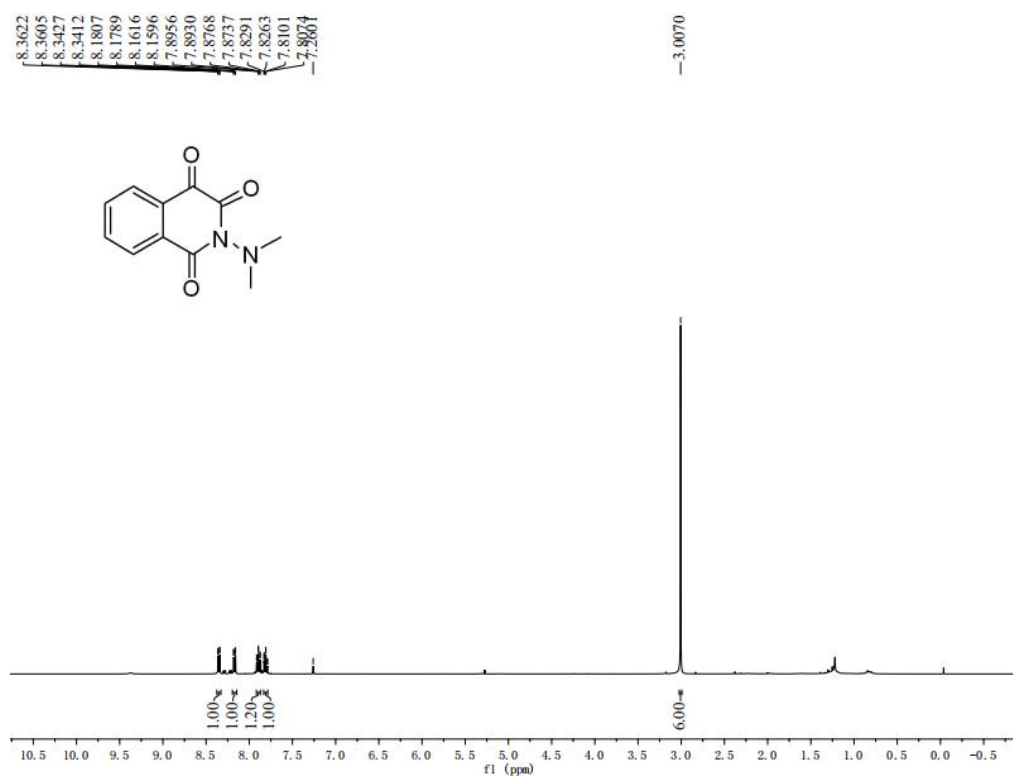

**<sup>13</sup>C NMR (101 MHz) Spectrum of 3j in CDCl<sub>3</sub>**

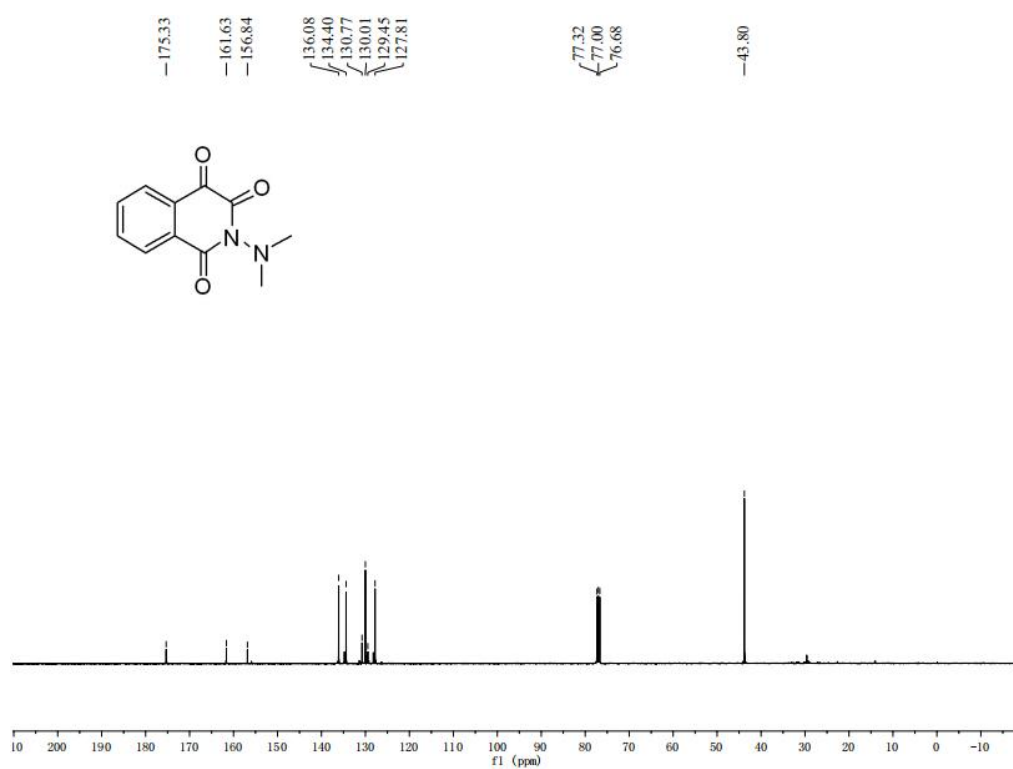

**<sup>1</sup>H NMR (400 MHz) Spectrum of 3k in CDCl<sub>3</sub>**

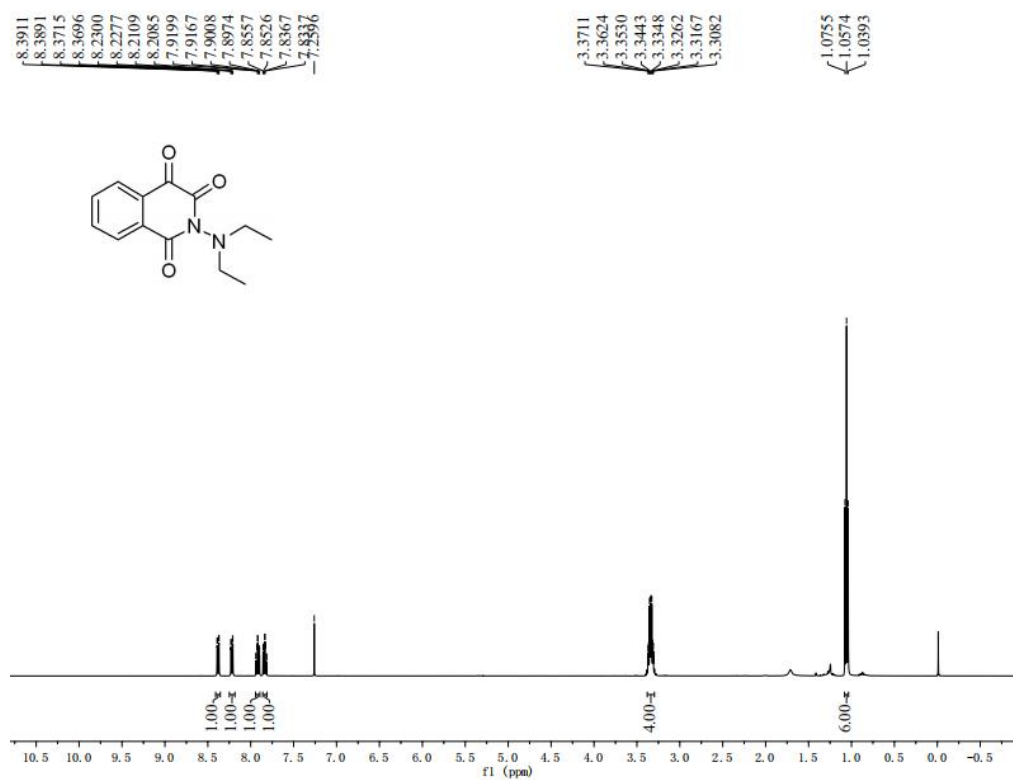

**<sup>13</sup>C NMR (101 MHz) Spectrum of 3k in CDCl<sub>3</sub>**

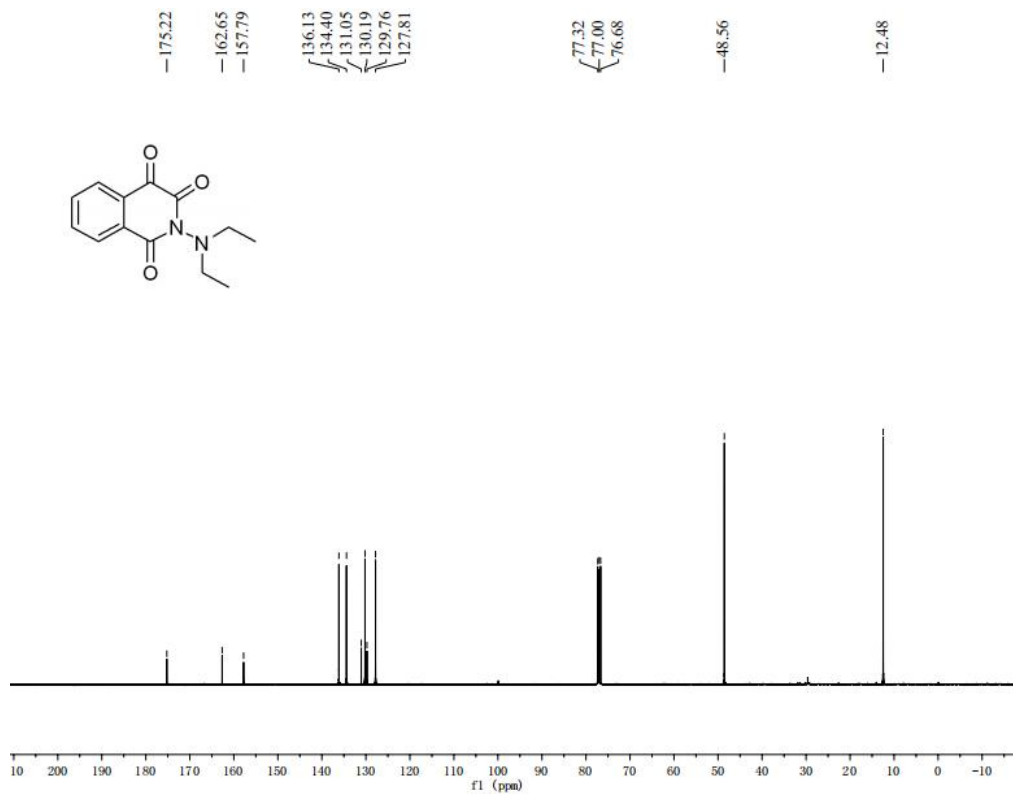

**<sup>1</sup>H NMR (400 MHz) Spectrum of 3l in CDCl<sub>3</sub>**

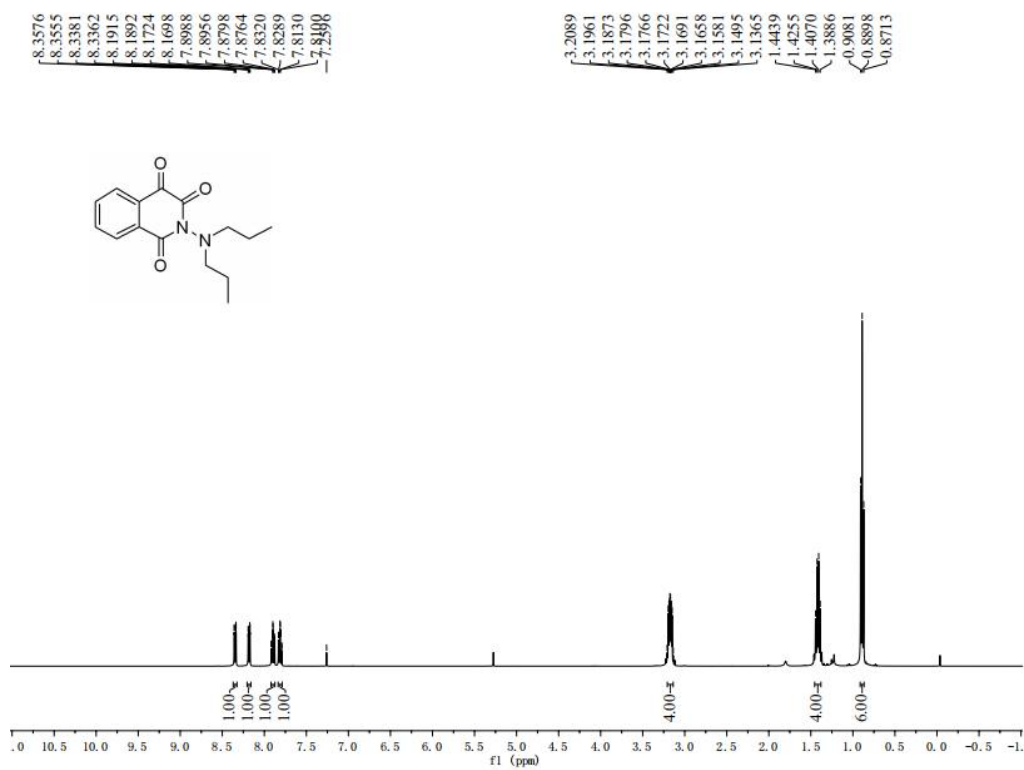

**<sup>13</sup>C NMR (101 MHz) Spectrum of 3l in CDCl<sub>3</sub>**

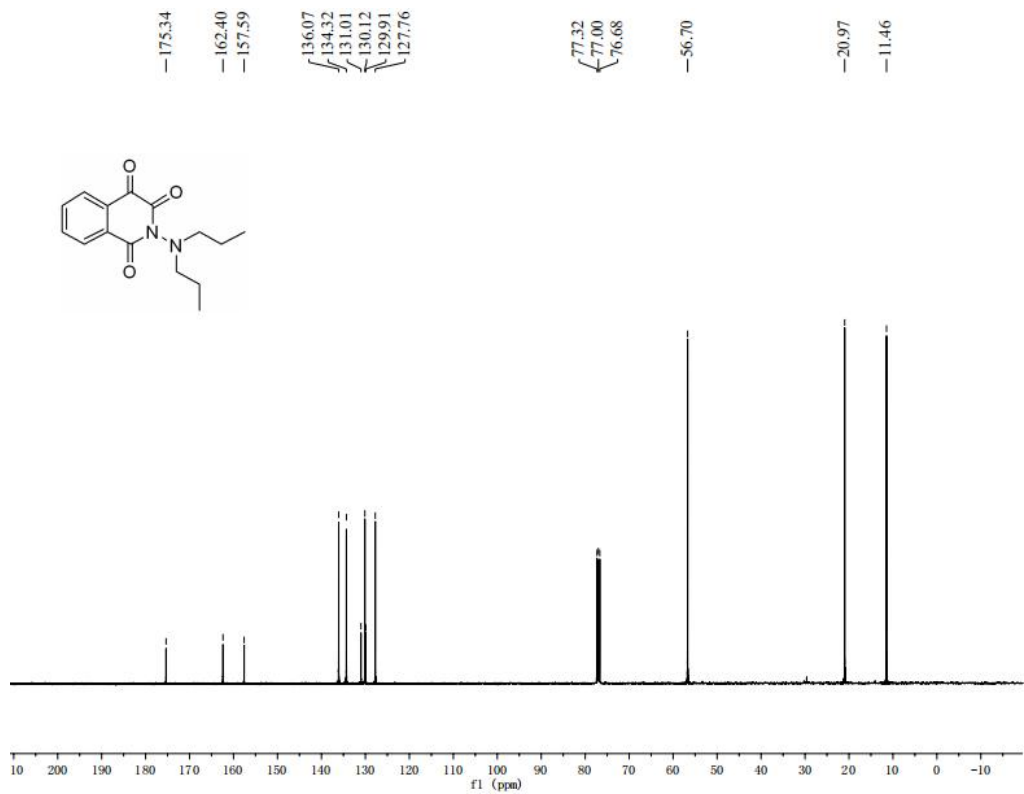

**<sup>1</sup>H NMR (500 MHz) Spectrum of 3m in CDCl<sub>3</sub>**

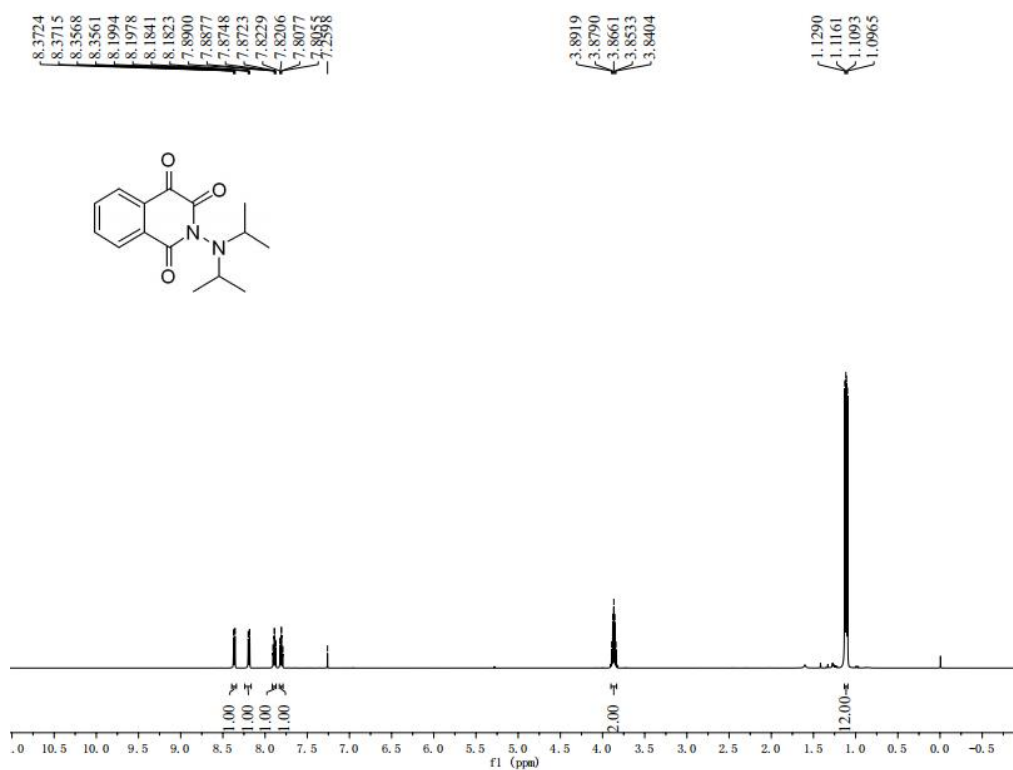

**<sup>13</sup>C NMR (126 MHz) Spectrum of 3m in CDCl<sub>3</sub>**

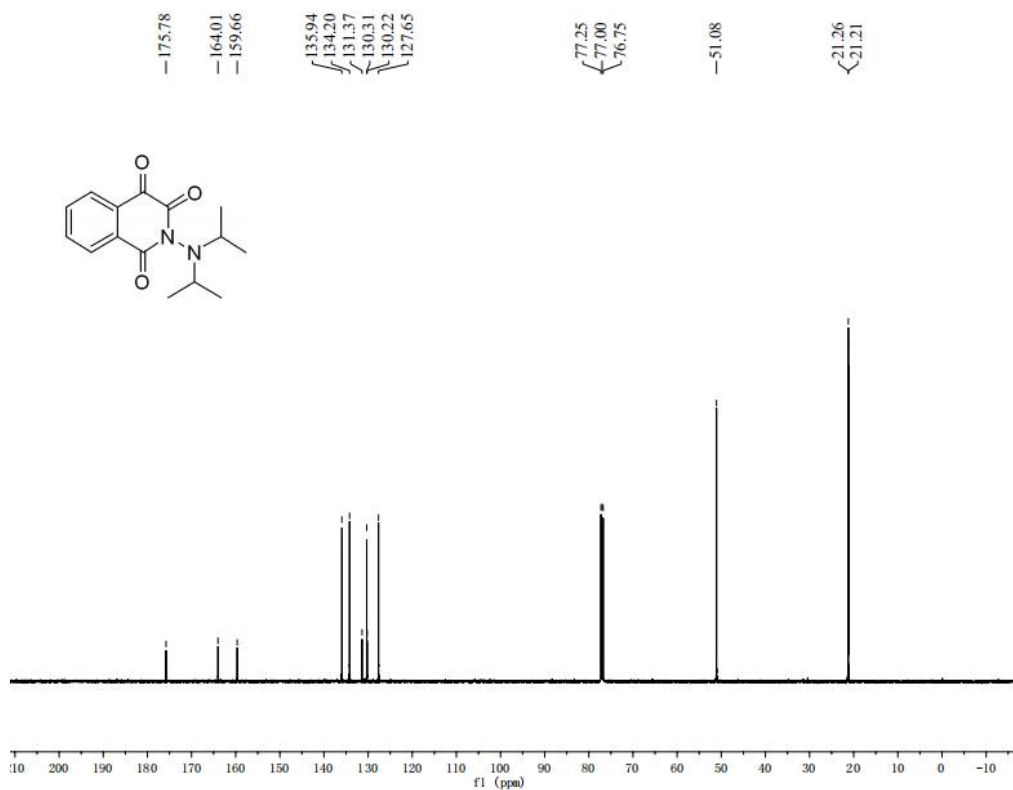

**<sup>1</sup>H NMR (500 MHz) Spectrum of 3n in CDCl<sub>3</sub>**

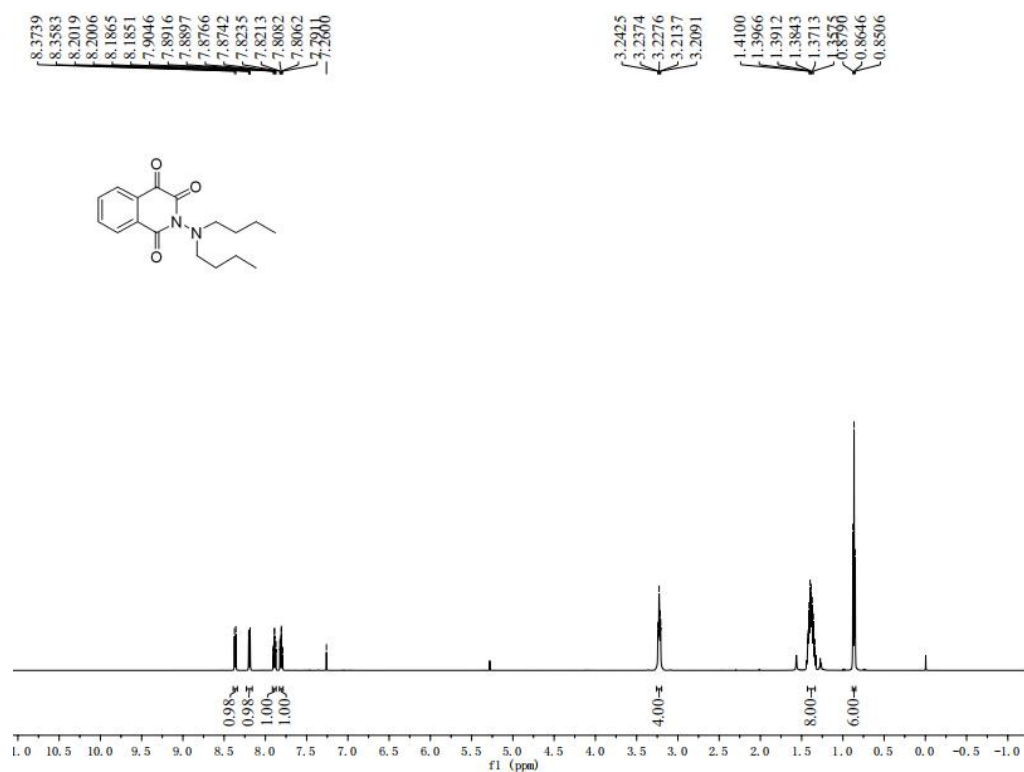

**<sup>13</sup>C NMR (101 MHz) Spectrum of 3n in CDCl<sub>3</sub>**

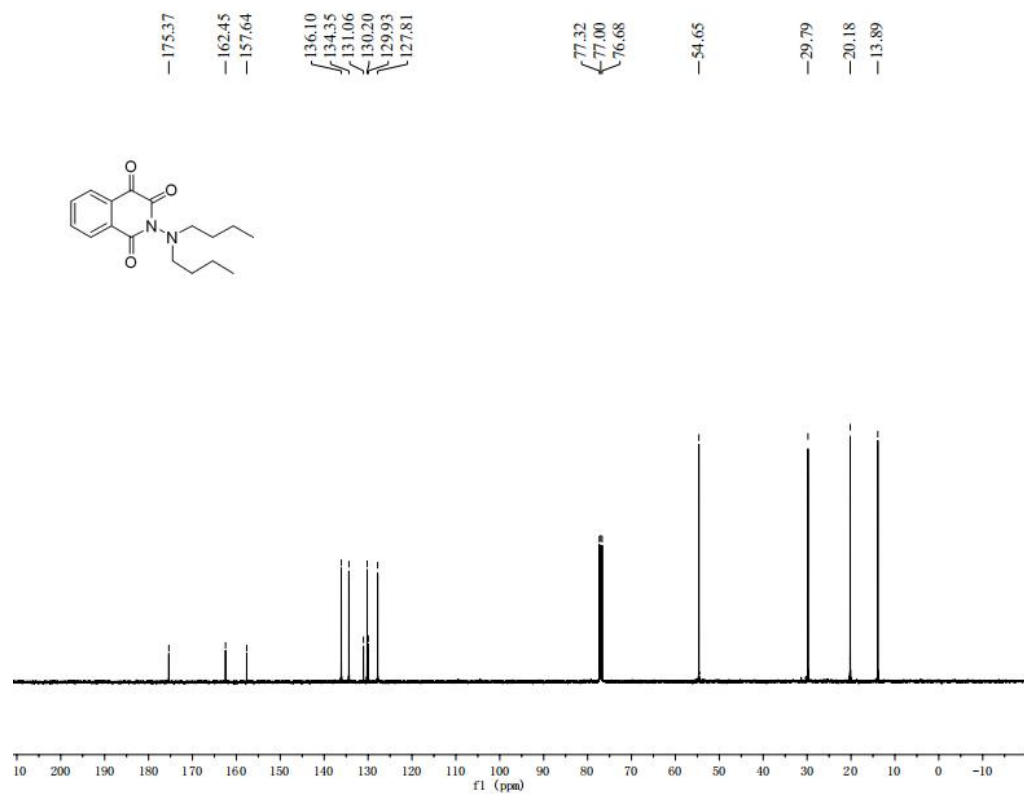

**<sup>1</sup>H NMR (400 MHz) Spectrum of 3o in CDCl<sub>3</sub>**

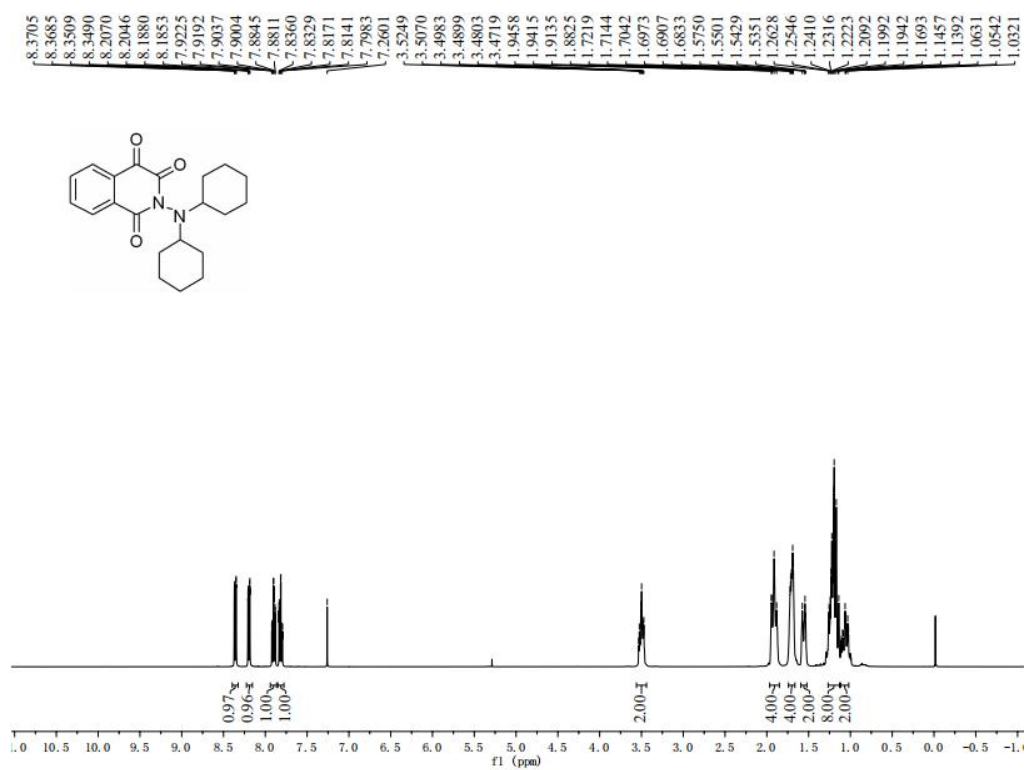

**<sup>13</sup>C NMR (101 MHz) Spectrum of 3o in CDCl<sub>3</sub>**

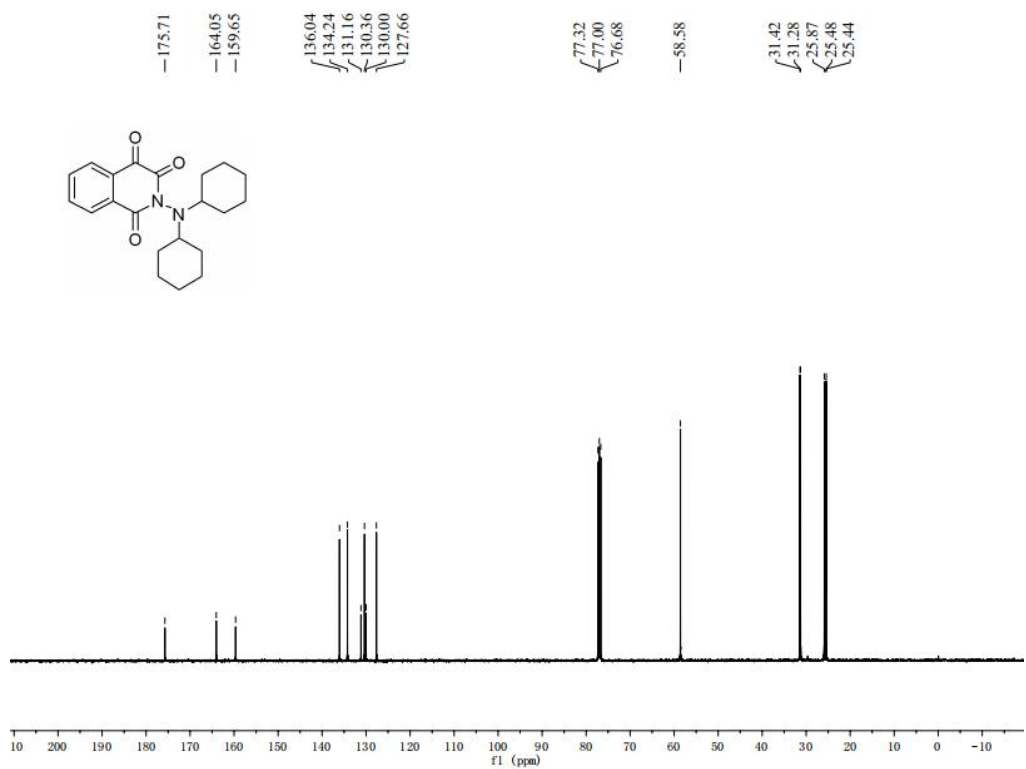

**<sup>1</sup>H NMR (500 MHz) Spectrum of 3p in CDCl<sub>3</sub>**

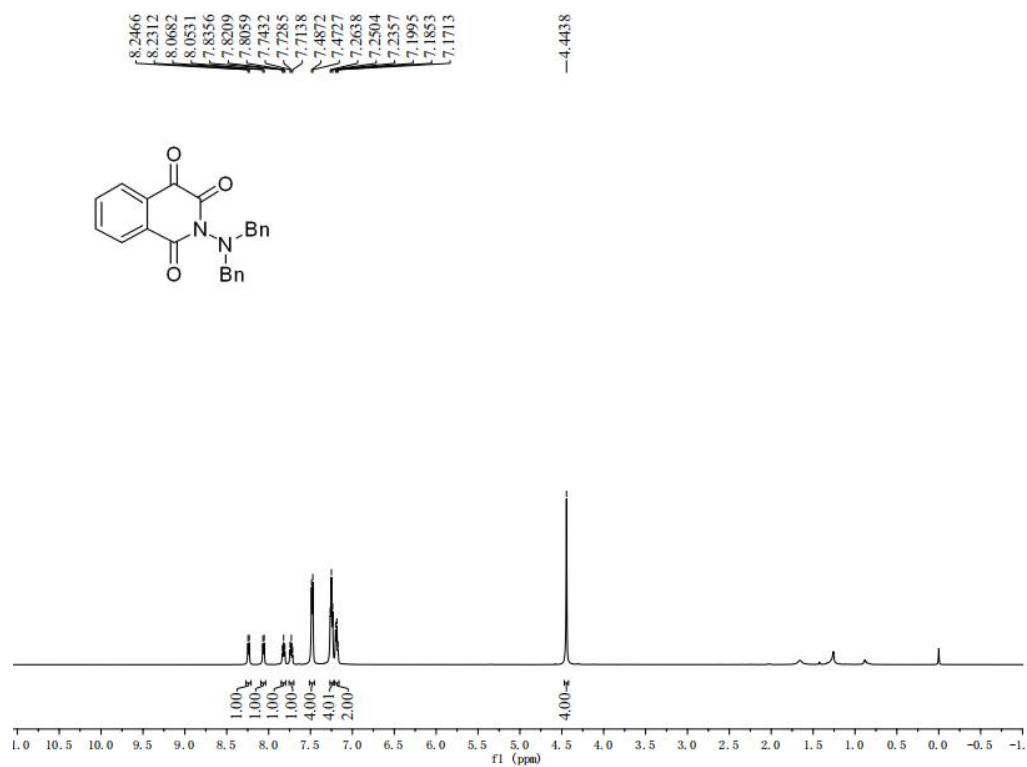

**<sup>13</sup>C NMR (126 MHz) Spectrum of 3p in CDCl<sub>3</sub>**

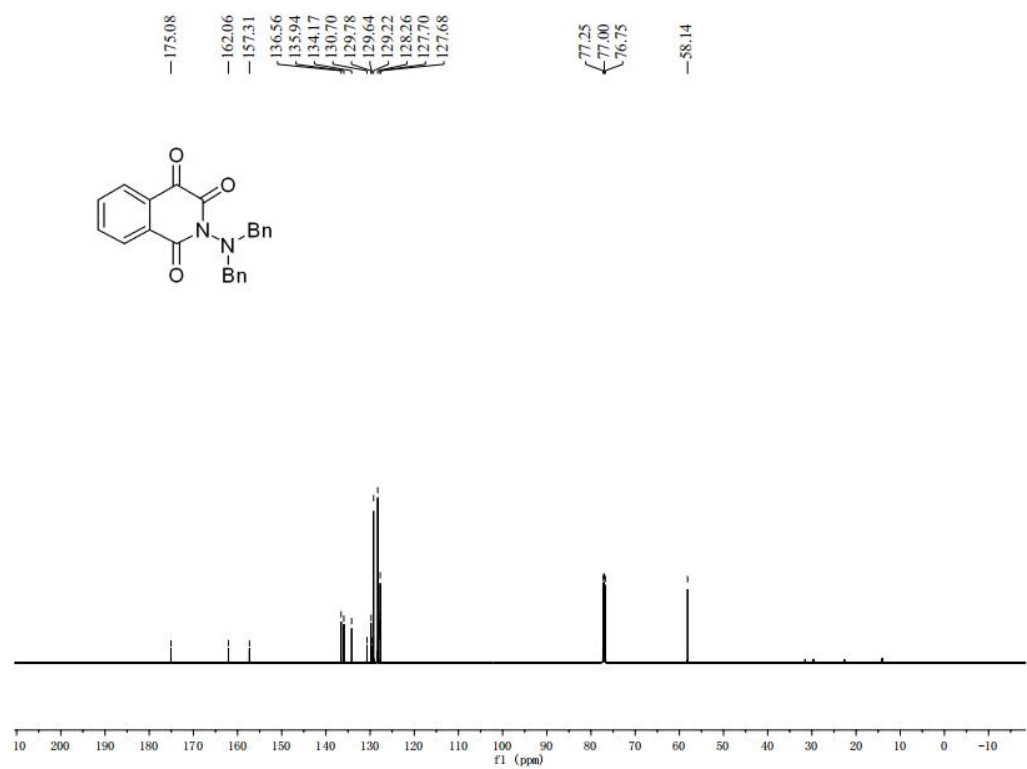

**<sup>1</sup>H NMR (400 MHz) Spectrum of 3q in CDCl<sub>3</sub>**

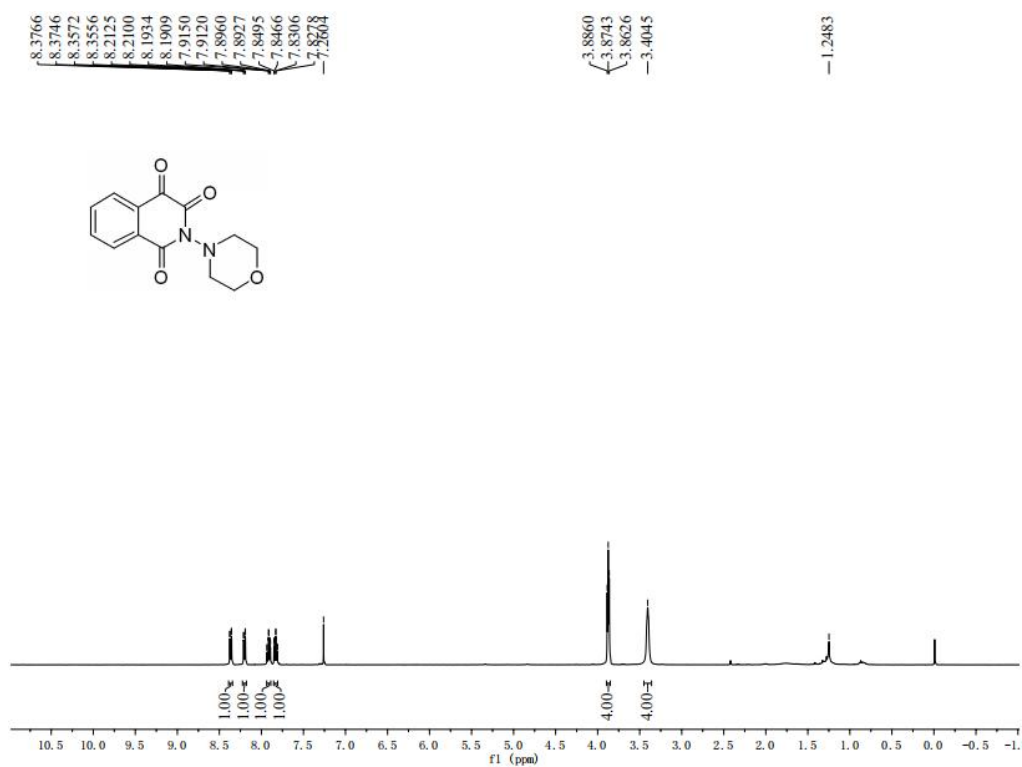

**<sup>13</sup>C NMR (126 MHz) Spectrum of 3q in CDCl<sub>3</sub>**

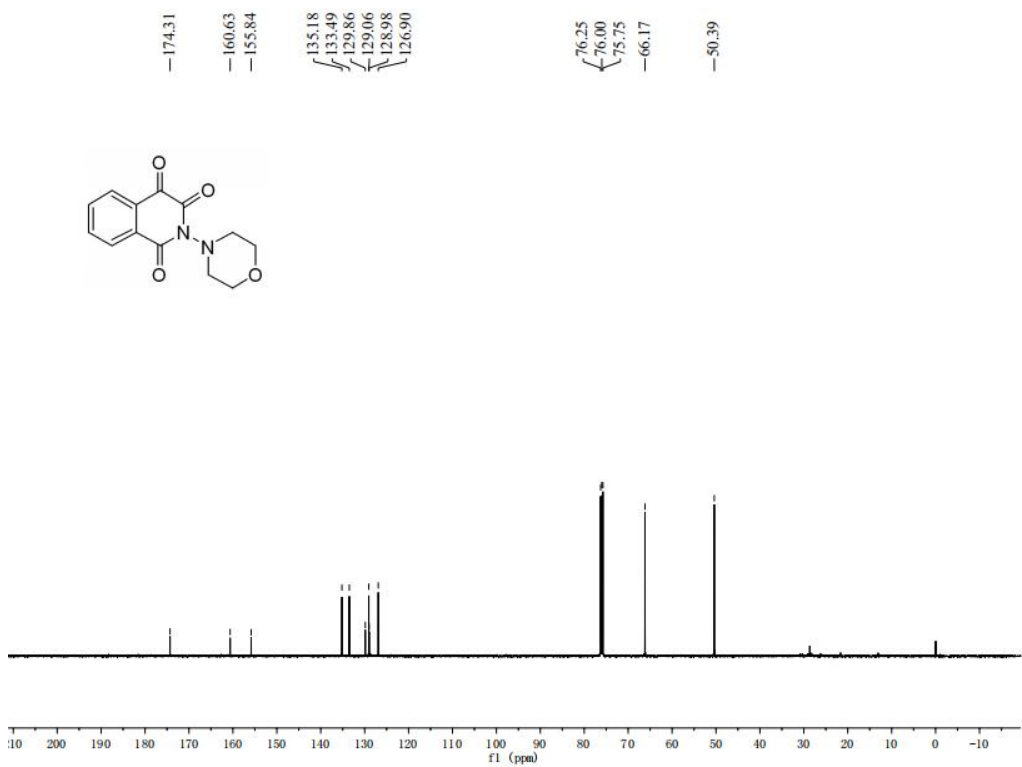

**<sup>1</sup>H NMR (400 MHz) Spectrum of 3r in CDCl<sub>3</sub>**

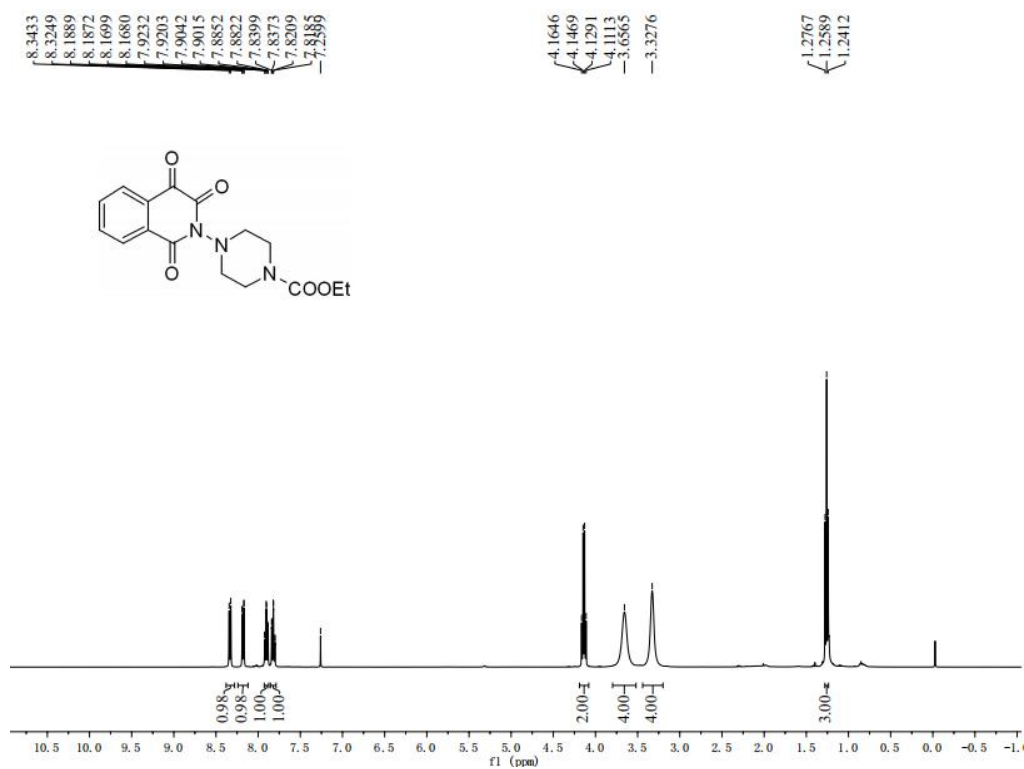

**<sup>13</sup>C NMR (101 MHz) Spectrum of 3r in CDCl<sub>3</sub>**

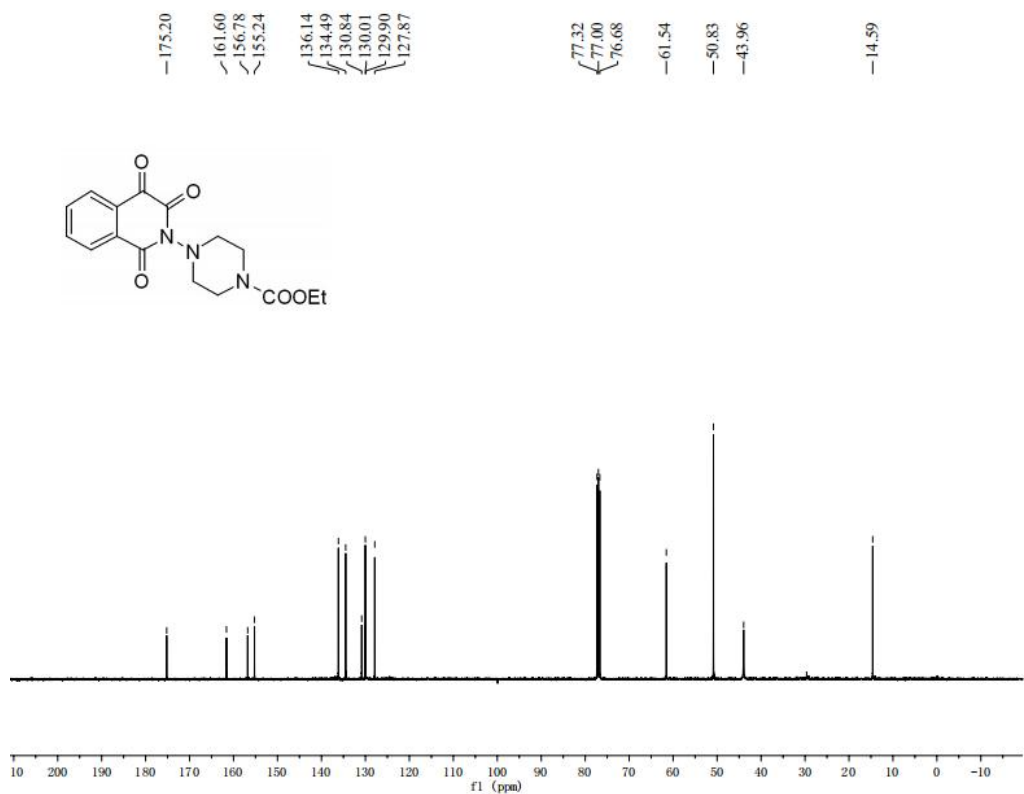

**<sup>1</sup>H NMR (400 MHz) Spectrum of 3s in CDCl<sub>3</sub>**

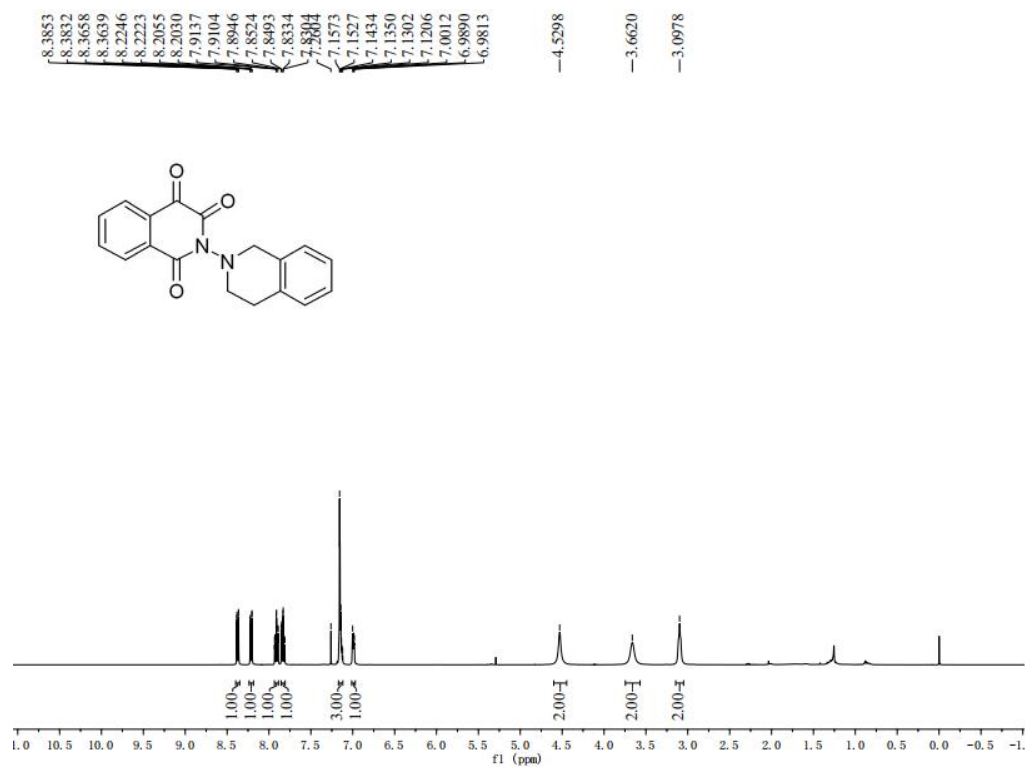

**<sup>13</sup>C NMR (101 MHz) Spectrum of 3s in CDCl<sub>3</sub>**

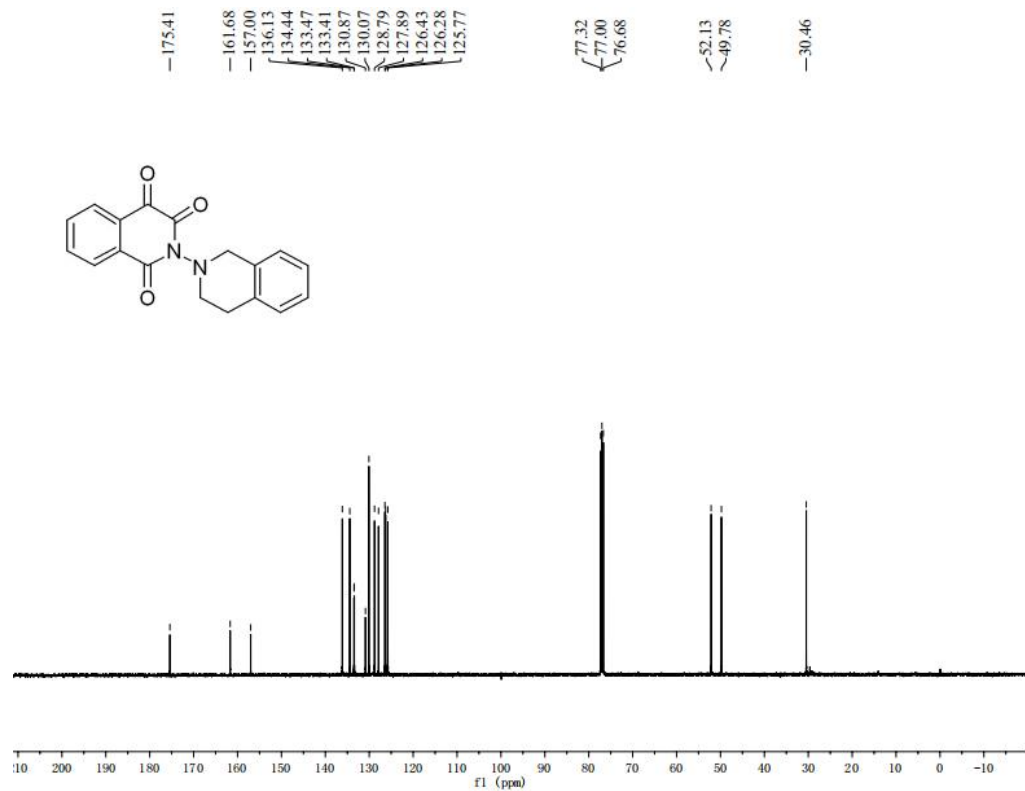

**<sup>1</sup>H NMR (400 MHz) Spectrum of 3t in CDCl<sub>3</sub>**

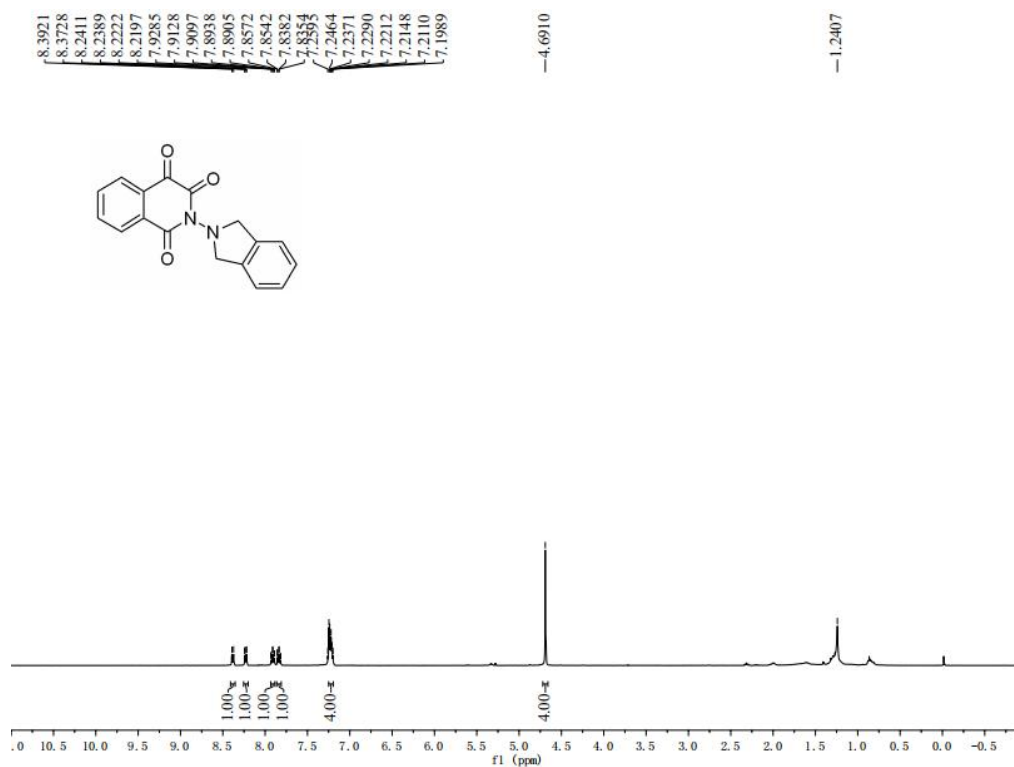

**<sup>13</sup>C NMR (126 MHz) Spectrum of 3t in CDCl<sub>3</sub>**

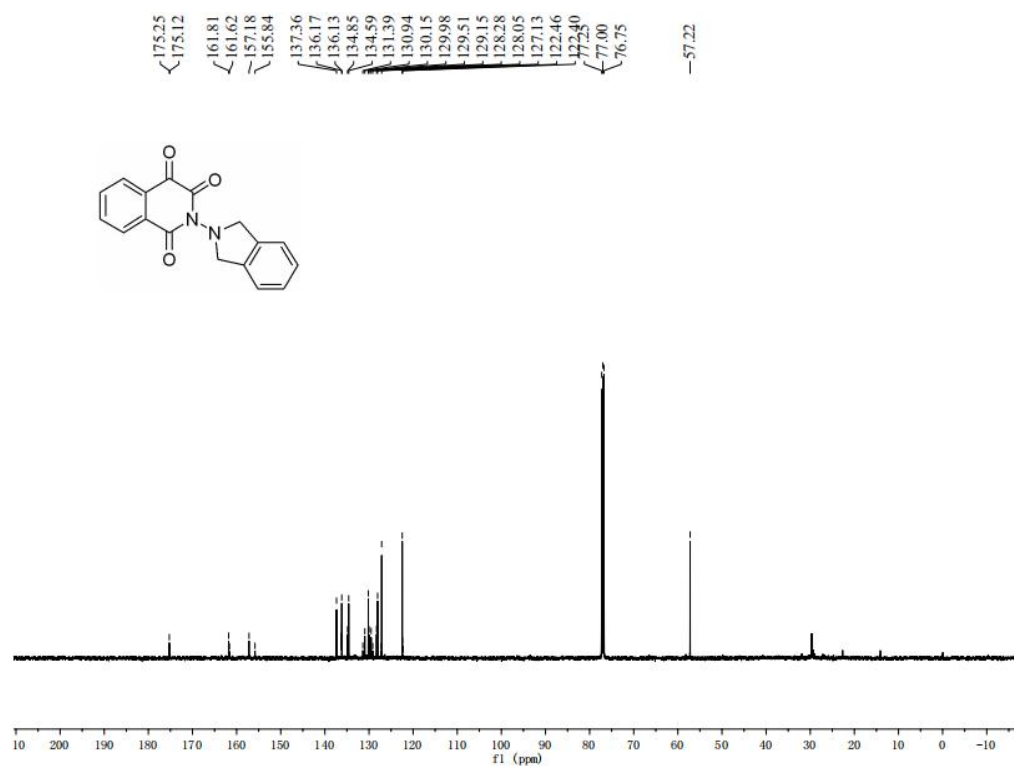

**<sup>1</sup>H NMR (400 MHz) Spectrum of 3x in CDCl<sub>3</sub>**

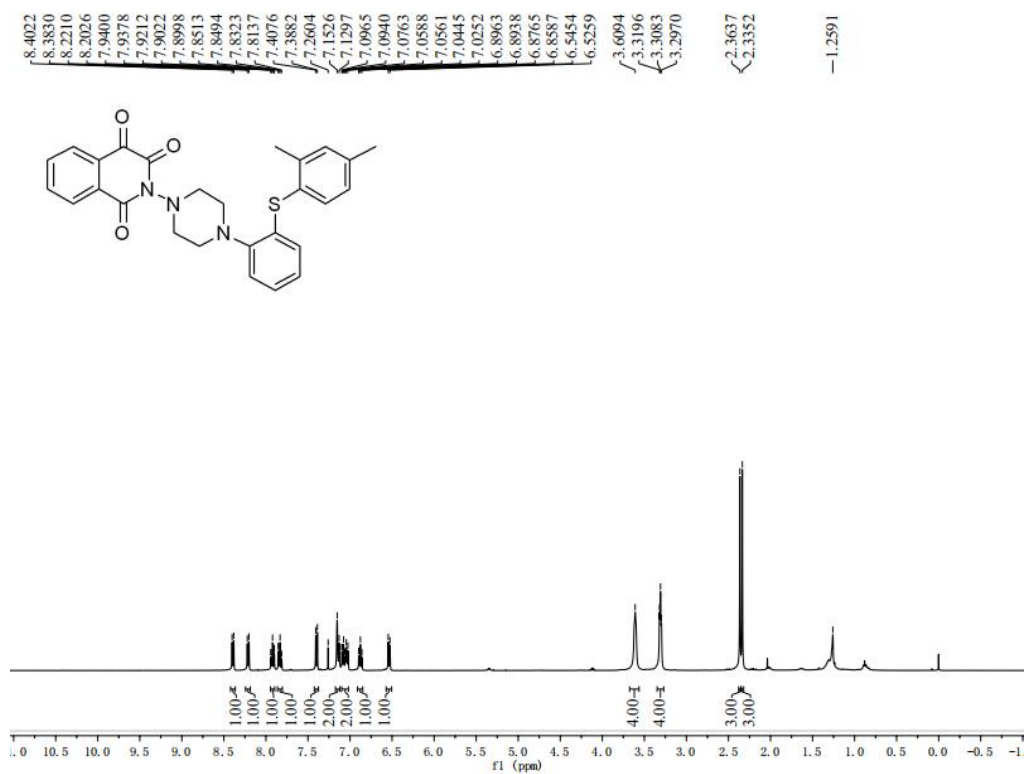

**<sup>13</sup>C NMR (101 MHz) Spectrum of 3x in CDCl<sub>3</sub>**

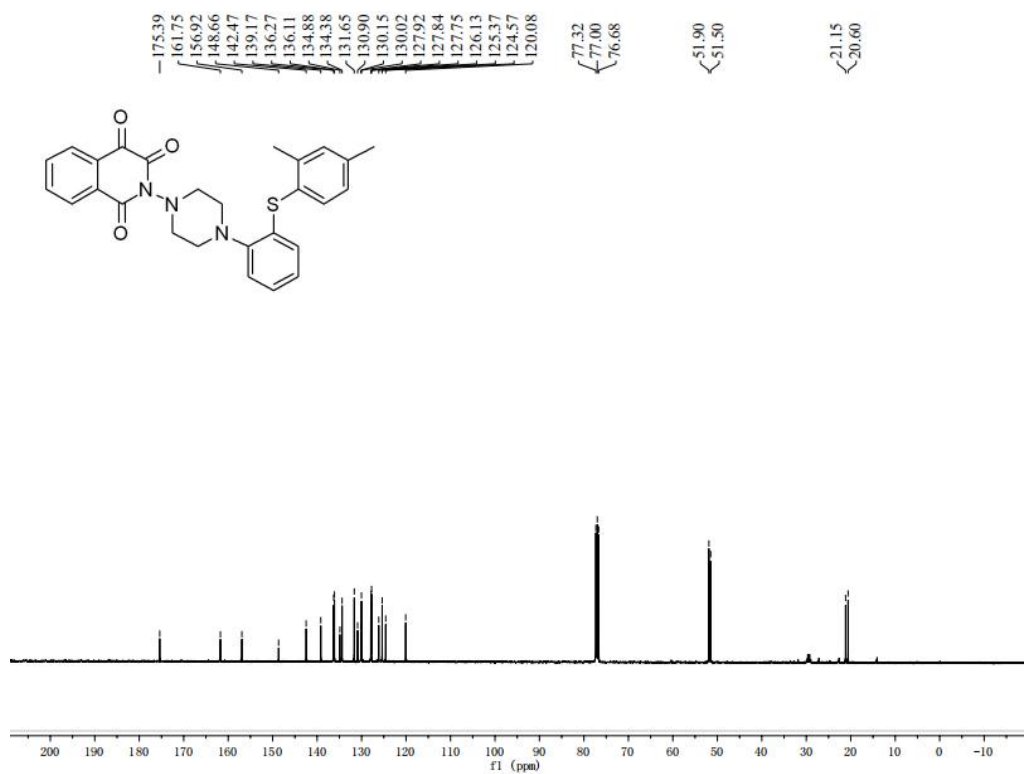

**<sup>1</sup>H NMR (400 MHz) Spectrum of 3y in CDCl<sub>3</sub>**

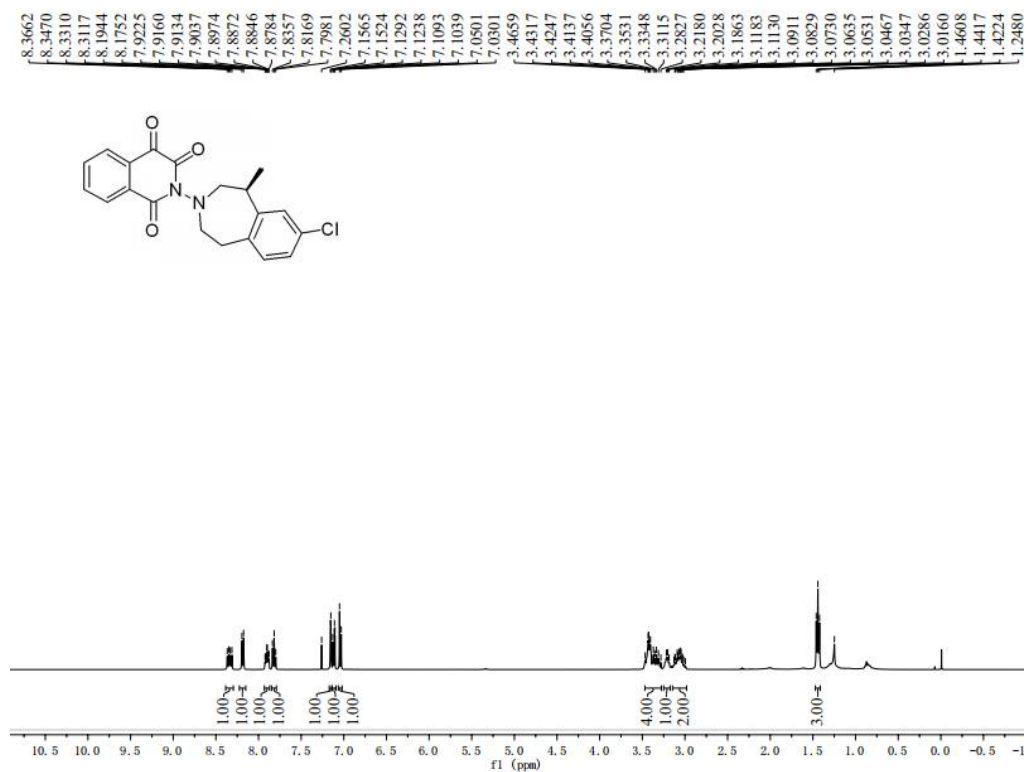

**<sup>13</sup>C NMR (101 MHz) Spectrum of 3y in CDCl<sub>3</sub>**

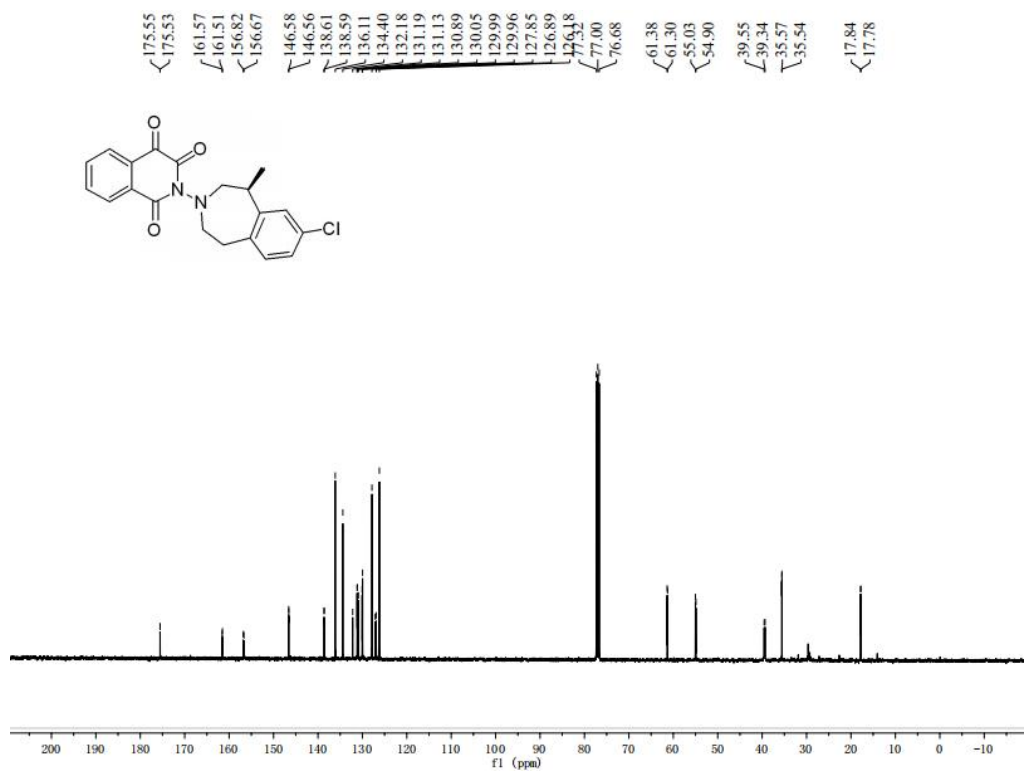

**<sup>1</sup>H NMR (500 MHz) Spectrum of 3mb and 3mb' in CDCl<sub>3</sub>**

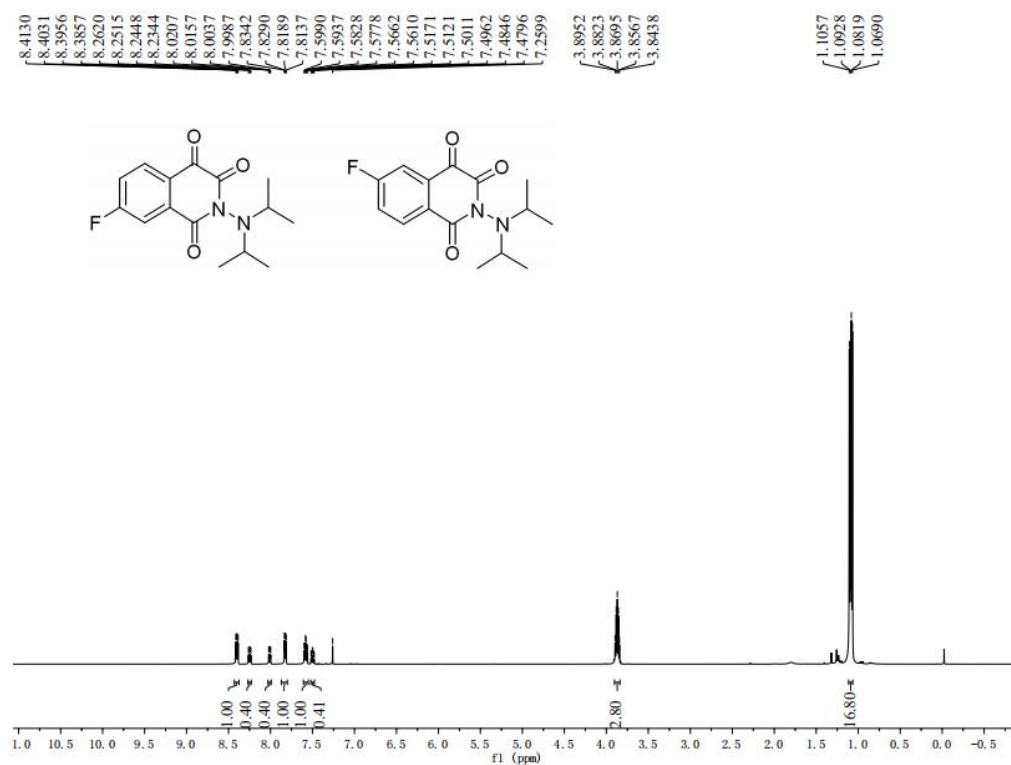

**<sup>13</sup>C NMR (126 MHz) Spectrum of 3mb and 3mb' in CDCl<sub>3</sub>**

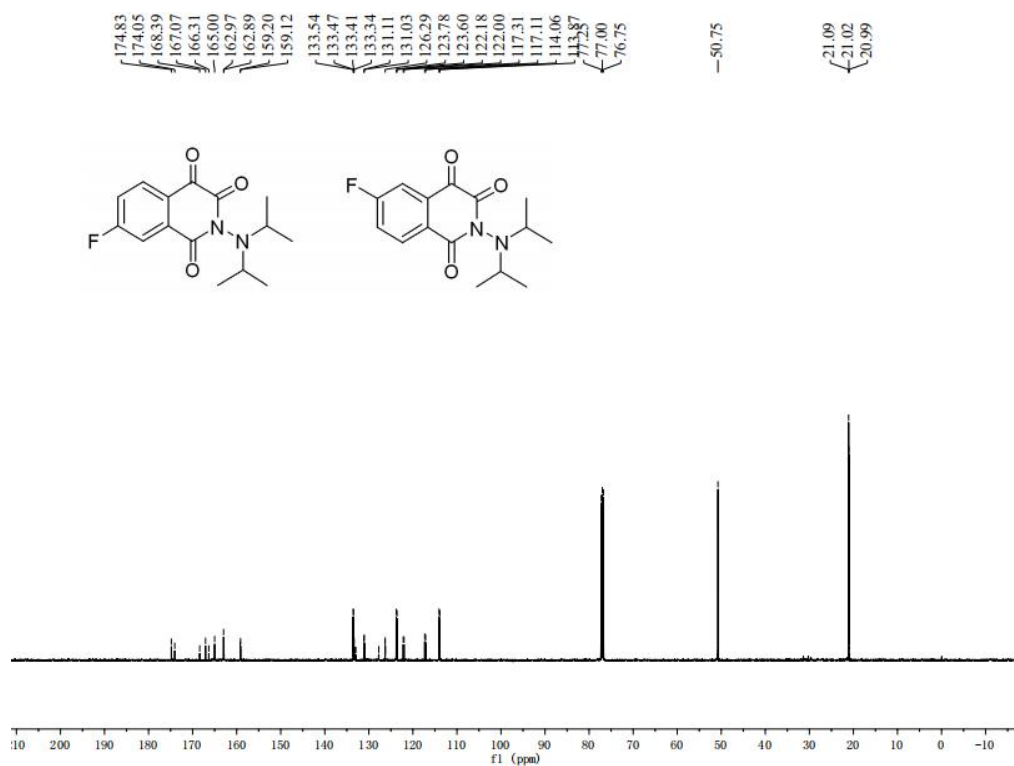

**$^{19}\text{F}$  NMR (470 MHz) Spectrum of 3mb and 3mb' in  $\text{CDCl}_3$**

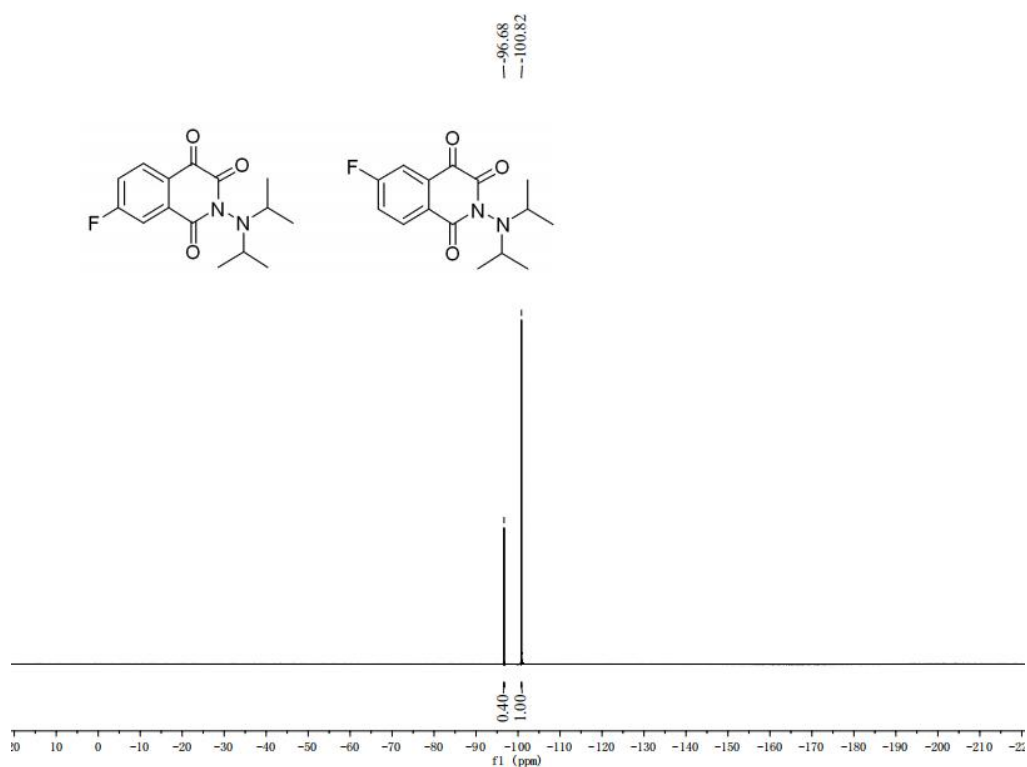

**$^1\text{H}$  NMR (500 MHz) Spectrum of 3mc and 3mc' in  $\text{CDCl}_3$**

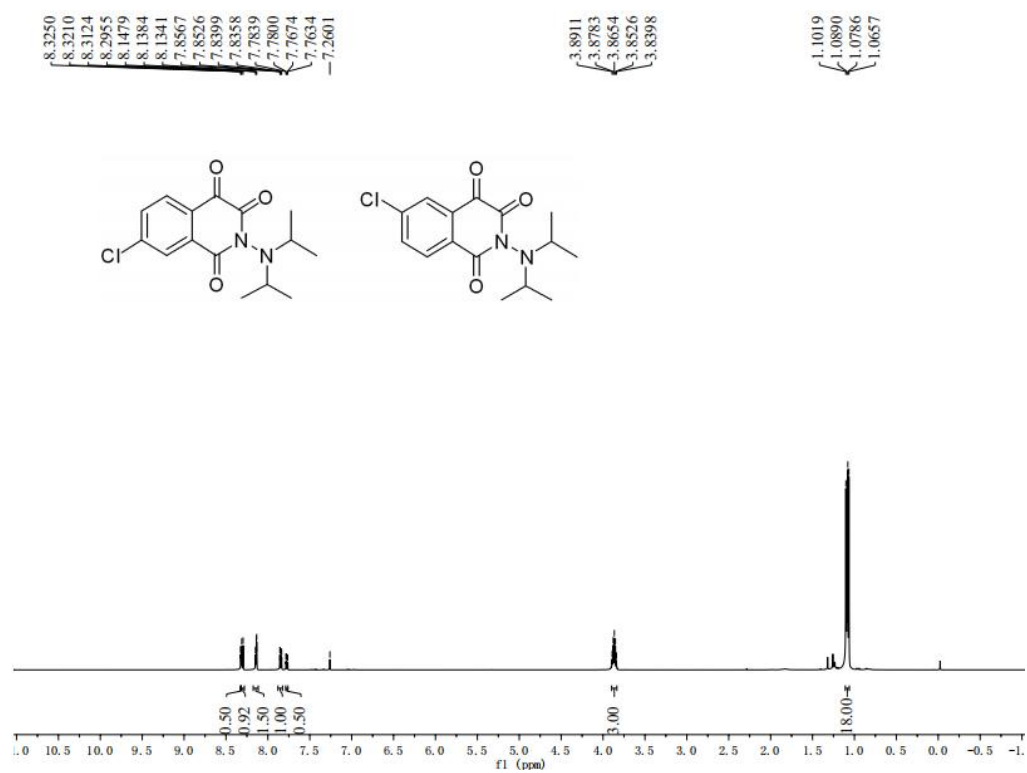

**$^{13}\text{C}$  NMR (126 MHz) Spectrum of 3mc and 3mc' in  $\text{CDCl}_3$**

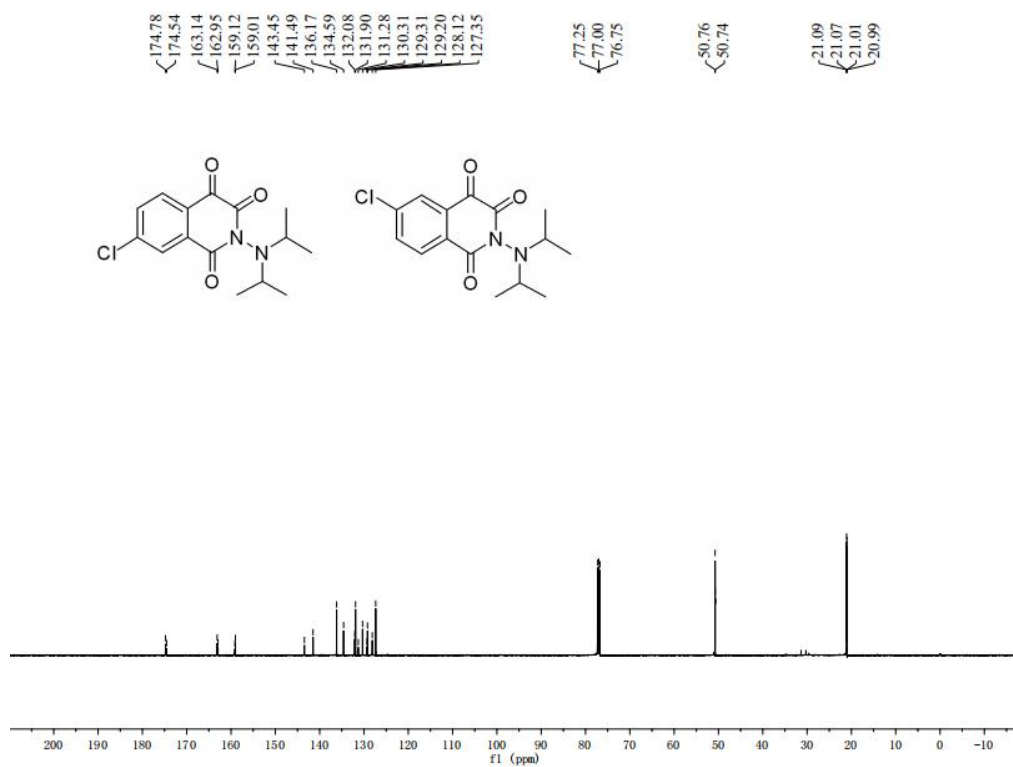

**$^1\text{H}$  NMR (400 MHz) Spectrum of 3md and 3md' in  $\text{CDCl}_3$**

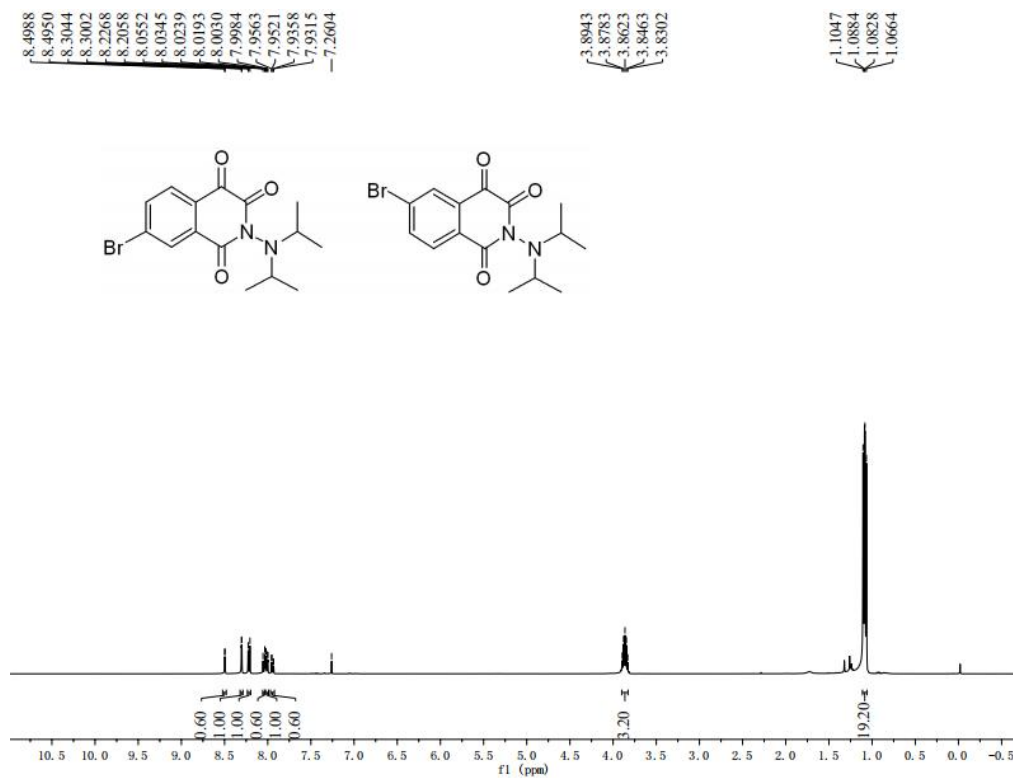

**$^{13}\text{C}$  NMR (101 MHz) Spectrum of 3md and 3md' in  $\text{CDCl}_3$**

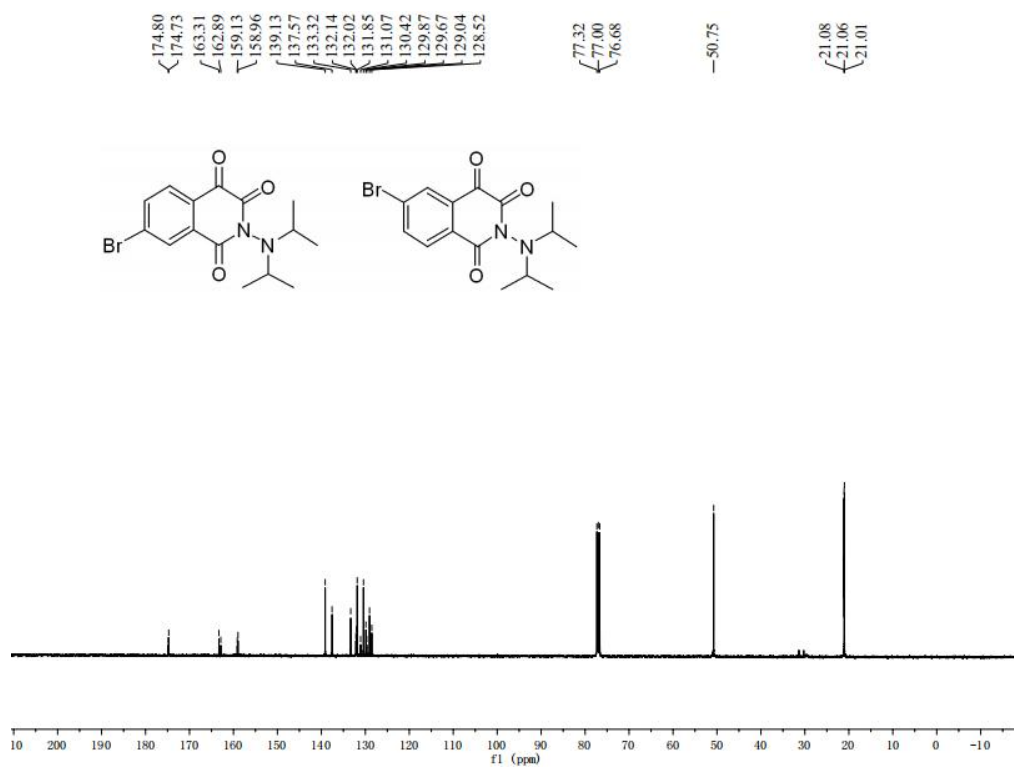

**$^1\text{H}$  NMR (500 MHz) Spectrum of 3me and 3me' in  $\text{CDCl}_3$**

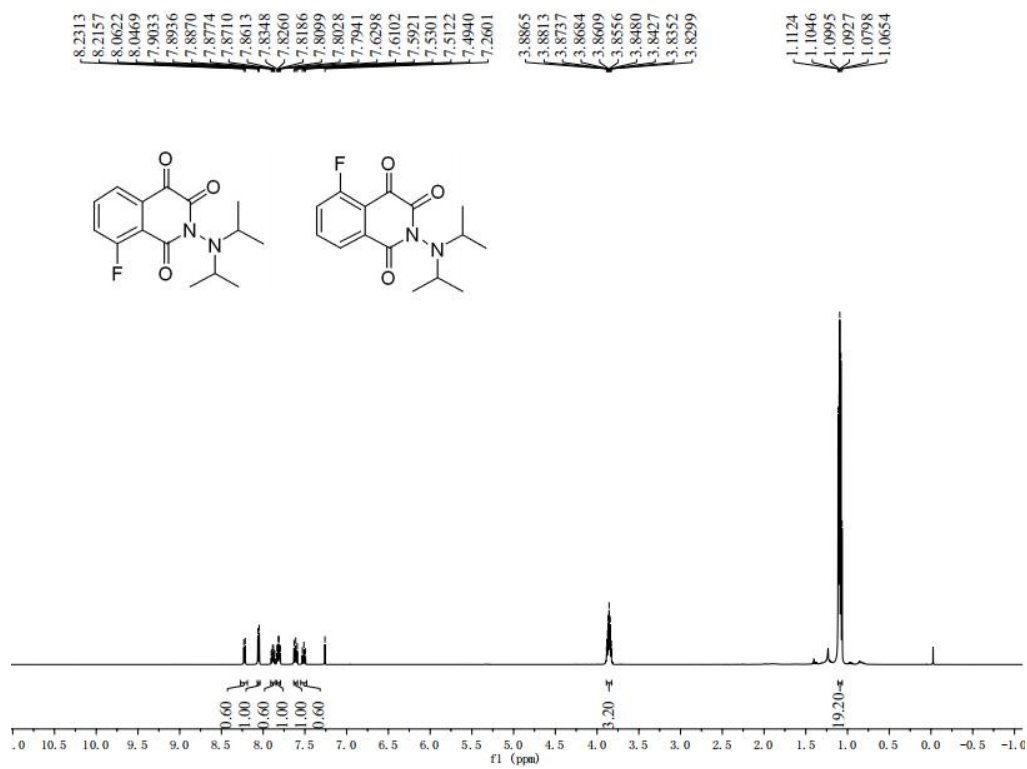

**$^{13}\text{C}$  NMR (126 MHz) Spectrum of 3me and 3me' in  $\text{CDCl}_3$**

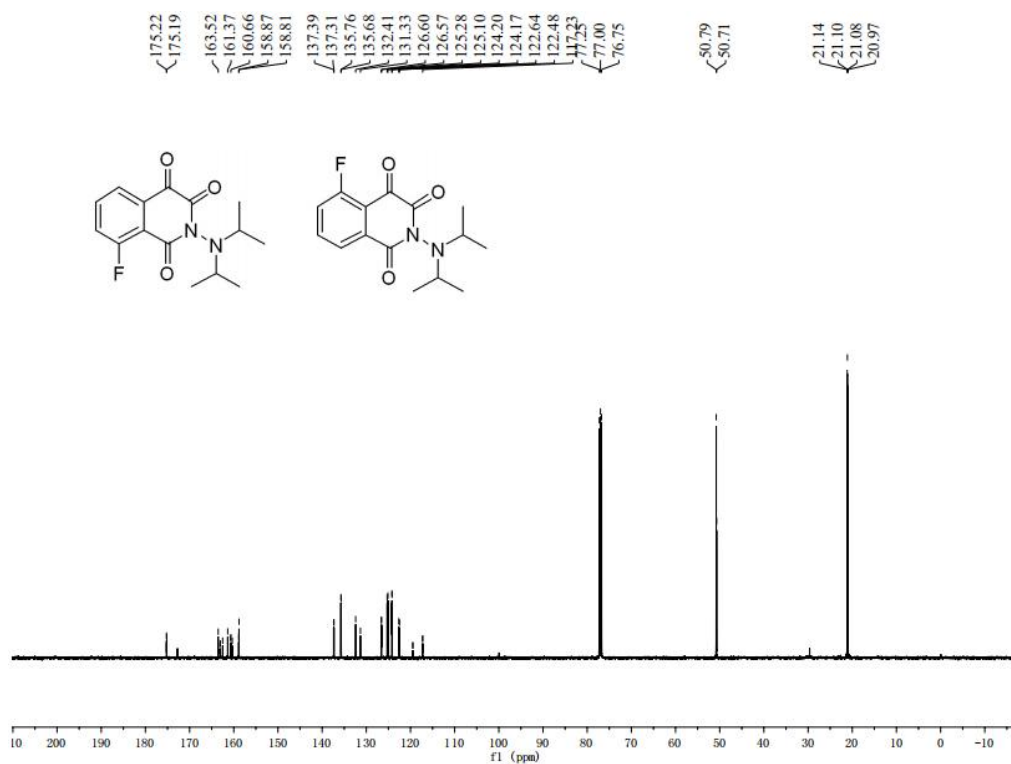

**$^{19}\text{F}$  NMR (376 MHz) Spectrum of 3me and 3me' in  $\text{CDCl}_3$**

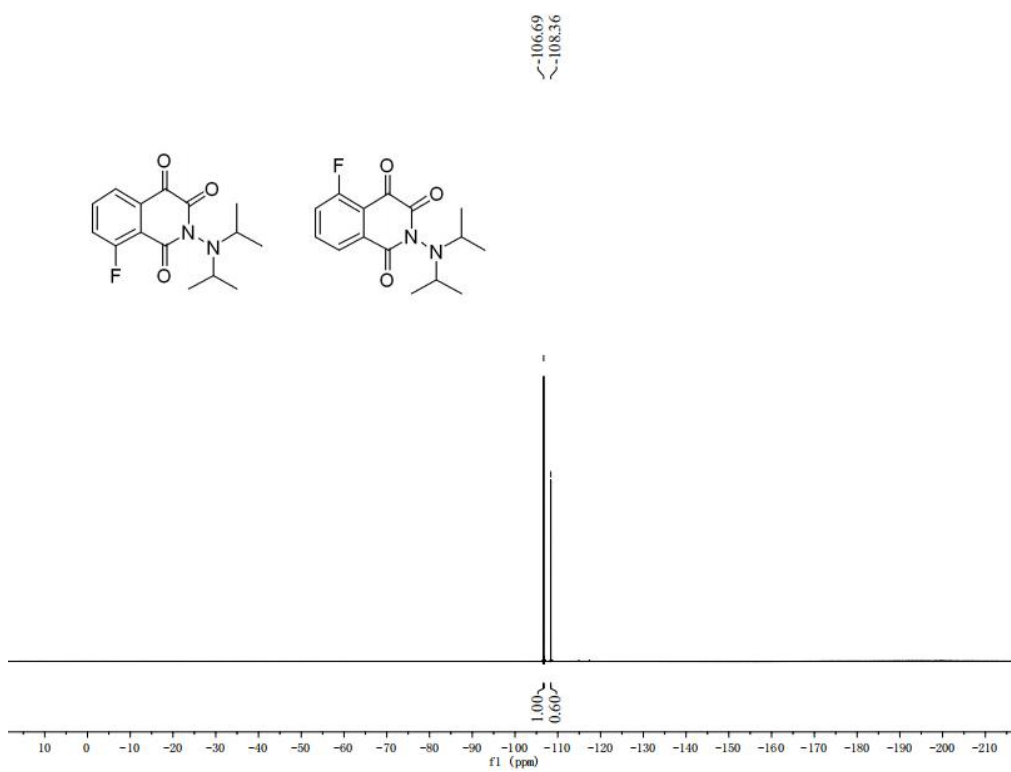

**<sup>1</sup>H NMR (500 MHz) Spectrum of 3mf and 3mf' in CDCl<sub>3</sub>**

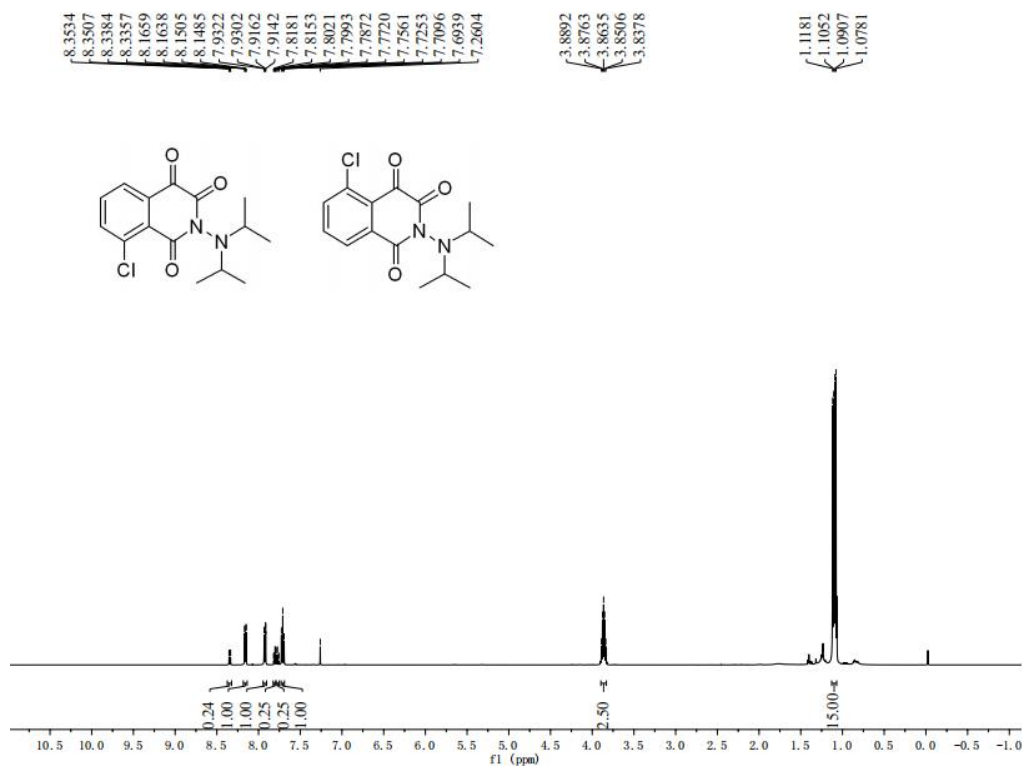

**<sup>13</sup>C NMR (126 MHz) Spectrum of 3mf and 3mf' in CDCl<sub>3</sub>**

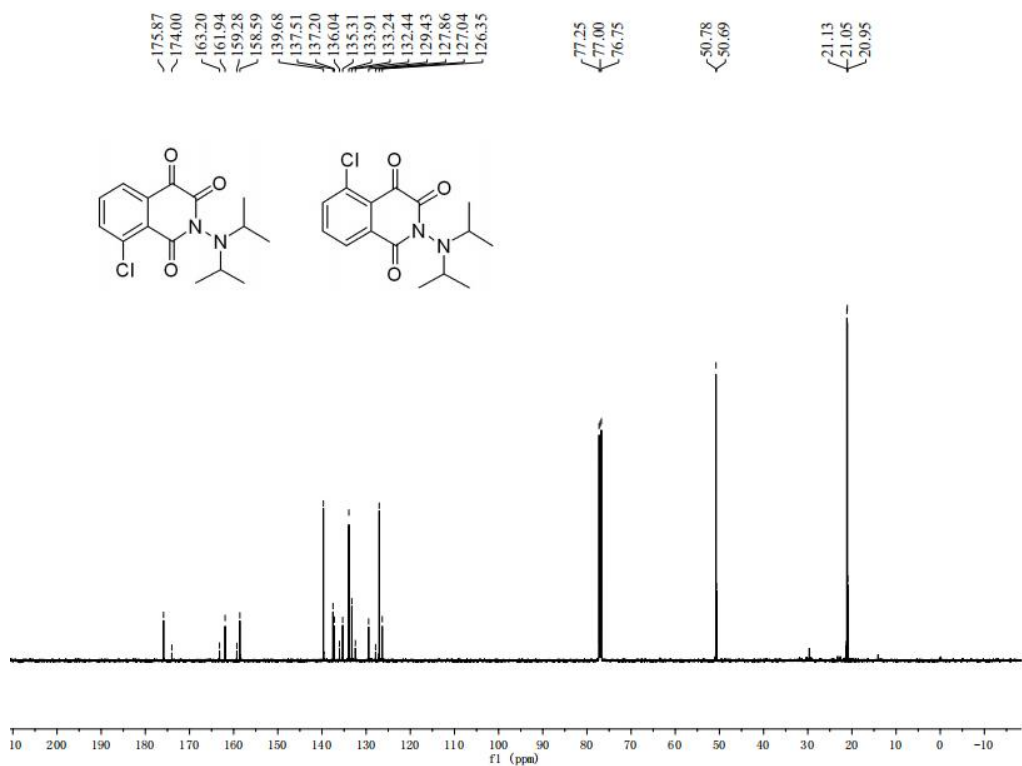

**<sup>1</sup>H NMR (400 MHz) Spectrum of 3mg and 3mg' in CDCl<sub>3</sub>**

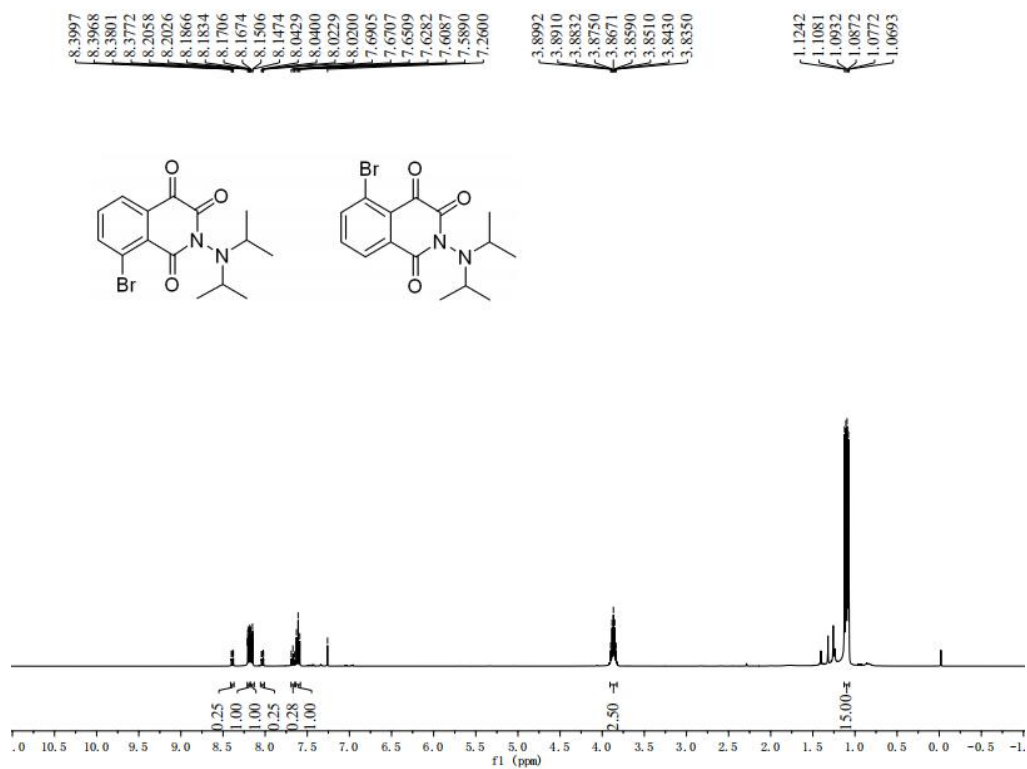

**<sup>13</sup>C NMR (101 MHz) Spectrum of 3mg and 3mg' in CDCl<sub>3</sub>**

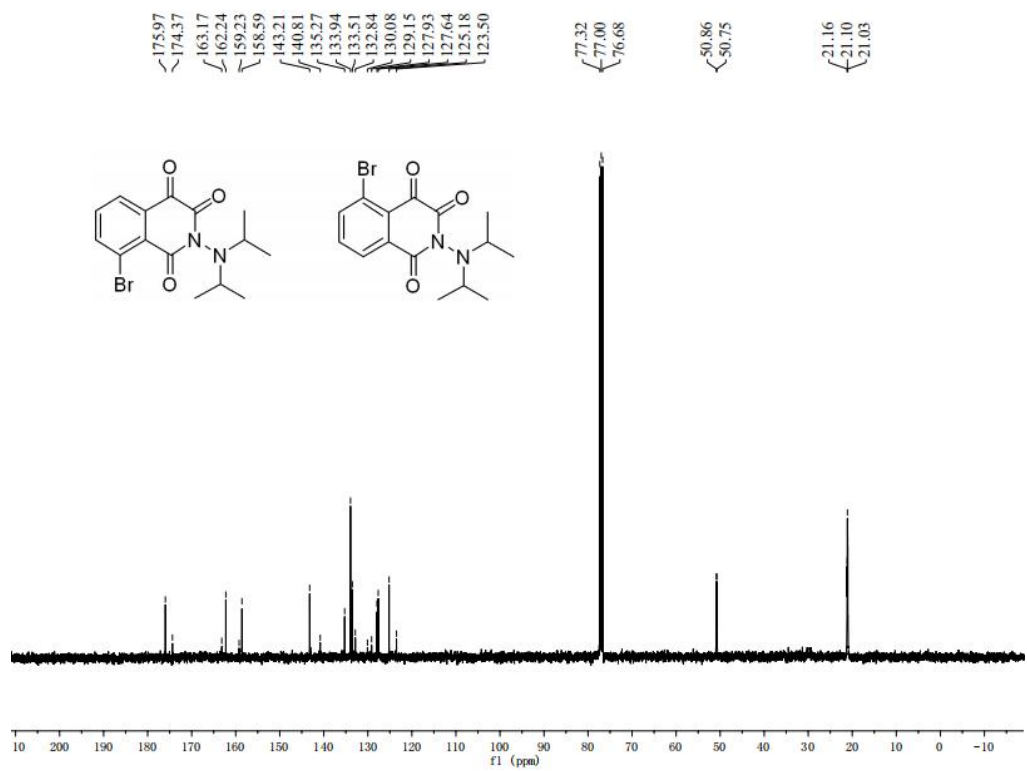

**<sup>1</sup>H NMR (500 MHz) Spectrum of 3mh and 3mh' in CDCl<sub>3</sub>**

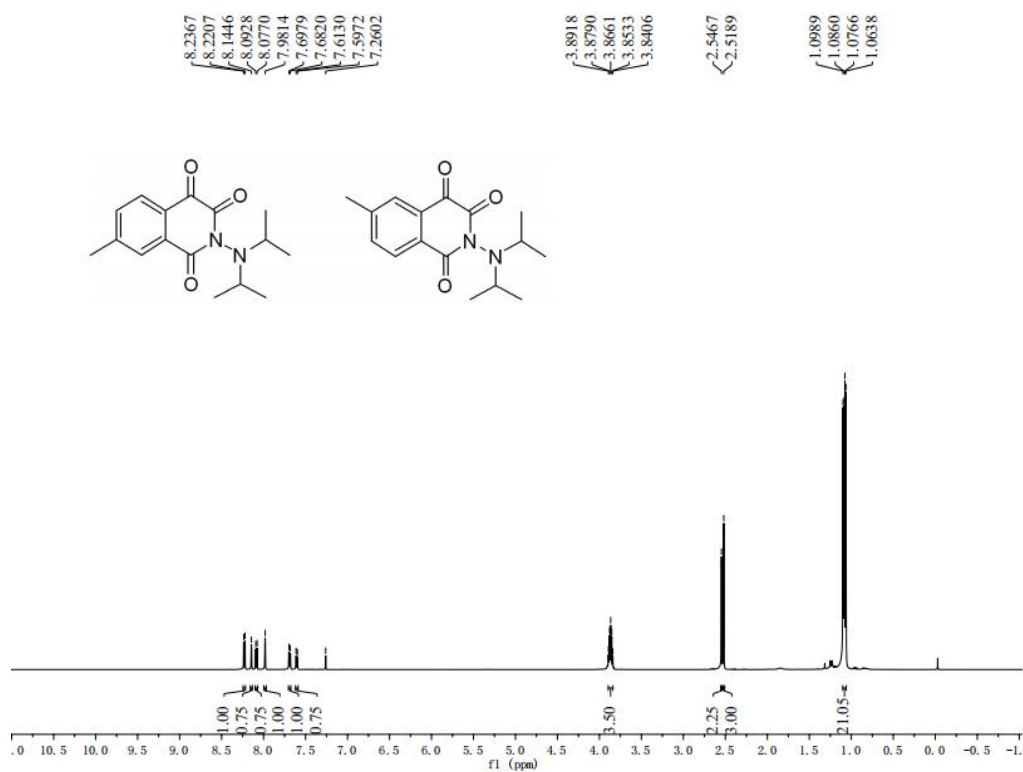

**<sup>13</sup>C NMR (126 MHz) Spectrum of 3mh and 3mh' in CDCl<sub>3</sub>**

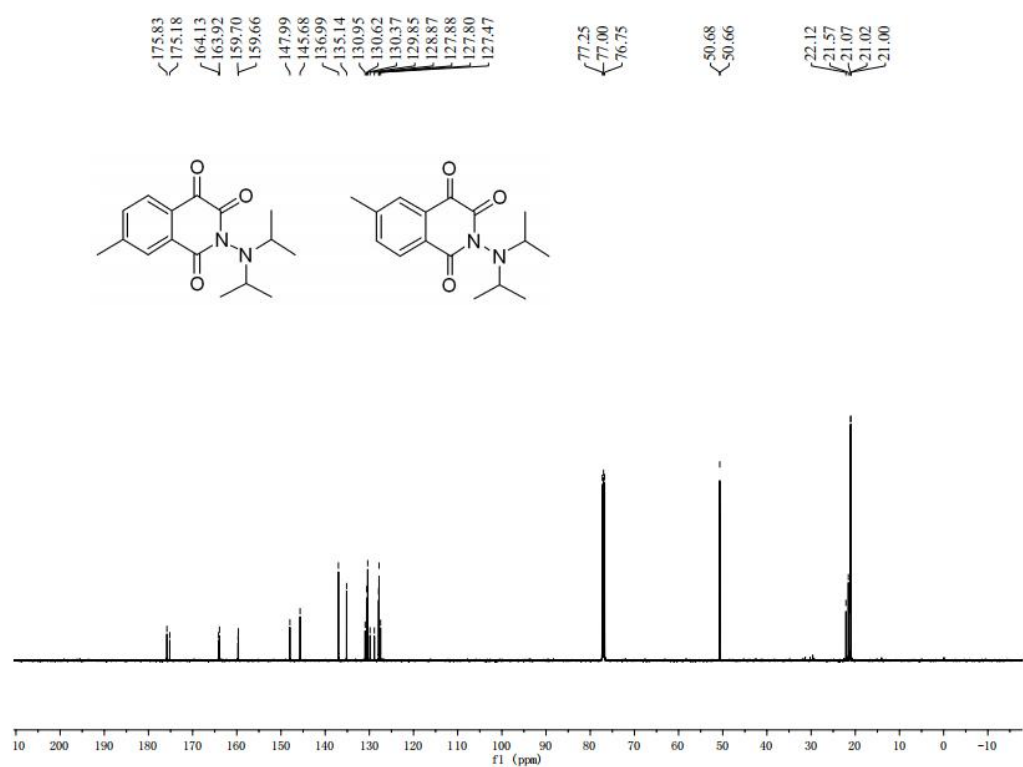

**<sup>1</sup>H NMR (500 MHz) Spectrum of 3mi and 3mi' in CDCl<sub>3</sub>**

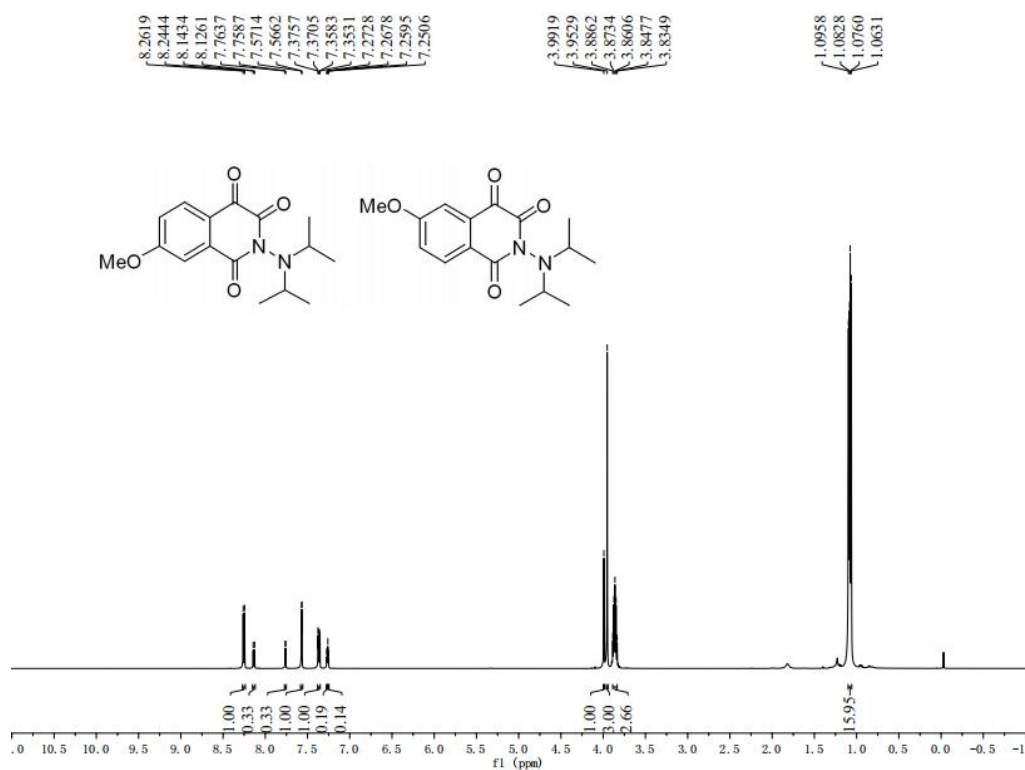

**<sup>13</sup>C NMR (126 MHz) Spectrum of 3mi and 3mi' in CDCl<sub>3</sub>**

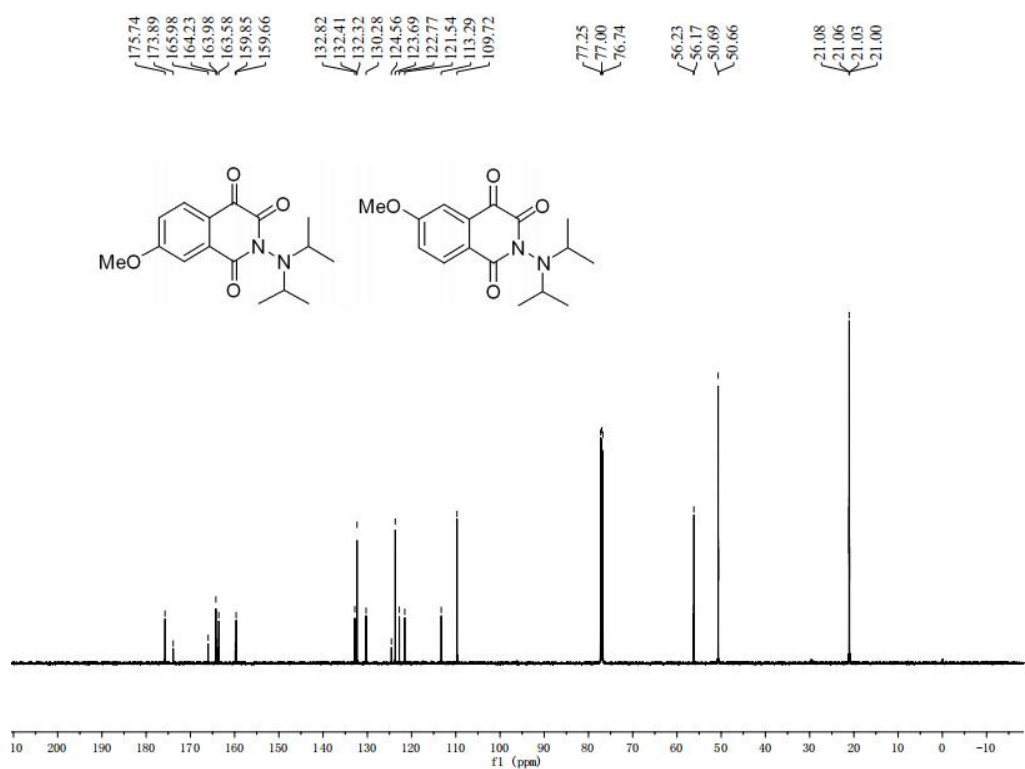

**<sup>1</sup>H NMR (500 MHz) Spectrum of 3mj in CDCl<sub>3</sub>**

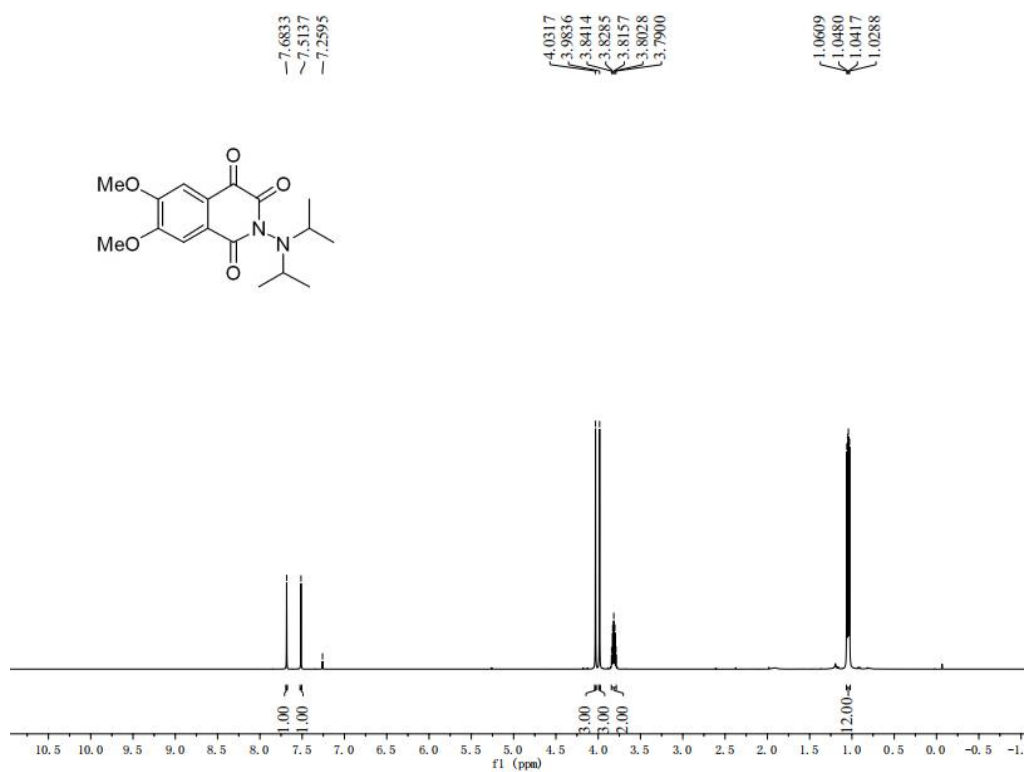

**<sup>13</sup>C NMR (126 MHz) Spectrum of 3mj in CDCl<sub>3</sub>**

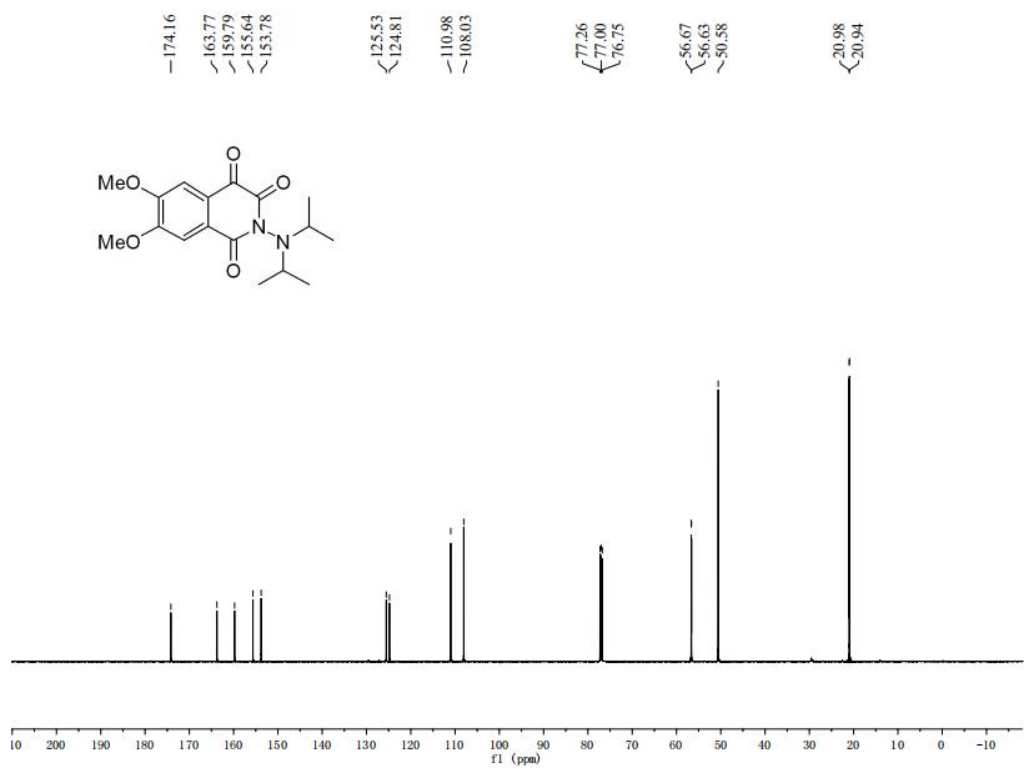

**<sup>1</sup>H NMR (500 MHz) Spectrum of 3mk in CDCl<sub>3</sub>**

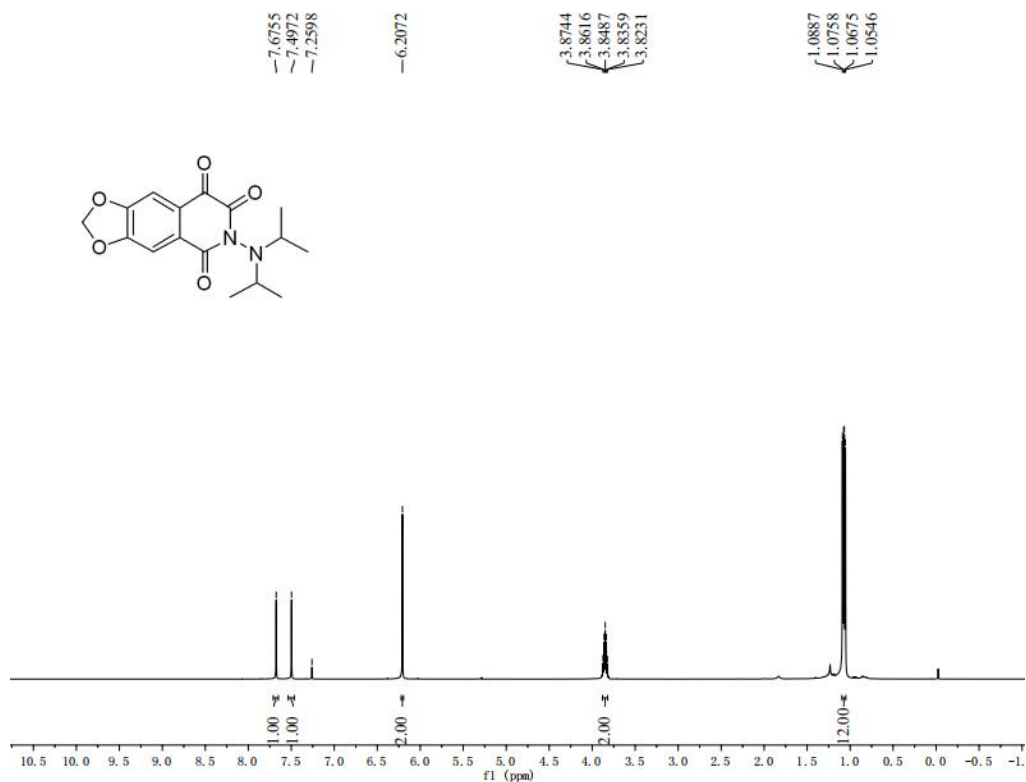

**<sup>13</sup>C NMR (126 MHz) Spectrum of 3mk in CDCl<sub>3</sub>**

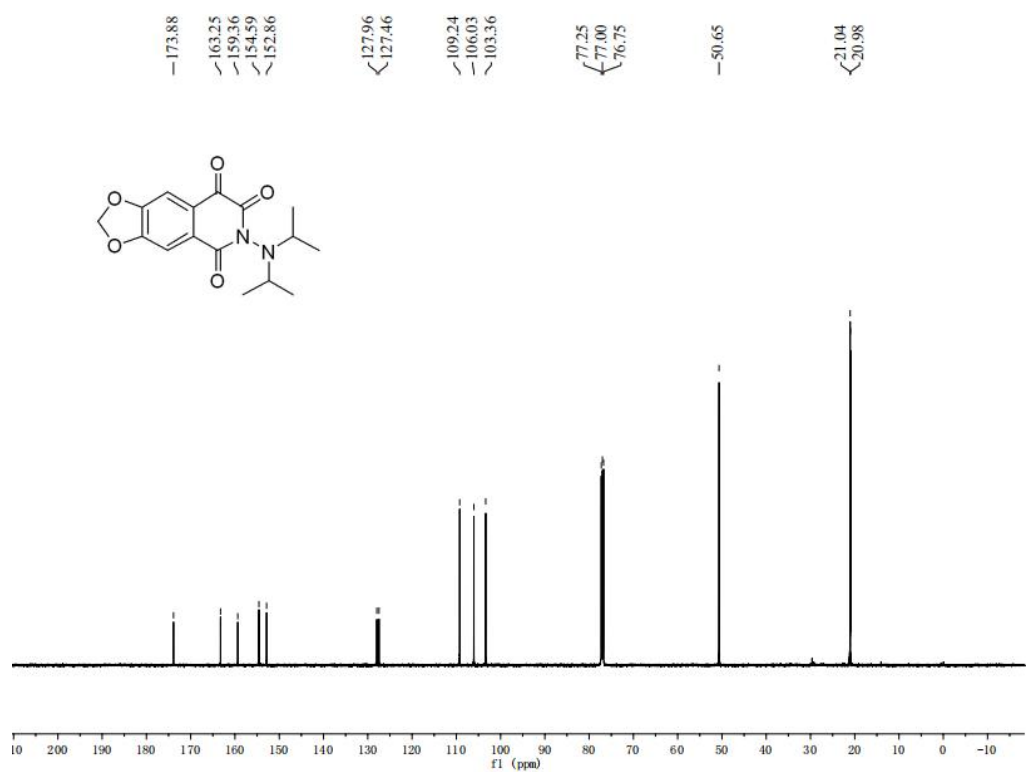

**<sup>1</sup>H NMR (400 MHz) Spectrum of 4a in CDCl<sub>3</sub>**

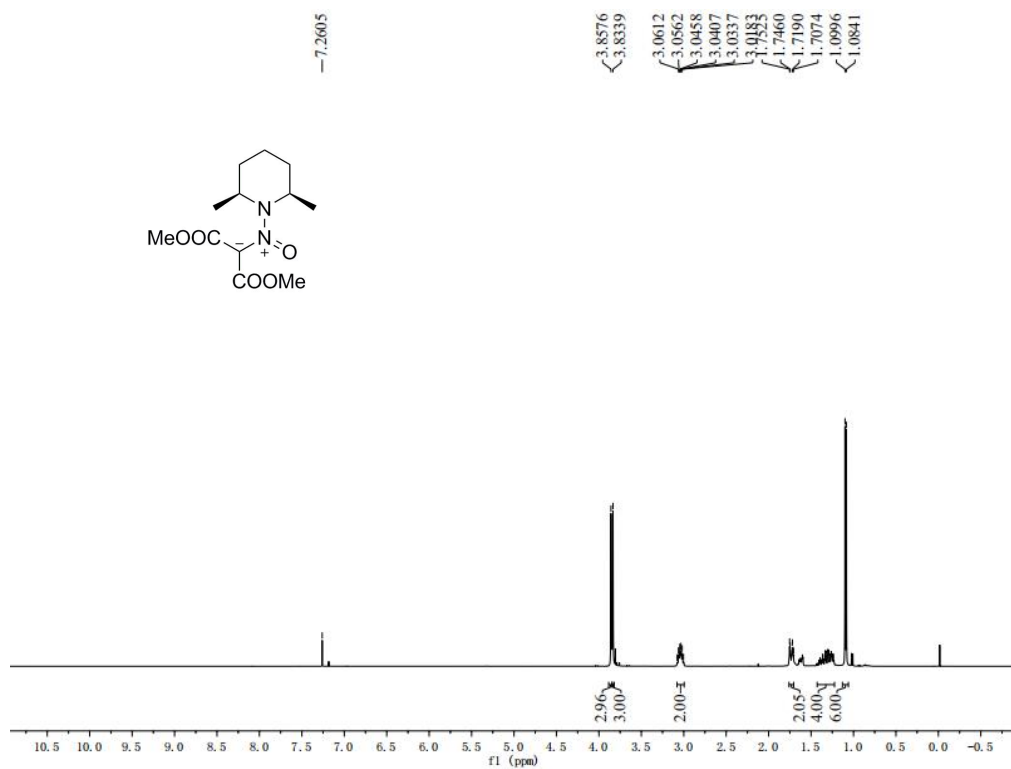

**<sup>13</sup>C NMR (101 MHz) Spectrum of 4a in CDCl<sub>3</sub>**

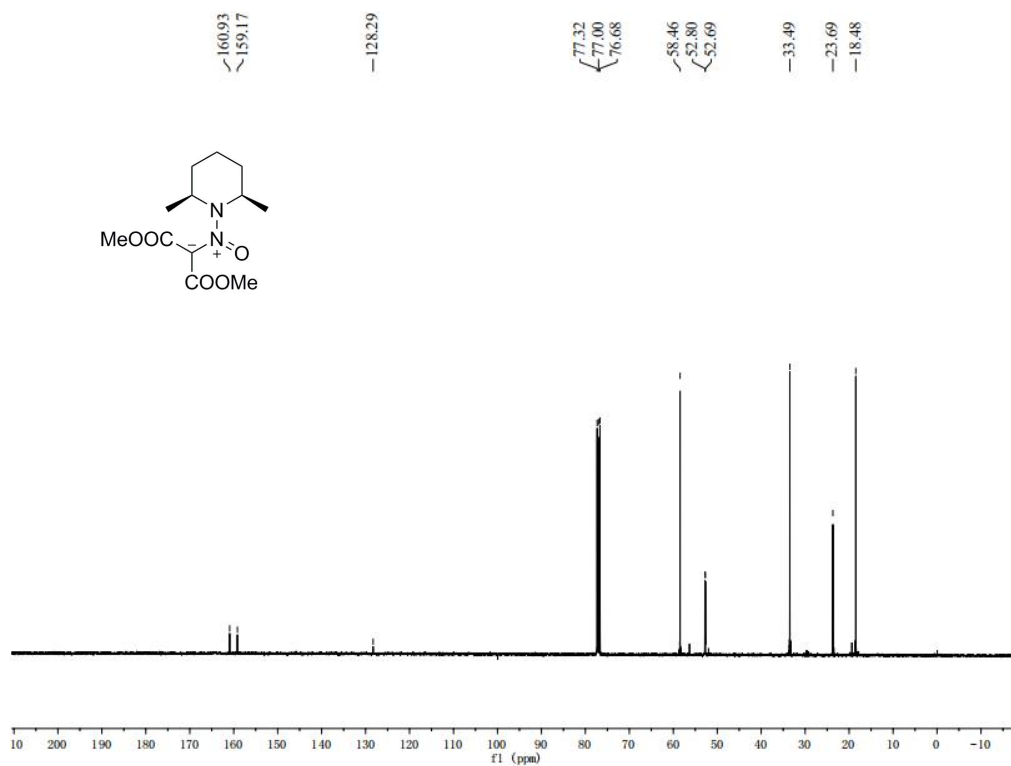

**<sup>1</sup>H NMR (400 MHz) Spectrum of 4b in CDCl<sub>3</sub>**

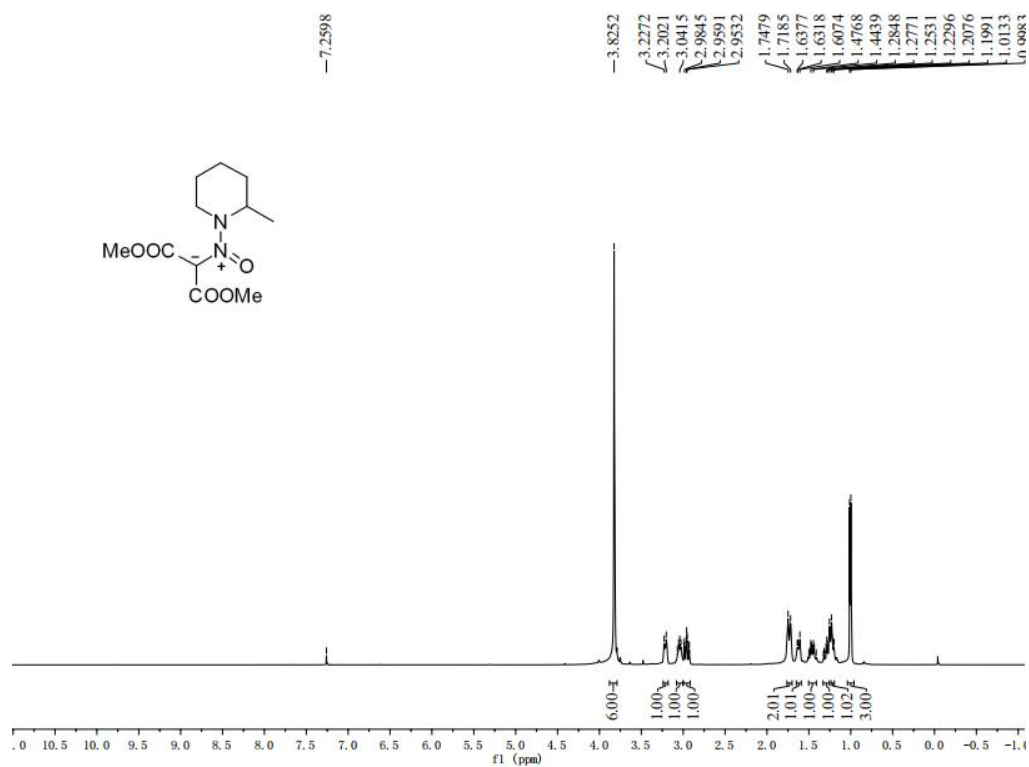

**<sup>13</sup>C NMR (101 MHz) Spectrum of 4b in CDCl<sub>3</sub>**

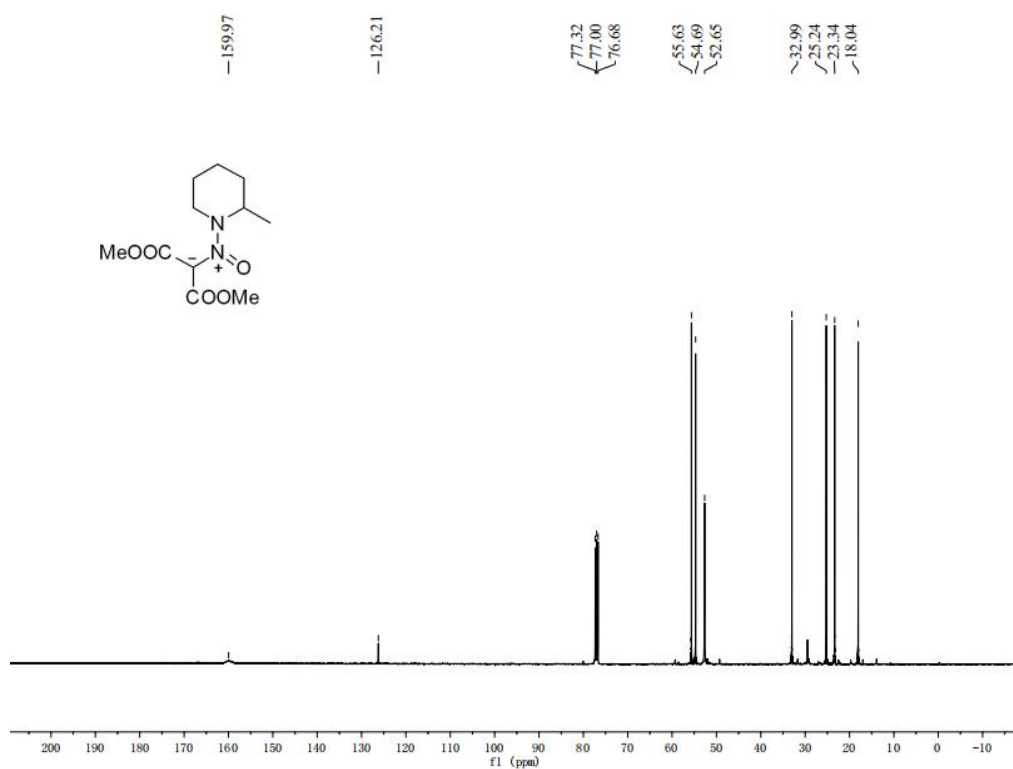

**<sup>1</sup>H NMR (400 MHz) Spectrum of 4c in CDCl<sub>3</sub>**

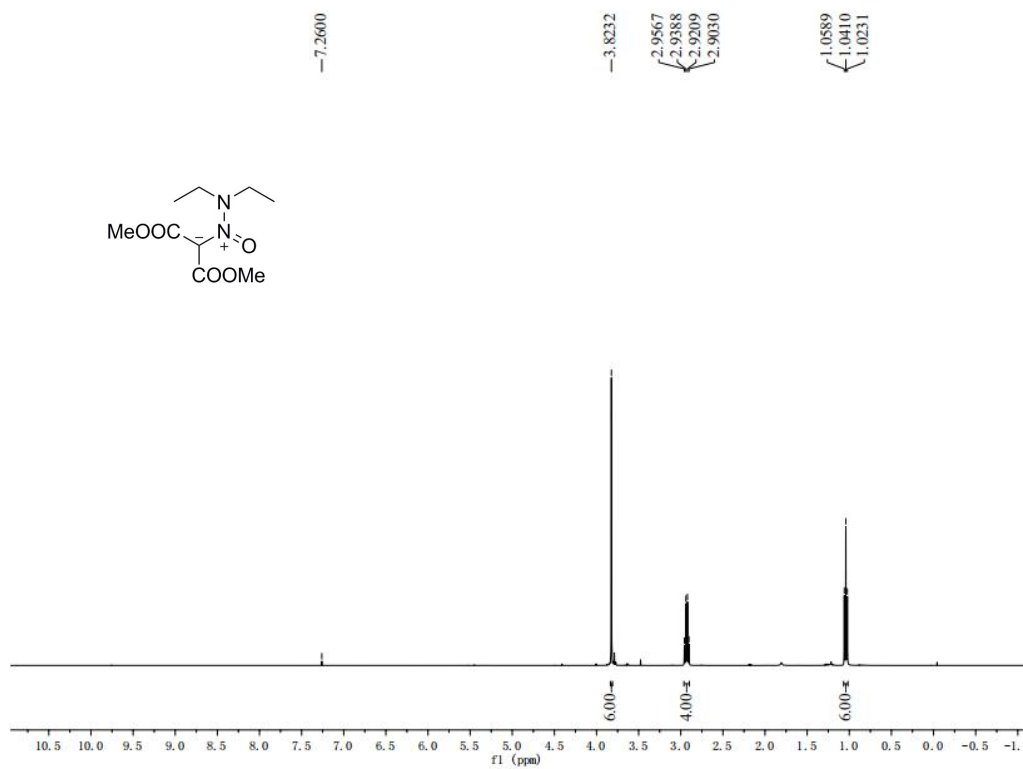

**<sup>13</sup>C NMR (101 MHz) Spectrum of 4c in CDCl<sub>3</sub>**

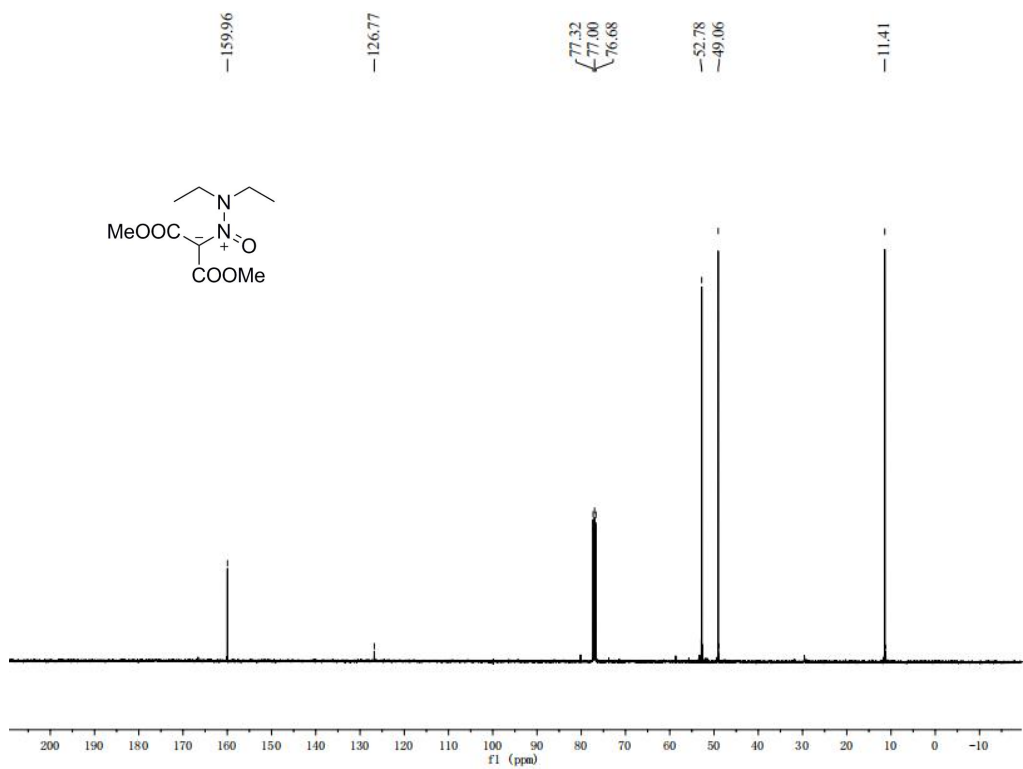

**<sup>1</sup>H NMR (400 MHz) Spectrum of 4d in CDCl<sub>3</sub>**

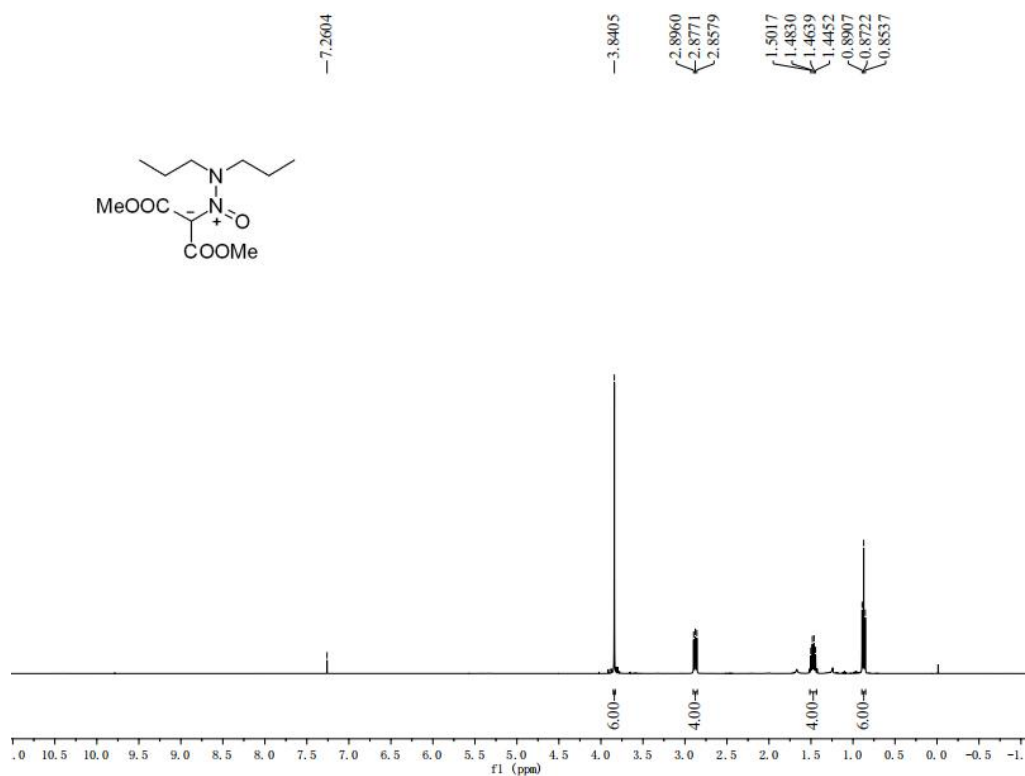

**<sup>13</sup>C NMR (101 MHz) Spectrum of 4d in CDCl<sub>3</sub>**

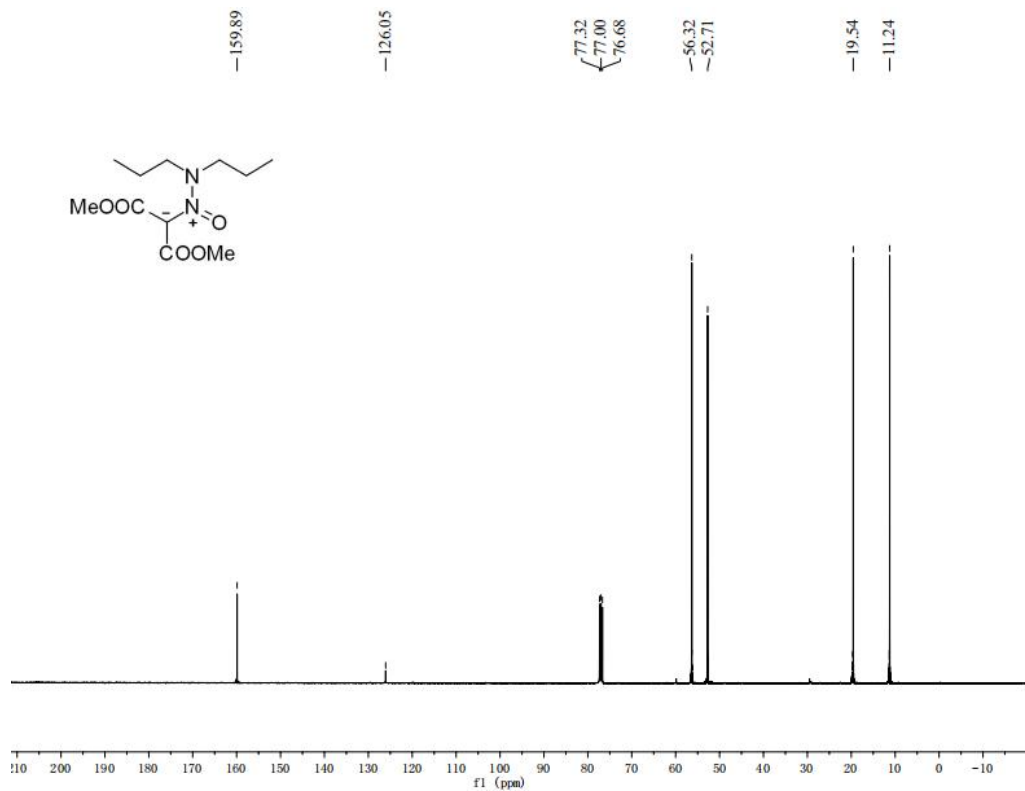

**<sup>1</sup>H NMR (400 MHz) Spectrum of 5 in CDCl<sub>3</sub>**

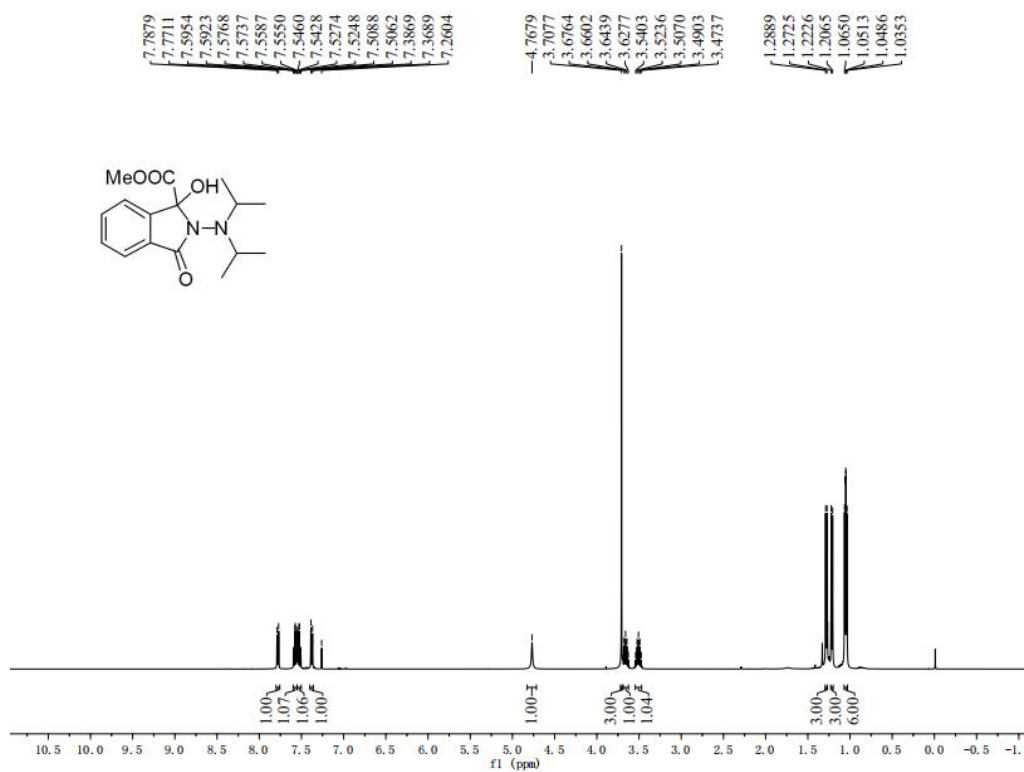

**<sup>13</sup>C NMR (101 MHz) Spectrum of 5 in CDCl<sub>3</sub>**

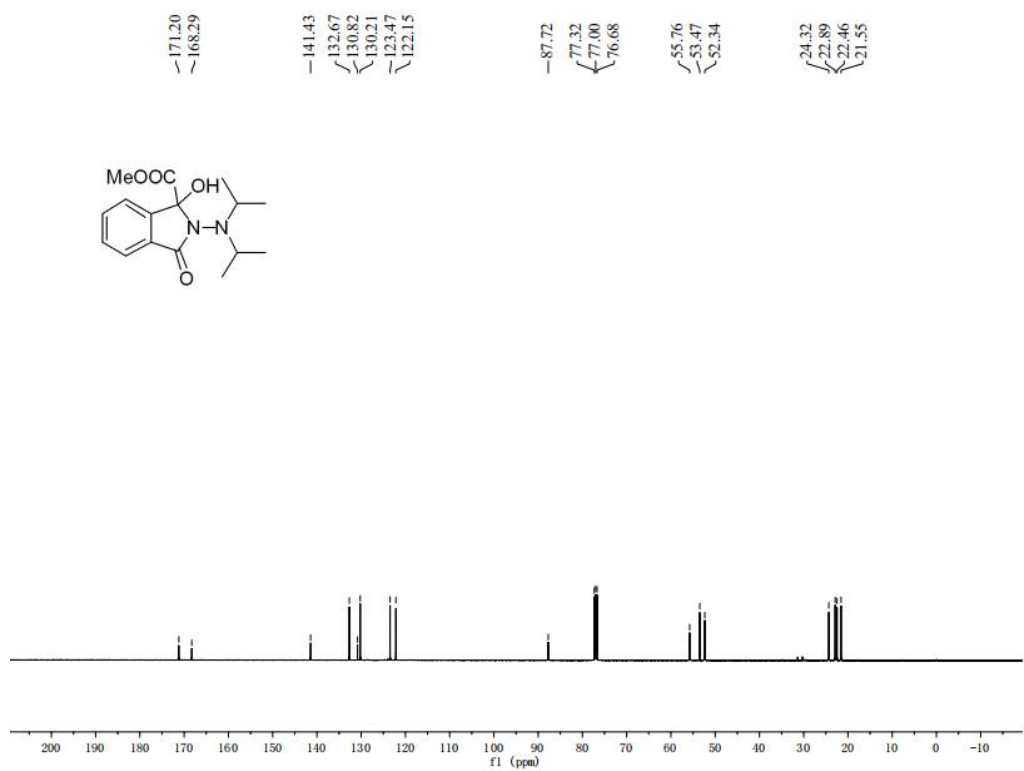



**<sup>1</sup>H NMR (500 MHz) Spectrum of 7 in CDCl<sub>3</sub>**

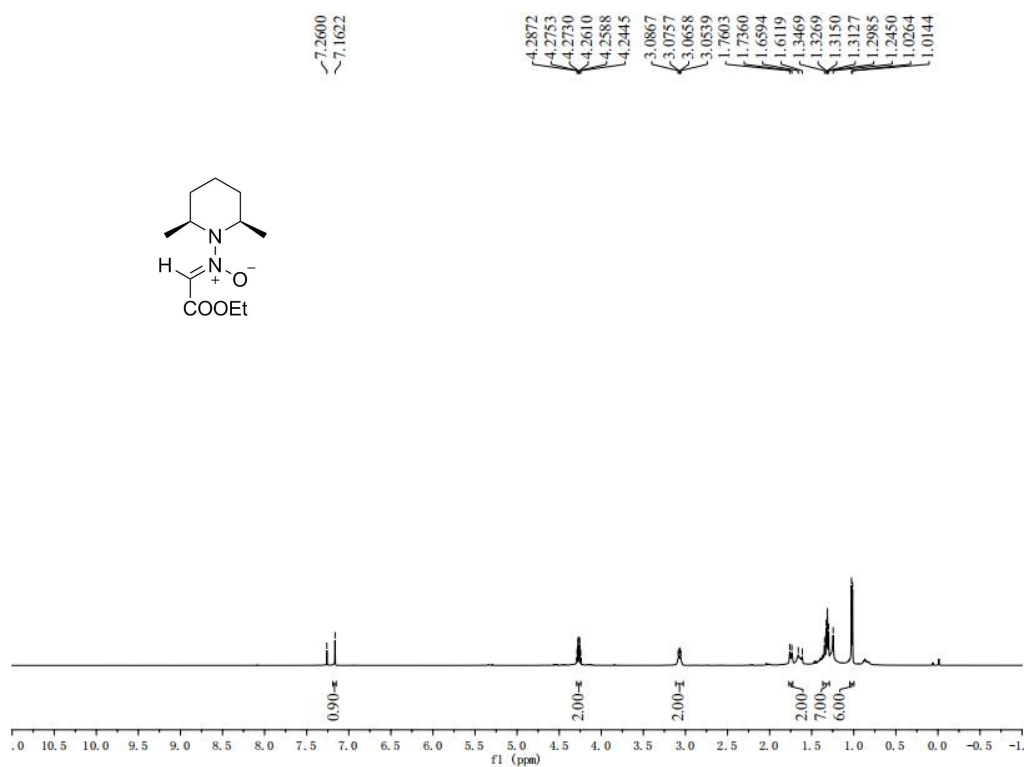

**<sup>13</sup>C NMR (126 MHz) Spectrum of 7 in CDCl<sub>3</sub>**

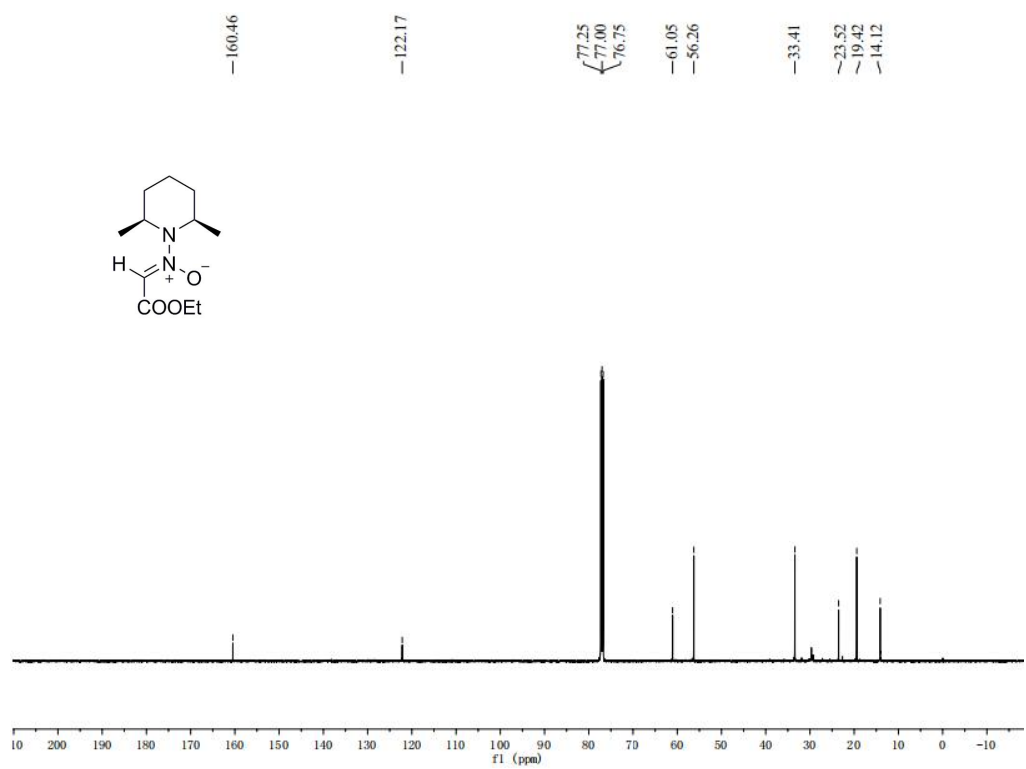

Supplement: d3qo01607b1.pdf [file d3qo01607b1.pdf]
